# Supplementary material
Source: publisher figshare collection journal article supplement (https://gsapubs.figshare.com/ndownloader/files/23315768)
Supplement: Supplementary file 1 [file 23315768]

## Sheet: fullraw
TABLE DR4. FULL ARGON ISOTOPIC DATA
							Relative Isotopic Abundance (fA)											Derived Results							Inverse Isochron Data
Run ID	Sample	Unit	J	J ± 1σ	Material	Power (Watts)	40Ar ± 1σ		39Ar ± 1σ		38Ar ± 1σ		37Ar ± 1σ		36Ar ± 1σ		Ca/K	40Ar*/39Ar ± 1σ		%40Ar*	Age (Ma) ± 1σ		± 1σ w/ J	39Ar (mol)	36Ar/40Ar ± %1σ		39Ar/40Ar ± %1σ		39Ar/36Ar %1σ	40Ar/39Ar Er. Corr.	36Ar/39Ar Er. Corr.
Single Crystal Analyses
2361-01A	FCs-C1	Fish Canyon Tuff	0.0017377	4.9978e-06	sanidine	12	949.031	0.246982	105.832	0.195783	1.46753	0.115862	0.129551	0.12452	0.0106983	0.0011155	0.0159971	8.93041	0.0170072	99.6715	28.183	0.053261	0.0964716	5.64358e-15	1.1e-05	10.9036	0.111609	0.18685	10.9049	0.999853	0.0003326
2361-02A	FCs-C1	Fish Canyon Tuff	0.0017377	4.9978e-06	sanidine	12	1354.91	0.264008	151.184	0.194257	1.90199	0.117157	-0.0005866	0.130711	0.0098385	0.001163	-5.1e-05	8.93501	0.0118664	99.7832	28.1974	0.0371614	0.0886428	8.06206e-15	7.2555e-06	12.0727	0.111677	0.129982	12.0732	0.999942	0.0002421
2361-03A	FCs-C1	Fish Canyon Tuff	0.0017377	4.9978e-06	sanidine	12	2047.43	0.276586	228.255	0.209278	2.82737	0.117499	0.386013	0.124784	0.03152	0.0018822	0.0222203	8.92211	0.0086573	99.5503	28.157	0.0271121	0.084813	1.21719e-14	1.51e-05	6.15061	0.111577	0.0926928	6.15122	0.999887	0.0003203
2361-04A	FCs-C1	Fish Canyon Tuff	0.0017377	4.9978e-06	sanidine	12	1892.56	0.283196	210.829	0.203536	2.64879	0.115862	0.249129	0.124784	0.0169157	0.0012349	0.0155319	8.94592	0.0089429	99.7402	28.2316	0.0280056	0.0853023	1.12427e-14	8.69595e-06	7.62866	0.111492	0.0977109	7.62916	0.999918	0.0003006
2361-05A	FCs-C1	Fish Canyon Tuff	0.0017377	4.9978e-06	sanidine	12	1549.55	0.270185	173.42	0.208579	2.31974	0.114413	0.333411	0.124784	0.0116405	0.00117	0.0252891	8.90882	0.0110407	99.7878	28.1154	0.0345772	0.0873775	9.24783e-15	7.10194e-06	10.8293	0.11201	0.121554	10.8299	0.999937	0.0002311
2361-06A	FCs-C1	Fish Canyon Tuff	0.0017377	4.9978e-06	sanidine	12	1587.28	0.270185	177.251	0.203111	2.1389	0.116822	0.260178	0.125056	0.0079192	0.0014523	0.019315	8.93491	0.010664	99.8595	28.1971	0.0333958	0.0871304	9.45212e-15	4.69886e-06	19.7092	0.111763	0.115867	19.7095	0.999983	0.0001269
2361-07A	FCs-C1	Fish Canyon Tuff	0.0017377	4.9978e-06	sanidine	12	1411	0.264008	157.08	0.197719	1.96975	0.115557	0.162892	0.125913	0.0063336	0.0011219	0.0136508	8.96366	0.0116327	99.8722	28.2872	0.0364279	0.0885694	8.37645e-15	4.27502e-06	18.9814	0.111419	0.127278	18.9817	0.999977	0.000145
2361-08A	FCs-C1	Fish Canyon Tuff	0.0017377	4.9978e-06	sanidine	12	324.218	0.237065	36.0947	0.180191	0.479899	0.117499	0.0499627	0.125334	0.0021754	0.0009724	0.0182349	8.9577	0.0459668	99.8084	28.2685	0.143946	0.165014	1.92479e-15	6.41036e-06	48.0473	0.111422	0.504636	48.0492	0.999945	0.0002206
2361-09A	FCs-C1	Fish Canyon Tuff	0.0017377	4.9978e-06	sanidine	12	1562.42	0.264008	173.97	0.203073	2.23615	0.116174	0.374183	0.13231	0.0188211	0.0015352	0.0283447	8.94233	0.0109004	99.6534	28.2203	0.0341357	0.0874773	9.27717e-15	1.16e-05	8.57178	0.11144	0.117967	8.57246	0.999905	0.0002825
2361-10A	FCs-C1	Fish Canyon Tuff	0.0017377	4.9978e-06	sanidine	12	961.939	0.252389	107.171	0.195306	1.40577	0.115862	0.313563	0.125334	0.0068866	0.0010702	0.0385719	8.95067	0.0167768	99.8041	28.2465	0.0525377	0.0962246	5.71504e-15	6.55424e-06	17.3537	0.111505	0.184151	17.3544	0.999944	0.0002155
2361-11A	FCs-C1	Fish Canyon Tuff	0.0017377	4.9978e-06	sanidine	12	1876.93	0.270185	209.448	0.209017	2.64997	0.116822	0.152333	0.124784	0.0038981	0.0014521	0.0095954	8.94859	0.0092858	99.9424	28.2399	0.0290791	0.085683	1.11691e-14	1.92142e-06	40.7585	0.111685	0.100845	40.7585	0.999997	5.04e-05
2361-12A	FCs-C1	Fish Canyon Tuff	0.0017377	4.9978e-06	sanidine	12	1150.52	0.25807	128.382	0.196452	1.51621	0.116494	0.244338	0.124784	0.0138179	0.0011156	0.0251187	8.92305	0.0140709	99.6523	28.1599	0.0440659	0.0916587	6.84613e-15	1.16e-05	8.50246	0.11168	0.154685	8.50364	0.999835	0.0003828
2361-13A	FCs-C1	Fish Canyon Tuff	0.0017377	4.9978e-06	sanidine	12	1590.26	0.276586	177.472	0.195984	2.14981	0.116822	0.23593	0.124262	0.0058719	0.0010956	0.017552	8.9439	0.0101962	99.8975	28.2253	0.0319304	0.0866536	9.46391e-15	3.42787e-06	20.5223	0.111693	0.111812	20.5224	0.999985	0.0001319
2361-14A	FCs-C1	Fish Canyon Tuff	0.0017377	4.9978e-06	sanidine	12	480.231	0.231741	53.2383	0.180578	0.66645	0.116174	-0.0149595	0.124262	0.0063445	0.000983	-0.0037127	8.97705	0.031291	99.6038	28.3291	0.0979853	0.127035	2.839e-15	1.33e-05	15.8356	0.110954	0.342663	15.8388	0.999766	0.0004294
2361-15A	FCs-C1	Fish Canyon Tuff	0.0017377	4.9978e-06	sanidine	12	1382.03	0.270185	154.159	0.197688	1.96346	0.117499	0.210019	0.125913	0.0204137	0.0011228	0.0180073	8.91865	0.0118011	99.5672	28.1462	0.0369579	0.0884259	8.22071e-15	1.45e-05	5.72336	0.111639	0.129742	5.72463	0.999743	0.000515
2361-16A	FCs-C1	Fish Canyon Tuff	0.0017377	4.9978e-06	sanidine	12	1373.28	0.270185	152.881	0.202848	1.9315	0.116494	0.0925924	0.12562	0.0039378	0.0015347	0.0080083	8.96773	0.0124236	99.9181	28.2999	0.0389043	0.0896489	8.15258e-15	2.73705e-06	41.2851	0.11142	0.134158	41.2852	0.999995	6.99e-05
2361-17A	FCs-C1	Fish Canyon Tuff	0.0017377	4.9978e-06	sanidine	12	1152.48	0.25807	129.11	0.194521	1.41924	0.116174	0.100805	0.12452	0.0027364	0.0010454	0.0103462	8.91282	0.0138178	99.9328	28.1279	0.0432742	0.0912008	6.88497e-15	2.24327e-06	41.3816	0.112123	0.152344	41.3817	0.999993	7.96e-05
2361-18A	FCs-C1	Fish Canyon Tuff	0.0017377	4.9978e-06	sanidine	12	2214.32	0.296985	247.348	0.20408	2.98236	0.115862	0.410066	0.12562	0.011713	0.0011631	0.0219769	8.93148	0.0076291	99.8517	28.1864	0.0238919	0.0839188	1.31901e-14	4.95896e-06	10.7965	0.111797	0.0836054	10.7967	0.99997	0.0001994
2361-19A	FCs-C1	Fish Canyon Tuff	0.0017377	4.9978e-06	sanidine	12	2249.34	0.283196	251.62	0.209633	3.23529	0.11497	0.385916	0.125913	0.0066334	0.0011629	0.0203391	8.92489	0.0076775	99.9214	28.1657	0.0240437	0.0839062	1.34179e-14	2.62488e-06	20.0775	0.111958	0.0842746	20.0776	0.999991	9.37e-05
2361-20A	FCs-C1	Fish Canyon Tuff	0.0017377	4.9978e-06	sanidine	12	1308.36	0.264008	145.615	0.196122	1.86403	0.115862	0.180883	0.125056	0.0133066	0.0010831	0.0164853	8.95091	0.0124197	99.704	28.2472	0.038893	0.0895096	7.76512e-15	9.90916e-06	8.53855	0.11139	0.136212	8.53944	0.999873	0.0003503
2361-21A	FCs-C1	Fish Canyon Tuff	0.0017377	4.9978e-06	sanidine	12	1137.89	0.252389	126.412	0.202606	1.67168	0.116494	0.306425	0.124784	0.0159159	0.0011633	0.0321816	8.95766	0.0147804	99.5973	28.2683	0.0462851	0.0930122	6.7411e-15	1.35e-05	7.72917	0.111187	0.161832	7.73064	0.999781	0.0003935
2361-22A	FCs-C1	Fish Canyon Tuff	0.0017377	4.9978e-06	sanidine	12	984.076	0.252389	109.322	0.193885	1.20427	0.116822	0.10325	0.124784	0.0102217	0.0010279	0.0125434	8.96655	0.0163411	99.6945	28.2962	0.0511719	0.0956047	5.82974e-15	1.02e-05	10.4643	0.111185	0.179229	10.4655	0.999853	0.0003509
2361-23A	FCs-C1	Fish Canyon Tuff	0.0017377	4.9978e-06	sanidine	12	1855.26	0.29	206.502	0.208978	2.61899	0.116495	0.223512	0.132725	0.0307932	0.0012732	0.0143858	8.93273	0.0093612	99.511	28.1903	0.0293161	0.0856316	1.1012e-14	1.64e-05	4.26754	0.1114	0.102417	4.26861	0.999712	0.0005593
2361-24A	FCs-C1	Fish Canyon Tuff	0.0017377	4.9978e-06	sanidine	12	330.706	0.231741	36.9297	0.17923	0.491798	0.116174	0.0122218	0.124262	0.0064329	0.0010048	0.0044003	8.89566	0.0444342	99.4216	28.0742	0.139162	0.160582	1.96933e-15	1.94e-05	16.0879	0.111764	0.490447	16.0945	0.999536	0.0006227
2361-25A	FCs-C1	Fish Canyon Tuff	0.0017377	4.9978e-06	sanidine	12	1439.88	0.270185	159.834	0.202919	2.04724	0.116822	0.29919	0.124784	0.0226735	0.0016198	0.0248977	8.95976	0.0119181	99.5412	28.2749	0.0373216	0.0889093	8.52337e-15	1.54e-05	7.39774	0.111098	0.128359	7.39872	0.999849	0.000371
2361-26A	FCs-C1	Fish Canyon Tuff	0.0017377	4.9978e-06	sanidine	12	633.363	0.237065	68.485	0.182372	1.08548	0.118204	0.106672	0.12452	0.0620412	0.0013778	0.0207328	8.9712	0.0249107	97.0861	28.3107	0.0780067	0.112309	3.65206e-15	9.76e-05	2.25993	0.10822	0.26896	2.27502	0.99299	0.0023061
2361-27A	FCs-C1	Fish Canyon Tuff	0.0017377	4.9978e-06	sanidine	12	875.43	0.246982	97.785	0.197212	1.07849	0.117848	0.104814	0.125334	0.0052742	0.0012942	0.014273	8.92943	0.0186386	99.8256	28.18	0.05837	0.0993765	5.21452e-15	5.83414e-06	25.7394	0.111794	0.203679	25.7399	0.999969	0.0001519
2361-28A	FCs-C1	Fish Canyon Tuff	0.0017377	4.9978e-06	sanidine	12	602.423	0.246982	66.9498	0.179034	0.926756	0.117499	0.084966	0.131102	0.00182	0.001198	0.0169053	8.98319	0.0249235	99.9183	28.3483	0.0780452	0.112413	3.57019e-15	2.72959e-06	74.3112	0.111228	0.270589	74.3114	0.999993	8.36e-05
2361-29A	FCs-C1	Fish Canyon Tuff	0.0017377	4.9978e-06	sanidine	12	730.834	0.241868	81.7203	0.196616	1.08115	0.117499	0.0722553	0.124012	0.0048274	0.0009937	0.0117867	8.91844	0.0219943	99.8086	28.1455	0.0688804	0.105818	4.35784e-15	6.40436e-06	21.7809	0.111912	0.242906	21.7819	0.999938	0.0002071
2361-30A	FCs-C1	Fish Canyon Tuff	0.0017377	4.9978e-06	sanidine	12	954.397	0.252389	106.272	0.202453	1.32651	0.116822	0.148324	0.124784	0.0098256	0.001372	0.0186129	8.94632	0.0176621	99.701	28.2328	0.0553104	0.0977342	5.66708e-15	1e-05	14.5646	0.111444	0.192367	14.5656	0.999913	0.0002497
2362-01A	SRM01	Dacite of Nutras Creek	0.0017377	4.9978e-06	sanidine	12	2158.77	0.270185	238.104	0.203934	3.00842	0.117157	0.602193	0.131102	0.0912022	0.0014638	0.0338007	8.946	0.0079919	98.7537	28.2318	0.0250274	0.0843721	1.26973e-14	4.17e-05	1.64669	0.110389	0.0865746	1.6488	0.998621	0.0010994
2362-02A	SRM01	Dacite of Nutras Creek	0.0017377	4.9978e-06	sanidine	12	1026.87	0.252389	114.581	0.197332	1.40744	0.116494	0.157221	0.124784	0.0115284	0.0010894	0.0183451	8.92515	0.0158137	99.6729	28.1665	0.0495238	0.0944199	6.11017e-15	1.09e-05	9.90394	0.111676	0.173997	9.90522	0.999846	0.0003507
2362-03A	SRM01	Dacite of Nutras Creek	0.0017377	4.9978e-06	sanidine	12	1859.48	0.276586	207.027	0.203484	2.6423	0.116174	0.225174	0.125056	0.0343398	0.0017939	0.0145471	8.92538	0.0092719	99.4553	28.1672	0.0290368	0.085475	1.104e-14	1.82e-05	5.33398	0.11143	0.0994256	5.3348	0.999826	0.0004174
2362-04A	SRM01	Dacite of Nutras Creek	0.0017377	4.9978e-06	sanidine	12	1062.71	0.252389	115.815	0.197341	1.56282	0.117157	0.202393	0.124262	0.0877469	0.0015449	0.0233903	8.9432	0.0159279	97.5453	28.2231	0.04988	0.0947433	6.17601e-15	8.22e-05	1.788	0.109072	0.172071	1.79581	0.995401	0.0018343
2362-05A	SRM01	Dacite of Nutras Creek	0.0017377	4.9978e-06	sanidine	12	1728.44	0.276586	191.681	0.197134	2.47895	0.117157	0.383178	0.124012	0.0481806	0.0017953	0.0267664	8.93582	0.0097423	99.18	28.2	0.0305093	0.086073	1.02217e-14	2.75e-05	3.81358	0.110991	0.104102	3.81487	0.999628	0.0006453
2362-06A	SRM01	Dacite of Nutras Creek	0.0017377	4.9978e-06	sanidine	12	1126.82	0.252389	125.943	0.195455	1.6528	0.117499	0.159079	0.125334	0.0094602	0.0010703	0.0169187	8.91776	0.0142408	99.7574	28.1434	0.0445984	0.0918749	6.7161e-15	8.11899e-06	11.9689	0.111864	0.156829	11.9697	0.999914	0.0002674
2362-07A	SRM01	Dacite of Nutras Creek	0.0017377	4.9978e-06	sanidine	12	1536.14	0.264008	171.536	0.203046	2.1326	0.117848	0.309847	0.12562	0.0035704	0.0013719	0.0242128	8.94245	0.0109875	99.9416	28.2207	0.0344087	0.0875852	9.14741e-15	1.95075e-06	46.4336	0.111761	0.119632	46.4336	0.999997	5.32e-05
2362-08A	SRM01	Dacite of Nutras Creek	0.0017377	4.9978e-06	sanidine	12	1570.94	0.270185	174.614	0.20308	2.08196	0.116822	0.382689	0.12452	0.0454313	0.0012977	0.0293887	8.91263	0.0107408	99.1493	28.1273	0.0336376	0.0870411	9.31156e-15	2.85e-05	2.94536	0.111246	0.117589	2.94749	0.999204	0.0008545
2362-09A	SRM01	Dacite of Nutras Creek	0.0017377	4.9978e-06	sanidine	12	485.301	0.241868	54.0228	0.182308	0.569782	0.116174	0.114983	0.125056	0.0028456	0.0011421	0.0285519	8.96103	0.0312575	99.8366	28.2789	0.097883	0.126865	2.88085e-15	5.46736e-06	43.9174	0.111412	0.341188	43.9183	0.99997	0.0001659
2362-10A	SRM01	Dacite of Nutras Creek	0.0017377	4.9978e-06	sanidine	12	1514.46	0.264008	169.328	0.197853	2.23045	0.116822	0.16387	0.125334	0.0077604	0.0014523	0.0129919	8.92327	0.0108771	99.8533	28.1607	0.034064	0.0872937	9.02966e-15	4.90572e-06	19.7964	0.111902	0.11816	19.7966	0.999982	0.00013
2362-11A	SRM01	Dacite of Nutras Creek	0.0017377	4.9978e-06	sanidine	12	876.686	0.252389	98.2003	0.202399	1.32582	0.116494	0.127987	0.133146	0.0012749	0.0011767	0.0175031	8.91686	0.01893	99.9652	28.1406	0.0592839	0.0998263	5.23668e-15	1.15833e-06	118.386	0.112108	0.208147	118.386	0.999999	3.37e-05
2362-12A	SRM01	Dacite of Nutras Creek	0.0017377	4.9978e-06	sanidine	12	955.757	0.252389	106.796	0.202457	1.31087	0.117157	0.207673	0.134443	0.0075092	0.0010828	0.0261246	8.92188	0.0173747	99.7771	28.1563	0.0544128	0.0970495	5.69507e-15	7.45847e-06	15.5852	0.111834	0.191439	15.5861	0.999925	0.0002339
2362-13A	SRM01	Dacite of Nutras Creek	0.0017377	4.9978e-06	sanidine	12	1220.59	0.264008	136.062	0.195544	1.8009	0.116494	0.0853571	0.125056	0.0035863	0.0010276	0.0084343	8.95574	0.0132385	99.9166	28.2623	0.0414567	0.090691	7.25572e-15	2.78784e-06	30.956	0.111567	0.145361	30.9561	0.999989	0.000104
2362-14A	SRM01	Dacite of Nutras Creek	0.0017377	4.9978e-06	sanidine	12	821.055	0.25807	91.7887	0.202359	1.2558	0.116174	0.187825	0.124784	0.0137673	0.0010895	0.0275216	8.89395	0.0201528	99.5126	28.0688	0.063116	0.101989	4.89477e-15	1.63e-05	8.31297	0.111888	0.222732	8.31559	0.999641	0.0005339
2362-15A	SRM01	Dacite of Nutras Creek	0.0017377	4.9978e-06	sanidine	12	2206.59	0.29	245.767	0.204054	3.12131	0.116495	0.433923	0.131901	0.0279377	0.0012729	0.0237554	8.93786	0.0077042	99.6328	28.2063	0.0241266	0.0840401	1.31059e-14	1.23e-05	4.77922	0.111473	0.0840769	4.77984	0.999845	0.0004301
2362-16A	SRM01	Dacite of Nutras Creek	0.0017377	4.9978e-06	sanidine	12	424.155	0.232594	47.0049	0.181927	0.427386	0.117156	-0.0156439	0.125056	0.0049922	0.0009883	-0.0044812	8.98384	0.0357256	99.6443	28.3503	0.111871	0.138064	2.50661e-15	1.19e-05	20.0979	0.110915	0.390971	20.101	0.999811	0.0003829
2362-17A	SRM01	Dacite of Nutras Creek	0.0017377	4.9978e-06	sanidine	12	1185.4	0.25807	132.45	0.19748	1.7893	0.115862	0.0436074	0.12562	0.005015	0.0012942	0.0044347	8.93112	0.0137984	99.8763	28.1852	0.0432119	0.0913142	7.06309e-15	4.13523e-06	26.8294	0.11183	0.150705	26.8296	0.999984	0.0001173
2362-18A	SRM01	Dacite of Nutras Creek	0.0017377	4.9978e-06	sanidine	12	1960	0.283196	218.524	0.203643	2.84842	0.117157	0.315811	0.124784	0.0194496	0.0012132	0.0194737	8.93596	0.0086194	99.7129	28.2004	0.0269929	0.0848914	1.16531e-14	9.61072e-06	6.55731	0.111586	0.0943208	6.55787	0.999897	0.0003377
2362-19A	SRM01	Dacite of Nutras Creek	0.0017377	4.9978e-06	sanidine	12	1844.39	0.270185	203.184	0.195834	2.57493	0.117499	0.131311	0.12452	0.105778	0.0016329	0.0087271	8.91479	0.0090493	98.2914	28.1341	0.0283403	0.0851523	1.08351e-14	5.72e-05	1.56299	0.110257	0.0975067	1.56582	0.99806	0.0014088
2362-20A	SRM01	Dacite of Nutras Creek	0.0017377	4.9978e-06	sanidine	12	1253.96	0.264008	140.425	0.197055	1.74514	0.117848	0.0942545	0.126212	0.0033222	0.0013718	0.0090674	8.91545	0.0130112	99.925	28.1362	0.0407479	0.0900505	7.48839e-15	2.50644e-06	44.2867	0.112081	0.141924	44.2868	0.999995	7.06e-05
2362-21A	SRM01	Dacite of Nutras Creek	0.0017377	4.9978e-06	sanidine	12	1012.91	0.25807	112.943	0.197319	1.31421	0.117499	-0.03295	0.133146	0.0027592	0.001264	-0.0039426	8.95313	0.0161871	99.9163	28.2542	0.0506906	0.0952471	6.02289e-15	2.79723e-06	45.4614	0.111599	0.176585	45.4615	0.999992	8.09e-05
2362-22A	SRM01	Dacite of Nutras Creek	0.0017377	4.9978e-06	sanidine	12	676.101	0.241868	76.0016	0.202273	0.973861	0.116822	0.164554	0.124262	0.0012203	0.0012052	0.0292817	8.88478	0.0243572	99.9597	28.0401	0.0762846	0.110564	4.05291e-15	1.34245e-06	135.217	0.112507	0.268586	135.217	0.999998	3.53e-05
2362-23A	SRM01	Dacite of Nutras Creek	0.0017377	4.9978e-06	sanidine	12	831.194	0.252389	92.8803	0.202366	1.19994	0.116494	0.25568	0.124784	0.0030611	0.001016	0.037243	8.93326	0.0199521	99.9073	28.1919	0.062483	0.101874	4.953e-15	3.0997e-06	40.4539	0.111837	0.220025	40.4542	0.999985	0.0001036
2362-24A	SRM01	Dacite of Nutras Creek	0.0017377	4.9978e-06	sanidine	12	807.195	0.246982	90.1144	0.196665	1.28147	0.117157	0.0847704	0.125056	0.0049505	0.0012791	0.0127316	8.93404	0.0201706	99.8238	28.1944	0.0631675	0.1023	4.8055e-15	5.89579e-06	27.3212	0.111734	0.220413	27.3219	0.999968	0.0001556
2362-25A	SRM01	Dacite of Nutras Creek	0.0017377	4.9978e-06	sanidine	12	859.578	0.252389	95.8916	0.195715	1.24607	0.116822	0.0692243	0.12452	0.006279	0.0010161	0.0097763	8.9373	0.0187298	99.7866	28.2046	0.0586548	0.0996004	5.11358e-15	7.14001e-06	16.9832	0.111652	0.206238	16.9841	0.999926	0.0002463
2362-26A	SRM01	Dacite of Nutras Creek	0.0017377	4.9978e-06	sanidine	12	913.145	0.246982	102.471	0.195273	1.42219	0.117499	0.114494	0.125334	0.0007556	0.0012639	0.0151369	8.90216	0.0175555	99.9831	28.0945	0.0549807	0.0972248	5.46444e-15	5.5865e-07	251.991	0.112313	0.192509	251.991	1	1.51e-05
2362-27A	SRM01	Dacite of Nutras Creek	0.0017377	4.9978e-06	sanidine	12	1050.09	0.252389	116.554	0.202528	1.45819	0.117157	0.316105	0.125056	0.0280767	0.0012212	0.0367556	8.93149	0.0160073	99.2182	28.1864	0.0501295	0.0947867	6.21544e-15	2.62e-05	4.52304	0.111088	0.17545	4.52614	0.999249	0.0007283
2362-28A	SRM01	Dacite of Nutras Creek	0.0017377	4.9978e-06	sanidine	12	700.966	0.252389	78.3258	0.202284	1.07653	0.117157	0.44634	0.134443	0.0063137	0.0010336	0.0772867	8.92112	0.0236313	99.767	28.1539	0.0740066	0.109242	4.17686e-15	7.79624e-06	19.4621	0.111832	0.260811	19.4635	0.99991	0.0002555
2362-29A	SRM01	Dacite of Nutras Creek	0.0017377	4.9978e-06	sanidine	12	363.61	0.241868	40.7263	0.202138	0.477539	0.117156	-0.0055731	0.12452	0.0016869	0.0009828	-0.0018567	8.90799	0.0452395	99.8601	28.1128	0.141681	0.162824	2.1718e-15	4.67939e-06	59.3597	0.112102	0.500857	59.3612	0.999964	0.0001489
2362-30A	SRM01	Dacite of Nutras Creek	0.0017377	4.9978e-06	sanidine	12	844.983	0.252389	94.3877	0.19719	1.18519	0.115557	0.116449	0.124784	0.0047589	0.0010161	0.0167452	8.93028	0.0191498	99.8395	28.1826	0.0599709	0.100331	5.03339e-15	5.37006e-06	22.9744	0.111799	0.211077	22.9751	0.999958	0.0001841
2362-31A	SRM01	Dacite of Nutras Creek	0.0017377	4.9978e-06	sanidine	12	596.883	0.237065	66.4192	0.196045	0.736468	0.116494	0.179905	0.125334	0.0015727	0.0009828	0.0367861	8.97337	0.027125	99.9371	28.3176	0.0849403	0.117245	3.54192e-15	2.10139e-06	80.5545	0.111371	0.297879	80.5546	0.999993	6.58e-05
2363-01A	SRM02	Dacite of Nutras Creek	0.0017377	4.9978e-06	sanidine	12	945.001	0.252389	104.934	0.197261	1.25108	0.117848	-0.005182	0.125334	0.0106199	0.0013721	-0.0006721	8.96771	0.0174993	99.6637	28.2998	0.0547987	0.0976025	5.59578e-15	1.13e-05	13.0872	0.111136	0.189906	13.0884	0.999895	0.0002872
2363-02A	SRM02	Dacite of Nutras Creek	0.0017377	4.9978e-06	sanidine	12	552.704	0.237065	61.7064	0.181985	0.785933	0.115862	0.160546	0.125913	-0.0008221	0.0011285	0.0354247	8.95486	0.027281	100.061	28.2596	0.0854315	0.117488	3.29061e-15	-2.03929e-06	-102.29	0.111739	0.29808	-102.29	0.999996	6.04e-05
2363-03A	SRM02	Dacite of Nutras Creek	0.0017377	4.9978e-06	sanidine	12	1051.71	0.252389	116.255	0.197345	1.50834	0.116822	-0.0068442	0.129576	0.0298718	0.0016203	-0.0008019	8.96216	0.0159496	99.1518	28.2824	0.0499461	0.0949211	6.19953e-15	2.84e-05	5.48542	0.110634	0.171468	5.48786	0.999512	0.0006126
2363-04A	SRM02	Dacite of Nutras Creek	0.0017377	4.9978e-06	sanidine	12	1189.97	0.25807	132.551	0.196983	1.73777	0.116174	0.187043	0.133572	0.004878	0.0010515	0.0192344	8.95961	0.0136933	99.8867	28.2744	0.0428809	0.0913811	7.06854e-15	3.78774e-06	23.9826	0.111486	0.15021	23.9829	0.99998	0.0001306
2363-05A	SRM02	Dacite of Nutras Creek	0.0017377	4.9978e-06	sanidine	12	737.52	0.241868	82.091	0.197117	1.00218	0.116174	0.277386	0.125334	0.0019659	0.0009936	0.0460769	8.97133	0.0220736	99.9411	28.3112	0.0691224	0.106332	4.37765e-15	1.96605e-06	70.4201	0.1114	0.242395	70.4202	0.999994	6.3e-05
2363-06A	SRM02	Dacite of Nutras Creek	0.0017377	4.9978e-06	sanidine	12	1974.76	0.270185	220.001	0.203664	2.73454	0.117848	0.341819	0.125913	0.0133006	0.0016193	0.0211948	8.95132	0.0086906	99.8084	28.2485	0.0272153	0.0850914	1.1732e-14	6.40951e-06	12.9312	0.111501	0.0935969	12.9314	0.999974	0.0001548
2363-07A	SRM02	Dacite of Nutras Creek	0.0017377	4.9978e-06	sanidine	12	1524.39	0.276586	170.264	0.196874	2.02069	0.116174	0.138742	0.125056	0.0150312	0.0011291	0.0111241	8.9195	0.0106557	99.7102	28.1489	0.0333709	0.0869947	9.07962e-15	9.70051e-06	7.79949	0.111789	0.117065	7.8002	0.999887	0.0003608
2363-08A	SRM02	Dacite of Nutras Creek	0.0017377	4.9978e-06	sanidine	12	704.813	0.246982	78.745	0.197099	0.932263	0.116822	0.212366	0.125334	0.0009839	0.0009882	0.0368301	8.94074	0.0229395	99.9746	28.2154	0.0718376	0.107914	4.19922e-15	8.42852e-07	171.008	0.111819	0.252789	171.008	0.999999	2.84e-05
2363-09A	SRM02	Dacite of Nutras Creek	0.0017377	4.9978e-06	sanidine	12	299.23	0.232594	33.6141	0.194955	0.327669	0.117499	0.0010755	0.125913	0.0026798	0.0011838	0.0004371	8.87033	0.0530263	99.7309	27.9948	0.166078	0.1843	1.79253e-15	9.00572e-06	44.802	0.112432	0.585268	44.8051	0.999915	0.0002306
2363-10A	SRM02	Dacite of Nutras Creek	0.0017377	4.9978e-06	sanidine	12	1041.96	0.252389	116.767	0.20253	1.53302	0.116494	0.108236	0.125334	0.0060457	0.0009992	0.0126731	8.90095	0.0158257	99.8329	28.0907	0.0495635	0.0942581	6.2268e-15	5.589e-06	17.6303	0.11216	0.175163	17.6309	0.999951	0.0001901
2363-11A	SRM02	Dacite of Nutras Creek	0.0017377	4.9978e-06	sanidine	12	663.956	0.246982	74.2889	0.196577	0.724274	0.115557	0.141871	0.131901	0.0025557	0.0009991	0.0261192	8.92053	0.0242106	99.8951	28.152	0.0758208	0.110475	3.96159e-15	3.50578e-06	44.2275	0.111983	0.267263	44.2279	0.999982	0.0001171
2363-12A	SRM02	Dacite of Nutras Creek	0.0017377	4.9978e-06	sanidine	12	780.016	0.252389	86.9872	0.202331	1.15431	0.117499	0.133462	0.124784	0.0059037	0.0013719	0.0209921	8.94003	0.021548	99.784	28.2131	0.06748	0.105059	4.63875e-15	7.22712e-06	24.6935	0.111615	0.234881	24.6944	0.999955	0.0001806
2363-13A	SRM02	Dacite of Nutras Creek	0.0017377	4.9978e-06	sanidine	12	960.49	0.246982	106.628	0.197272	1.12098	0.115862	0.206597	0.124262	0.0096419	0.0010703	0.0265295	8.97418	0.017059	99.7109	28.3201	0.0534192	0.0968825	5.68615e-15	9.67601e-06	11.7891	0.111109	0.186822	11.7903	0.999874	0.0003004
2363-14A	SRM02	Dacite of Nutras Creek	0.0017377	4.9978e-06	sanidine	12	1045.84	0.252389	116.951	0.196358	1.48031	0.116822	0.256267	0.125334	0.0035694	0.0010276	0.0300143	8.92713	0.0153979	99.9119	28.1728	0.0482214	0.0937585	6.23661e-15	2.94552e-06	34.2292	0.111919	0.169655	34.2294	0.999988	0.0001003
2363-15A	SRM02	Dacite of Nutras Creek	0.0017377	4.9978e-06	sanidine	12	1018.28	0.252389	113.727	0.197325	1.47775	0.115862	0.289314	0.12562	0.0159576	0.0011564	0.0348583	8.90572	0.0159324	99.5482	28.1057	0.0498972	0.0944699	6.0647e-15	1.51e-05	7.66455	0.11178	0.175302	7.66628	0.999739	0.0004575
2363-16A	SRM02	Dacite of Nutras Creek	0.0017377	4.9978e-06	sanidine	12	1267.24	0.25807	141.571	0.202739	1.76668	0.117499	0.109312	0.131102	0.0068668	0.0010828	0.010588	8.92956	0.0131464	99.843	28.1803	0.0411702	0.0903537	7.54953e-15	5.25233e-06	16.6875	0.111812	0.144674	16.688	0.999962	0.0001719
2363-17A	SRM02	Dacite of Nutras Creek	0.0017377	4.9978e-06	sanidine	12	1189.65	0.25807	132.411	0.19455	1.6529	0.117157	0.144804	0.125913	0.0093668	0.0012944	0.0150017	8.9563	0.013648	99.7717	28.2641	0.042739	0.0912888	7.0611e-15	7.64124e-06	14.4785	0.111398	0.148548	14.4791	0.999947	0.0002189
2363-18A	SRM02	Dacite of Nutras Creek	0.0017377	4.9978e-06	sanidine	12	534.585	0.232594	59.3786	0.179626	0.778361	0.116174	-0.0983611	0.136251	0.003353	0.0009829	-0.0227323	8.97743	0.0279272	99.8028	28.3303	0.0874518	0.119101	3.16648e-15	6.59811e-06	28.8024	0.111171	0.305674	28.8035	0.999944	0.0002151
2363-19A	SRM02	Dacite of Nutras Creek	0.0017377	4.9978e-06	sanidine	12	1226.29	0.252389	137.055	0.194118	1.52811	0.116494	0.141968	0.125334	0.001535	0.0013718	0.0142458	8.93693	0.0131641	99.9682	28.2034	0.0412252	0.0904369	7.30873e-15	1.05827e-06	107.287	0.11186	0.143148	107.287	0.999999	2.76e-05
2363-20A	SRM02	Dacite of Nutras Creek	0.0017377	4.9978e-06	sanidine	12	2688.65	0.304138	300.636	0.19991	3.88502	0.117157	0.309749	0.12562	0.0116793	0.00122	0.0141749	8.92455	0.0061776	99.877	28.1646	0.0193464	0.0826797	1.6032e-14	4.11253e-06	11.2422	0.111913	0.067463	11.2423	0.999982	0.0001688
2363-21A	SRM02	Dacite of Nutras Creek	0.0017377	4.9978e-06	sanidine	12	1185.08	0.252389	131.297	0.202648	1.58553	0.115862	0.172474	0.124784	0.0369144	0.0012078	0.0180793	8.93501	0.0142201	99.0777	28.1974	0.0445323	0.0919767	7.00169e-15	3.09e-05	3.36271	0.110887	0.155833	3.36603	0.998928	0.000866
2363-22A	SRM02	Dacite of Nutras Creek	0.0017377	4.9978e-06	sanidine	12	769.542	0.252389	85.838	0.202325	0.945441	0.116822	0.120458	0.12452	0.0010664	0.001016	0.0193282	8.95438	0.0216323	99.9664	28.2581	0.0677425	0.105325	4.57748e-15	1.11829e-06	121.204	0.11164	0.238019	121.204	0.999998	3.73e-05
2363-23A	SRM02	Dacite of Nutras Creek	0.0017377	4.9978e-06	sanidine	12	318.448	0.237065	35.4685	0.193995	0.436728	0.115862	-0.0272791	0.134443	0.0010852	0.000938	-0.0105971	8.96098	0.0501596	99.8933	28.2787	0.157075	0.176596	1.89143e-15	3.56733e-06	85.5592	0.111476	0.552088	85.5601	0.999979	0.0001174
2363-24A	SRM02	Dacite of Nutras Creek	0.0017377	4.9978e-06	sanidine	12	380.025	0.232594	42.6424	0.202143	0.458068	0.117156	0.138449	0.125056	0.002238	0.0009882	0.0447516	8.89042	0.043107	99.8434	28.0578	0.135006	0.156971	2.27399e-15	5.23761e-06	51.0591	0.112305	0.478069	51.0607	0.999956	0.0001535
2363-25A	SRM02	Dacite of Nutras Creek	0.0017377	4.9978e-06	sanidine	12	1287.8	0.252389	143.738	0.197584	1.80808	0.116494	0.191638	0.125334	0.0011676	0.0013718	0.0183906	8.95006	0.0127784	99.9813	28.2446	0.0400163	0.0899966	7.6651e-15	6.18416e-07	174.841	0.11171	0.138877	174.841	1	1.58e-05
2363-26A	SRM02	Dacite of Nutras Creek	0.0017377	4.9978e-06	sanidine	12	457.059	0.241868	50.6394	0.18159	0.613051	0.116822	0.0451718	0.124012	0.0031852	0.0012343	0.0123091	8.99973	0.0334715	99.7972	28.4001	0.104809	0.132493	2.70045e-15	6.78637e-06	40.515	0.110889	0.362542	40.5162	0.99996	0.0001908
2363-27A	SRM02	Dacite of Nutras Creek	0.0017377	4.9978e-06	sanidine	12	1329.35	0.264008	148.314	0.197629	1.74996	0.116822	0.160839	0.125056	0.0237239	0.0011779	0.0150503	8.90826	0.0122638	99.4734	28.1136	0.0384076	0.0889584	7.90914e-15	1.76e-05	5.12866	0.111664	0.134747	5.13021	0.999655	0.000571
2363-28A	SRM02	Dacite of Nutras Creek	0.0017377	4.9978e-06	sanidine	12	844.859	0.241868	93.5353	0.1957	1.10485	0.116494	0.0649222	0.124784	0.0272109	0.0015358	0.0096364	8.9383	0.0195357	99.0421	28.2077	0.0611785	0.101114	4.98797e-15	3.21e-05	5.73562	0.110806	0.211213	5.73919	0.999323	0.0006769
2363-29A	SRM02	Dacite of Nutras Creek	0.0017377	4.9978e-06	sanidine	12	1210.16	0.252389	132.928	0.202662	1.67257	0.115862	0.934332	0.125335	0.0862675	0.0020684	0.0976211	8.90672	0.0145041	97.915	28.1088	0.0454239	0.0921932	7.08868e-15	6.98e-05	2.46458	0.109934	0.153911	2.46911	0.998056	0.0011473
2363-30A	SRM02	Dacite of Nutras Creek	0.0017377	4.9978e-06	sanidine	12	606.839	0.241868	67.4148	0.197043	0.782295	0.116174	0.227814	0.134004	0.0152239	0.0011224	0.0469687	8.92843	0.0268477	99.2715	28.1768	0.0840784	0.116346	3.59504e-15	2.44e-05	7.7775	0.111186	0.295047	7.78254	0.999281	0.0006926
2363-31A	SRM02	Dacite of Nutras Creek	0.0017377	4.9978e-06	sanidine	12	2221.95	0.296985	247.95	0.20409	3.08925	0.115862	0.384351	0.124262	0.0175671	0.001235	0.0215531	8.93335	0.0076294	99.7737	28.1922	0.0238926	0.0839349	1.32225e-14	7.57386e-06	7.47375	0.111687	0.0834042	7.47411	0.999938	0.0002868
2364-01A	SRM03	Pagosa Peak Dacite (South)	0.0017377	4.9978e-06	sanidine	12	3206.19	0.29	357.582	0.217413	4.48922	0.116822	0.398333	0.124262	0.0245897	0.0019713	0.0155003	8.93872	0.0057737	99.778	28.209	0.018081	0.0825154	1.90688e-14	7.42732e-06	8.33959	0.111625	0.0614811	8.33977	0.999973	0.0001596
2364-02A	SRM03	Pagosa Peak Dacite (South)	0.0017377	4.9978e-06	sanidine	12	2893.04	0.296985	321.717	0.216669	3.93547	0.116822	0.207477	0.12452	0.0350944	0.0018825	0.0089769	8.95253	0.0063798	99.6416	28.2523	0.0199786	0.0830708	1.71563e-14	1.2e-05	5.46832	0.1113	0.0681374	5.46868	0.999922	0.000283
2364-03A	SRM03	Pagosa Peak Dacite (South)	0.0017377	4.9978e-06	sanidine	12	1129.32	0.252389	125.878	0.202602	1.5875	0.118204	1.49761	0.124784	0.0158901	0.0011359	0.165669	8.93346	0.0147948	99.6552	28.1926	0.0463323	0.0928496	6.71272e-15	1.15e-05	8.9046	0.111553	0.162534	8.90585	0.999834	0.0003453
2364-04A	SRM03	Pagosa Peak Dacite (South)	0.0017377	4.9978e-06	sanidine	12	2306.92	0.29	257.376	0.204244	3.14855	0.117499	0.367339	0.125334	0.0256223	0.0017933	0.019889	8.92663	0.0075008	99.6772	28.1712	0.0234901	0.083764	1.37251e-14	1.08e-05	7.25949	0.111663	0.0803604	7.25985	0.999939	0.000271
2364-05A	SRM03	Pagosa Peak Dacite (South)	0.0017377	4.9978e-06	sanidine	12	1621.03	0.270185	178.185	0.208633	2.23645	0.117499	0.276506	0.131498	0.0909639	0.0014637	0.0216327	8.93824	0.0108844	98.334	28.2075	0.034086	0.0874246	9.50211e-15	5.58e-05	1.64247	0.110015	0.118289	1.64645	0.997417	0.0014306
2364-06A	SRM03	Pagosa Peak Dacite (South)	0.0017377	4.9978e-06	sanidine	12	2632.47	0.318904	289.793	0.198717	3.71283	0.116495	0.398724	0.124012	0.126301	0.0018978	0.0191877	8.94694	0.0065674	98.5761	28.2348	0.0205663	0.083166	1.54539e-14	4.77e-05	1.52395	0.110179	0.0696463	1.52539	0.998958	0.0013834
2364-07A	SRM03	Pagosa Peak Dacite (South)	0.0017377	4.9978e-06	sanidine	12	2537.68	0.296985	282.7	0.210157	3.4891	0.117499	0.215984	0.12452	0.0287002	0.0013733	0.0106625	8.93897	0.0069161	99.667	28.2098	0.0216586	0.0833747	1.50756e-14	1.11e-05	4.92833	0.111497	0.0752682	4.92881	0.999883	0.0003694
2364-08A	SRM03	Pagosa Peak Dacite (South)	0.0017377	4.9978e-06	sanidine	12	759.525	0.246982	84.1743	0.202315	1.04447	0.117157	0.0097774	0.12452	0.0215098	0.0011637	0.0016217	8.93925	0.0221065	99.155	28.2107	0.0692293	0.106185	4.48878e-15	2.83e-05	5.5284	0.110921	0.242585	5.53327	0.999039	0.0007889
2364-09A	SRM03	Pagosa Peak Dacite (South)	0.0017377	4.9978e-06	sanidine	12	560.276	0.237065	61.9271	0.197019	0.714145	0.116822	0.0249325	0.134004	0.0165732	0.0011027	0.0056231	8.95985	0.0292917	99.1185	28.2752	0.0917275	0.122172	3.3024e-15	2.95e-05	6.8473	0.110625	0.321005	6.85416	0.998903	0.000815
2364-10A	SRM03	Pagosa Peak Dacite (South)	0.0017377	4.9978e-06	sanidine	12	890.586	0.25807	98.5267	0.197217	1.22001	0.117157	0.107747	0.124784	0.0194069	0.0010899	0.0152849	8.9731	0.0184798	99.3561	28.3167	0.0578684	0.0993973	5.25416e-15	2.16e-05	5.81259	0.110727	0.202289	5.81573	0.999395	0.0007145
2364-11A	SRM03	Pagosa Peak Dacite (South)	0.0017377	4.9978e-06	sanidine	12	1706.59	0.283196	190.077	0.208772	2.35337	0.117848	0.0783173	0.124784	0.0227727	0.0016198	0.005761	8.93511	0.0102754	99.6041	28.1977	0.0321788	0.086673	1.01363e-14	1.33e-05	7.23987	0.111475	0.111101	7.2406	0.999882	0.0003425
2364-12A	SRM03	Pagosa Peak Dacite (South)	0.0017377	4.9978e-06	sanidine	12	1324.1	0.264008	147.284	0.202793	1.77769	0.115862	0.111854	0.125334	0.0217799	0.0014529	0.0106226	8.93862	0.0128092	99.5133	28.2087	0.0401137	0.0899491	7.85426e-15	1.63e-05	6.82741	0.11133	0.139149	6.82864	0.999792	0.0004187
2364-13A	SRM03	Pagosa Peak Dacite (South)	0.0017377	4.9978e-06	sanidine	12	1739.01	0.270185	193.099	0.203302	2.53766	0.117499	0.228108	0.12452	0.0341313	0.0017066	0.0165589	8.946	0.0099097	99.4218	28.2318	0.031033	0.0863443	1.02974e-14	1.94e-05	5.12004	0.111135	0.106443	5.12102	0.999784	0.0004432
2364-14A	SRM03	Pagosa Peak Dacite (South)	0.0017377	4.9978e-06	sanidine	12	2057.91	0.29	229.791	0.203808	2.87979	0.115557	0.30095	0.124784	0.0114142	0.0015349	0.0183652	8.93381	0.0082986	99.8427	28.1937	0.0259884	0.0845593	1.22541e-14	5.26042e-06	14.3536	0.111758	0.0898215	14.3538	0.99998	0.0001541
2364-15A	SRM03	Pagosa Peak Dacite (South)	0.0017377	4.9978e-06	sanidine	12	849.328	0.252389	94.5216	0.192379	1.21322	0.116494	-0.0743086	0.124784	0.0060576	0.0010395	-0.0110282	8.95815	0.0187489	99.7822	28.2699	0.0587127	0.099784	5.04059e-15	7.28714e-06	17.2412	0.111387	0.205722	17.2421	0.999929	0.0002491
2364-16A	SRM03	Pagosa Peak Dacite (South)	0.0017377	4.9978e-06	sanidine	12	1714.44	0.270185	190.732	0.203273	2.4054	0.116822	0.161034	0.125334	0.0214165	0.0011499	0.0118527	8.94796	0.0098371	99.6324	28.238	0.0308057	0.086279	1.01712e-14	1.23e-05	5.57057	0.111347	0.107753	5.57145	0.999813	0.000414
2364-17A	SRM03	Pagosa Peak Dacite (South)	0.0017377	4.9978e-06	sanidine	12	2566.93	0.304138	284.926	0.204729	3.3767	0.117499	0.293128	0.125056	0.0480714	0.0013755	0.014448	8.95152	0.0067121	99.4469	28.2491	0.0210195	0.0833186	1.51944e-14	1.85e-05	2.93805	0.111095	0.0728364	2.93883	0.999693	0.0006564
2364-18A	SRM03	Pagosa Peak Dacite (South)	0.0017377	4.9978e-06	sanidine	12	1290.11	0.264008	143.612	0.197086	2.03603	0.116822	0.261449	0.125913	0.0147493	0.0011702	0.0255767	8.94614	0.0126795	99.6713	28.2323	0.0397068	0.0898282	7.65843e-15	1.1e-05	8.42152	0.111413	0.138778	8.42247	0.999864	0.0003585
2364-19A	SRM03	Pagosa Peak Dacite (South)	0.0017377	4.9978e-06	sanidine	12	2426.63	0.304138	270.127	0.204462	3.3945	0.115862	0.0573936	0.125334	0.0405056	0.0018829	0.0029872	8.93089	0.007195	99.5029	28.1845	0.0225325	0.0835369	1.44051e-14	1.66e-05	4.70177	0.111414	0.0767354	4.70231	0.999867	0.0004356
2364-20A	SRM03	Pagosa Peak Dacite (South)	0.0017377	4.9978e-06	sanidine	12	1949.97	0.29	216.78	0.203618	2.86317	0.115862	0.0954278	0.12452	0.020648	0.0012133	0.0061914	8.95924	0.0087139	99.6871	28.2733	0.0272877	0.0851812	1.15603e-14	1.05e-05	6.05674	0.111267	0.0951155	6.05735	0.999877	0.0003841
2364-21A	SRM03	Pagosa Peak Dacite (South)	0.0017377	4.9978e-06	sanidine	12	1502.33	0.264008	167.178	0.197829	2.14548	0.115862	0.179709	0.12452	0.0217888	0.0012279	0.0151247	8.9404	0.0109484	99.574	28.2143	0.0342862	0.0875205	8.91518e-15	1.43e-05	5.84066	0.111375	0.119653	5.84171	0.99979	0.0004421
2364-22A	SRM03	Pagosa Peak Dacite (South)	0.0017377	4.9978e-06	sanidine	12	782.946	0.246982	86.8606	0.18042	0.987432	0.116494	0.199166	0.125056	0.0100639	0.0014523	0.0322815	8.97278	0.0195368	99.63	28.3157	0.0611786	0.101358	4.63205e-15	1.24e-05	15.1844	0.111036	0.210134	15.1856	0.999904	0.000312
2364-23A	SRM03	Pagosa Peak Dacite (South)	0.0017377	4.9978e-06	sanidine	12	1149.47	0.25807	128.191	0.19596	1.6885	0.116822	0.145293	0.12562	0.0017147	0.001249	0.0159628	8.95583	0.0141694	99.9632	28.2626	0.0443721	0.092061	6.83609e-15	1.22735e-06	90.207	0.111618	0.154534	90.2069	0.999999	3.62e-05
2364-24A	SRM03	Pagosa Peak Dacite (South)	0.0017377	4.9978e-06	sanidine	12	385.863	0.230489	42.755	0.196952	0.536346	0.116494	0.0990455	0.125334	0.0042505	0.001227	0.0326387	8.98891	0.0426799	99.6858	28.3662	0.133646	0.156253	2.28001e-15	1.05e-05	30.8261	0.110899	0.464595	30.829	0.999887	0.0002493
2364-25A	SRM03	Pagosa Peak Dacite (South)	0.0017377	4.9978e-06	sanidine	12	583.858	0.246982	65.4138	0.194578	0.825859	0.116494	0.0070398	0.12562	0.0089905	0.0010337	0.0015174	8.87689	0.0271267	99.5409	28.0154	0.0849596	0.11667	3.48835e-15	1.54e-05	11.8358	0.112135	0.300503	11.8391	0.999678	0.0005034
2364-26A	SRM03	Pagosa Peak Dacite (South)	0.0017377	4.9978e-06	sanidine	12	1579.34	0.270185	176.232	0.203099	2.16663	0.116494	0.277679	0.125334	0.0136283	0.0016194	0.0222245	8.93182	0.0107911	99.7523	28.1874	0.033794	0.0872586	9.39801e-15	8.29043e-06	12.5081	0.111682	0.116529	12.5085	0.999957	0.0002009
2364-27A	SRM03	Pagosa Peak Dacite (South)	0.0017377	4.9978e-06	sanidine	12	2082.66	0.276586	231.458	0.203832	3.00468	0.116495	0.34925	0.12452	0.0404093	0.0012819	0.0212912	8.93904	0.0081637	99.4306	28.21	0.0255658	0.0844746	1.23431e-14	1.91e-05	3.28542	0.111232	0.0890763	3.28648	0.999633	0.000603
2364-28A	SRM03	Pagosa Peak Dacite (South)	0.0017377	4.9978e-06	sanidine	12	1462.08	0.270185	162.892	0.202951	1.97703	0.116822	0.277777	0.125334	0.0191884	0.0015353	0.0240799	8.93382	0.0116285	99.6188	28.1937	0.0364165	0.0883235	8.68664e-15	1.28e-05	8.33174	0.111507	0.125978	8.33254	0.999886	0.0003255
2364-29A	SRM03	Pagosa Peak Dacite (South)	0.0017377	4.9978e-06	sanidine	12	2465.99	0.29	275.234	0.204553	3.58695	0.11526	0.357561	0.126212	0.0064398	0.0016191	0.0183515	8.94568	0.0069907	99.9307	28.2308	0.021892	0.083493	1.46775e-14	2.31381e-06	28.7039	0.111708	0.0752578	28.704	0.999997	6.41e-05
2364-30A	SRM03	Pagosa Peak Dacite (South)	0.0017377	4.9978e-06	sanidine	12	1096.7	0.252389	122.414	0.195425	1.64257	0.116822	0.0943523	0.12562	0.0032408	0.0010576	0.010892	8.94377	0.0146849	99.9173	28.2248	0.0459871	0.0927573	6.52804e-15	2.76237e-06	35.8307	0.111717	0.161321	35.8309	0.99999	9.17e-05
2364-31A	SRM03	Pagosa Peak Dacite (South)	0.0017377	4.9978e-06	sanidine	12	1193.69	0.25807	132.547	0.196489	1.64149	0.116174	0.149888	0.12452	0.0310554	0.0012509	0.0159922	8.92877	0.0137011	99.2302	28.1779	0.0429076	0.0911523	7.06837e-15	2.58e-05	4.14151	0.111135	0.149837	4.14395	0.999346	0.0007536
2365-01A	FCs-C5	Fish Canyon Tuff	0.0017377	4.9978e-06	sanidine	12	924.123	0.252389	103.164	0.197248	1.17487	0.117157	0.118894	0.125913	0.0053864	0.0010455	0.0163333	8.93503	0.0175523	99.8326	28.1975	0.0549675	0.0974579	5.5015e-15	5.5995e-06	20.7545	0.111732	0.193173	20.7551	0.999957	0.0001861
2365-02A	FCs-C5	Fish Canyon Tuff	0.0017377	4.9978e-06	sanidine	12	943.596	0.241868	104.839	0.202443	1.43842	0.117157	0.136689	0.133572	0.0220261	0.00115	0.0184848	8.93075	0.0177367	99.3121	28.1841	0.0555456	0.0977539	5.59083e-15	2.3e-05	5.4254	0.111202	0.194828	5.42854	0.999356	0.0006219
2365-03A	FCs-C5	Fish Canyon Tuff	0.0017377	4.9978e-06	sanidine	11.9429	1684.32	0.264008	188.707	0.198085	2.43431	0.116822	0.470099	0.131901	0.0058719	0.0010956	0.0353325	8.91006	0.009646	99.9123	28.1193	0.0302092	0.0857532	1.00633e-14	2.9309e-06	22.7981	0.112134	0.106154	22.7982	0.999989	0.0001016
2365-04A	FCs-C5	Fish Canyon Tuff	0.0017377	4.9978e-06	sanidine	12	1274.28	0.25807	142.602	0.197573	1.78654	0.116494	0.324904	0.125056	0.0053477	0.0010455	0.0323389	8.91836	0.012708	99.8894	28.1453	0.0397981	0.0896478	7.60461e-15	3.69624e-06	22.7954	0.112004	0.140047	22.7956	0.999981	0.0001285
2365-05A	FCs-C5	Fish Canyon Tuff	0.0017377	4.9978e-06	sanidine	12	602.411	0.241868	66.7841	0.19704	0.979171	0.115557	0.112734	0.125913	0.0159427	0.0011224	0.0239684	8.94238	0.0271384	99.222	28.2205	0.0849868	0.117089	3.56143e-15	2.61e-05	7.32205	0.110957	0.297815	7.32754	0.999174	0.0007396
2365-06A	FCs-C5	Fish Canyon Tuff	0.0017377	4.9978e-06	sanidine	12	1261.35	0.264008	140.822	0.197556	1.92923	0.115862	0.0642378	0.124784	0.0042853	0.0013719	0.0064795	8.94055	0.0130399	99.9023	28.2148	0.0408361	0.0902889	7.50968e-15	3.26557e-06	33.8312	0.111741	0.141866	33.8314	0.999991	9.13e-05
2365-07A	FCs-C5	Fish Canyon Tuff	0.0017377	4.9978e-06	sanidine	12	957.917	0.246982	107.111	0.197276	1.53863	0.117848	0.13708	0.125056	0.0044094	0.0012942	0.0181921	8.92406	0.0170151	99.8721	28.1631	0.0532864	0.0964386	5.71196e-15	4.27748e-06	32.148	0.111913	0.186009	32.1483	0.999983	0.0001112
2365-08A	FCs-C5	Fish Canyon Tuff	0.0017377	4.9978e-06	sanidine	12	704.106	0.241868	78.6182	0.195126	0.918004	0.115862	-0.0704954	0.12562	0.0042466	0.0010218	-0.0127509	8.93147	0.022749	99.8135	28.1863	0.0712423	0.107457	4.19252e-15	6.23877e-06	23.9249	0.111755	0.250603	23.9259	0.999945	0.0001969
2365-09A	FCs-C5	Fish Canyon Tuff	0.0017377	4.9978e-06	sanidine	12	1275.39	0.25807	142.027	0.202743	1.75006	0.116174	0.0952323	0.124784	0.004464	0.0010576	0.0095385	8.96313	0.0131419	99.8997	28.2855	0.0411537	0.0906113	7.57394e-15	3.35327e-06	25.382	0.111456	0.144203	25.3822	0.999984	0.0001119
2365-10A	FCs-C5	Fish Canyon Tuff	0.0017377	4.9978e-06	sanidine	12	1167.26	0.264008	129.398	0.202631	1.64031	0.116174	0.0029332	0.131901	0.018553	0.0015352	0.0003227	8.97009	0.014659	99.5256	28.3073	0.045904	0.092919	6.9005e-15	1.59e-05	8.39842	0.110953	0.158248	8.39971	0.999823	0.0003851
2365-11A	FCs-C5	Fish Canyon Tuff	0.0017377	4.9978e-06	sanidine	12	888.208	0.246982	99.3091	0.197222	1.25413	0.116822	0.296648	0.124262	0.004049	0.0010276	0.0425404	8.92577	0.0181959	99.8833	28.1685	0.0569839	0.0985422	5.29592e-15	3.90074e-06	30.482	0.111904	0.20057	30.4824	0.999978	0.0001265
2365-12A	FCs-C5	Fish Canyon Tuff	0.0017377	4.9978e-06	sanidine	12	1623.03	0.276586	181.68	0.203163	2.1919	0.116174	0.223317	0.124262	0.0075519	0.001372	0.0175116	8.91399	0.0103617	99.8687	28.1316	0.0324503	0.0866004	9.68858e-15	4.38959e-06	19.5602	0.112036	0.113136	19.5605	0.999983	0.0001313
2365-13A	FCs-C5	Fish Canyon Tuff	0.0017377	4.9978e-06	sanidine	12	361.996	0.232594	40.0607	0.193531	0.691723	0.117499	0.0335366	0.125334	0.0048085	0.0011909	0.0119353	8.99329	0.0447789	99.6119	28.3799	0.140218	0.161929	2.13634e-15	1.3e-05	25.8583	0.110762	0.487435	25.8622	0.999822	0.0003277
2365-14A	FCs-C5	Fish Canyon Tuff	0.0017377	4.9978e-06	sanidine	12	1021.3	0.252389	113.996	0.196335	1.43488	0.116494	0.288337	0.133572	0.011298	0.0010641	0.0360752	8.92325	0.0158079	99.6861	28.1606	0.0495057	0.0943961	6.07917e-15	1.05e-05	10.2133	0.111715	0.174025	10.2145	0.999855	0.0003438
2365-15A	FCs-C5	Fish Canyon Tuff	0.0017377	4.9978e-06	sanidine	12	1096.18	0.252389	122.492	0.197395	1.5876	0.116822	0.078024	0.12452	0.0029379	0.0012942	0.0090883	8.93439	0.0149119	99.9244	28.1955	0.0466987	0.0930401	6.53222e-15	2.52502e-06	47.5888	0.111842	0.162814	47.5889	0.999994	6.85e-05
2365-16A	FCs-C5	Fish Canyon Tuff	0.0017377	4.9978e-06	sanidine	12	612.58	0.237065	67.9652	0.195073	0.770002	0.117157	0.226641	0.125334	0.0116624	0.0012643	0.0476143	8.9561	0.0265676	99.4522	28.2635	0.0831973	0.115881	3.62442e-15	1.83e-05	11.4653	0.111044	0.289672	11.4685	0.999681	0.0004512
2365-17A	FCs-C5	Fish Canyon Tuff	0.0017377	4.9978e-06	sanidine	12	1199.9	0.25807	133.822	0.197492	1.8362	0.116174	-0.0074309	0.12562	0.0023541	0.0012491	-0.0007932	8.95336	0.0136702	99.9419	28.2549	0.0428089	0.0912984	7.1364e-15	1.94011e-06	54.6972	0.111625	0.149163	54.6972	0.999996	5.67e-05
2365-18A	FCs-C5	Fish Canyon Tuff	0.0017377	4.9978e-06	sanidine	12	1606.42	0.270185	179.504	0.203137	2.19161	0.118204	0.418475	0.125056	0.0042654	0.0015347	0.0333122	8.93573	0.0105664	99.9357	28.1996	0.0330903	0.0870205	9.57253e-15	2.14766e-06	45.0556	0.111838	0.11443	45.0556	0.999997	5.49e-05
2365-19A	FCs-C5	Fish Canyon Tuff	0.0017377	4.9978e-06	sanidine	12	774.754	0.246982	86.3457	0.196642	0.995004	0.117157	-0.14715	0.125056	0.0045117	0.0010218	-0.0244044	8.94812	0.0209126	99.8144	28.2385	0.0654893	0.103847	4.60462e-15	6.21136e-06	21.8425	0.111548	0.229997	21.8434	0.999945	0.0002024
2365-20A	FCs-C5	Fish Canyon Tuff	0.0017377	4.9978e-06	sanidine	12	683.799	0.241868	76.2578	0.202274	1.0009	0.115862	0.158786	0.12452	0.0022747	0.0012417	0.0298289	8.95153	0.0244779	99.9146	28.2492	0.0766541	0.111248	4.06666e-15	2.85234e-06	64.8973	0.111617	0.267648	64.8976	0.999992	7.21e-05
2365-21A	FCs-C5	Fish Canyon Tuff	0.0017377	4.9978e-06	sanidine	12	760.075	0.241868	84.3335	0.19713	1.21568	0.115862	0.0510382	0.132725	0.0242958	0.001185	0.008673	8.91939	0.0214958	99.0507	28.1485	0.0673192	0.104815	4.49731e-15	3.18e-05	5.02258	0.111051	0.235948	5.02764	0.998899	0.0008549
2365-22A	FCs-C5	Fish Canyon Tuff	0.0017377	4.9978e-06	sanidine	12	477.249	0.237065	53.4972	0.196987	0.612265	0.114687	0.0443896	0.125334	0.0021397	0.0009882	0.0118999	8.90171	0.0335785	99.8708	28.0931	0.105162	0.132243	2.85288e-15	4.31961e-06	49.4132	0.112193	0.371621	49.414	0.999972	0.0001344
2365-23A	FCs-C5	Fish Canyon Tuff	0.0017377	4.9978e-06	sanidine	12	403.415	0.237065	45.0716	0.181225	0.539592	0.115259	0.0920057	0.125334	0.0026977	0.0009672	0.0292866	8.92608	0.0368906	99.8133	28.1695	0.11553	0.140752	2.40357e-15	6.24719e-06	39.6144	0.111822	0.40643	39.6159	0.999947	0.0002146
2365-24A	FCs-C5	Fish Canyon Tuff	0.0017377	4.9978e-06	sanidine	12	1097.43	0.264008	122.724	0.202576	1.41885	0.117499	0.249325	0.126832	0.0038484	0.0013719	0.0291578	8.92629	0.0152894	99.9079	28.1701	0.0478818	0.0935778	6.54462e-15	3.07713e-06	41.2997	0.111925	0.166841	41.2998	0.999992	8.4e-05
2365-25A	FCs-C5	Fish Canyon Tuff	0.0017377	4.9978e-06	sanidine	12	548.955	0.241868	61.2944	0.196518	0.918594	0.116494	0.115569	0.125056	0.0005034	0.001198	0.0270811	8.94707	0.0295789	99.9866	28.2352	0.0926287	0.122776	3.2687e-15	4.41188e-07	505.089	0.111753	0.323686	505.089	1	1.19e-05
2365-26A	FCs-C5	Fish Canyon Tuff	0.0017377	4.9978e-06	sanidine	12	420.568	0.237065	47.2482	0.180892	0.652486	0.116822	0.18362	0.124262	0.0031673	0.0009622	0.0558397	8.87597	0.034938	99.8016	28.0125	0.109424	0.135522	2.51964e-15	6.63956e-06	35.5632	0.11244	0.387059	35.5646	0.999941	0.000231
2365-27A	FCs-C5	Fish Canyon Tuff	0.0017377	4.9978e-06	sanidine	12	718.232	0.252389	80.1305	0.197106	0.945047	0.117157	0.200731	0.133572	0.0019838	0.0009474	0.0360069	8.94957	0.0225553	99.9334	28.243	0.0706336	0.107175	4.27318e-15	2.22369e-06	61.5799	0.111663	0.248526	61.58	0.999992	8.07e-05
2365-28A	FCs-C5	Fish Canyon Tuff	0.0017377	4.9978e-06	sanidine	12	380.71	0.237065	42.4344	0.196951	0.524939	0.117156	0.164945	0.125913	0.0011537	0.0009991	0.0559133	8.95821	0.0425927	99.9348	28.2701	0.13338	0.155885	2.26293e-15	2.1767e-06	124.256	0.111557	0.468381	124.256	0.999993	6.67e-05
2365-29A	FCs-C5	Fish Canyon Tuff	0.0017377	4.9978e-06	sanidine	12	1177.93	0.252389	131.881	0.202653	1.66667	0.115862	0.131995	0.124784	-0.0005501	0.0012269	0.0144022	8.92576	0.0141533	100.021	28.1684	0.0443238	0.091804	7.03295e-15	-6.96978e-07	-152.454	0.112058	0.155177	-152.454	1	1.94e-05
2365-30A	FCs-C5	Fish Canyon Tuff	0.0017377	4.9978e-06	sanidine	12	1245.57	0.264008	139.126	0.196059	1.73147	0.116494	0.355703	0.125334	0.0022231	0.0012715	0.036804	8.94183	0.0130616	99.9634	28.2188	0.0409039	0.0903297	7.41929e-15	1.21859e-06	85.3559	0.111793	0.142534	85.3559	0.999999	3.69e-05
2365-31A	FCs-C5	Fish Canyon Tuff	0.0017377	4.9978e-06	sanidine	11.9455	775.909	0.246982	86.1938	0.182472	1.07977	0.116174	-0.0742108	0.12452	-0.0003425	0.0011489	-0.0124031	8.99465	0.0196978	100.008	28.3842	0.0616802	0.101816	4.59653e-15	-2.60715e-07	-580.915	0.111186	0.214115	-580.915	1	8.15046e-06
2366-01A	SRM04	Pagosa Peak Dacite (South)	0.0017377	4.9978e-06	sanidine	12	456.668	0.237065	50.5987	0.181245	0.639898	0.117499	-0.0227814	0.12921	-0.0004101	0.0011218	-0.0065001	9.01951	0.0333623	100.024	28.462	0.104464	0.132327	2.69832e-15	-8.09731e-07	-311.209	0.110897	0.362005	-311.21	0.999999	2.39e-05
2366-02A	SRM04	Pagosa Peak Dacite (South)	0.0017377	4.9978e-06	sanidine	12	345.053	0.232594	38.0394	0.179233	0.198155	0.117156	-0.0654111	0.133572	0.0002075	0.0011489	-0.0248347	9.05981	0.0441259	99.966	28.5882	0.138157	0.160447	2.02856e-15	1.13301e-06	301.61	0.11034	0.476054	301.609	0.999999	3.17e-05
2366-03A	SRM04	Pagosa Peak Dacite (South)	0.0017377	4.9978e-06	sanidine	12	1618.75	0.270185	180.104	0.197979	2.40805	0.116495	0.10149	0.124262	0.0219784	0.0016198	0.0081415	8.94396	0.0103309	99.5988	28.2254	0.0323523	0.0868104	9.60456e-15	1.34e-05	7.53784	0.111359	0.111204	7.53854	0.999891	0.0003325
2366-04A	SRM04	Pagosa Peak Dacite (South)	0.0017377	4.9978e-06	sanidine	12	851.356	0.252389	94.7973	0.196199	1.10593	0.117499	-0.0056709	0.133572	0.0031057	0.0010047	-0.0008649	8.96304	0.0190411	99.8901	28.2852	0.0596272	0.10036	5.05534e-15	3.67424e-06	33.221	0.111447	0.209116	33.2214	0.99998	0.0001266
2366-05A	SRM04	Pagosa Peak Dacite (South)	0.0017377	4.9978e-06	sanidine	12	423.103	0.241868	47.2202	0.196965	0.749351	0.116174	0.0004889	0.125056	0.0035873	0.0010047	0.0001497	8.92988	0.0381826	99.7492	28.1813	0.119575	0.14411	2.51815e-15	8.39439e-06	29.1432	0.111703	0.421094	29.1456	0.999896	0.0002664
2366-06A	SRM04	Pagosa Peak Dacite (South)	0.0017377	4.9978e-06	sanidine	12	1047.58	0.264008	117.105	0.202532	1.56872	0.116494	0.191247	0.125056	0.0013315	0.0010394	0.0236303	8.93543	0.0158706	99.9734	28.1987	0.049701	0.0945905	6.24499e-15	8.83508e-07	115.478	0.111884	0.174808	115.478	0.999999	3.15e-05
2366-07A	SRM04	Pagosa Peak Dacite (South)	0.0017377	4.9978e-06	sanidine	12	541.433	0.246982	60.3365	0.196514	0.777673	0.116822	0.136493	0.125056	-0.0009025	0.0011627	0.0327571	8.97159	0.0301033	100.065	28.312	0.094267	0.124158	3.21762e-15	-2.18109e-06	-100.696	0.111535	0.328937	-100.697	0.999995	6.29e-05
2366-08A	SRM04	Pagosa Peak Dacite (South)	0.0017377	4.9978e-06	sanidine	12	550.307	0.241868	61.632	0.195533	0.81927	0.116174	-0.0371543	0.12562	-9.92882e-06	0.0011627	-0.0087325	8.92076	0.0291641	99.9971	28.1528	0.0913339	0.121648	3.28671e-15	9.05908e-08	2385.82	0.112095	0.320344	2385.82	1	2.52888e-06
2366-09A	SRM04	Pagosa Peak Dacite (South)	0.0017377	4.9978e-06	sanidine	12	454.748	0.237065	50.7326	0.180904	0.674317	0.116174	-0.0107552	0.125334	-0.000831	0.0011019	-0.0030721	8.96053	0.0329869	100.054	28.2773	0.103299	0.131087	2.70547e-15	-1.80582e-06	-137.601	0.11166	0.360438	-137.602	0.999997	5.48e-05
2366-10A	SRM04	Pagosa Peak Dacite (South)	0.0017377	4.9978e-06	sanidine	12	121.216	0.225442	13.0467	0.181503	-0.0780819	0.117499	-0.10501	0.123769	0.0035416	0.0009523	-0.116706	9.19549	0.131079	99.0641	29.013	0.410311	0.418579	6.95753e-16	3.13e-05	25.8984	0.107731	1.40373	25.9331	0.998534	0.000952
2366-11A	SRM04	Pagosa Peak Dacite (South)	0.0017377	4.9978e-06	sanidine	12	52.7325	0.217083	5.70906	0.179819	-0.0811305	0.116822	-0.122902	0.125056	0.0029101	0.0009622	-0.312263	9.06103	0.292648	98.1965	28.592	0.916272	0.919898	3.04452e-16	6.04e-05	31.2121	0.108372	3.17667	31.3634	0.99486	0.0017101
2366-12A	SRM04	Pagosa Peak Dacite (South)	0.0017377	4.9978e-06	sanidine	12	322.341	0.230903	35.777	0.190747	0.547065	0.117156	0.195255	0.12452	0.0006027	0.001089	0.0791932	9.00042	0.04933	99.9819	28.4022	0.154467	0.174443	1.90792e-15	6.00134e-07	577.453	0.111086	0.538055	577.453	1	1.65e-05
2366-13A	SRM04	Pagosa Peak Dacite (South)	0.0017377	4.9978e-06	sanidine	12	582.904	0.241868	64.9223	0.193148	0.774329	0.117848	0.0757752	0.12562	0.006414	0.0010336	0.0169491	8.94182	0.0273206	99.6787	28.2187	0.0855574	0.1175	3.46217e-15	1.08e-05	16.967	0.111475	0.300441	16.9691	0.999843	0.0003379
2366-14A	SRM04	Pagosa Peak Dacite (South)	0.0017377	4.9978e-06	sanidine	12	736.566	0.246982	82.2848	0.197118	0.869424	0.115862	0.155364	0.125334	0.0045732	0.0012791	0.0274286	8.92804	0.022125	99.8258	28.1756	0.0692885	0.106149	4.38809e-15	5.82948e-06	30.3568	0.111811	0.241936	30.3574	0.999968	0.0001532
2366-15A	SRM04	Pagosa Peak Dacite (South)	0.0017377	4.9978e-06	sanidine	12	490.663	0.237065	54.3237	0.181604	0.633899	0.116174	0.108236	0.125334	0.0003842	0.0009571	0.0289548	9.02338	0.0309783	99.9891	28.4741	0.0969985	0.126539	2.89698e-15	3.57938e-07	563.345	0.110811	0.337836	563.345	1	1.23e-05
2366-18A	SRM04	Pagosa Peak Dacite (South)	0.0017377	4.9978e-06	sanidine	12	262.388	0.232594	29.5364	0.193506	0.382739	0.114969	0.0446829	0.126212	8.14e-05	0.0009571	0.0219993	8.87589	0.059553	100.001	28.0123	0.186518	0.202932	1.57512e-15	-4.49963e-08	-8384.02	0.112666	0.661237	-8384.02	1	1.4182e-06
2366-16A	SRM04	Pagosa Peak Dacite (South)	0.0017377	4.9978e-06	sanidine	12	868.167	0.246982	97.1743	0.202393	1.3683	0.115557	0.0926902	0.131901	0.0006265	0.0009828	0.0138721	8.92503	0.0190374	99.9859	28.1661	0.0596194	0.100084	5.18211e-15	4.66849e-07	251.064	0.112029	0.21025	251.063	1	1.53e-05
2366-17A	SRM04	Pagosa Peak Dacite (South)	0.0017377	4.9978e-06	sanidine	12	338.095	0.237065	37.5457	0.180862	0.328652	0.117848	0.141186	0.124784	0.0004537	0.0009334	0.0547085	8.99555	0.044481	99.9821	28.387	0.139284	0.161132	2.00224e-15	5.91769e-07	482.943	0.111146	0.486884	482.942	1	2.09e-05
2366-19A	SRM04	Pagosa Peak Dacite (South)	0.0017377	4.9978e-06	sanidine	12	165.441	0.230903	18.1502	0.187666	0.0981433	0.117156	-0.328815	0.134004	0.0001847	0.0009289	-0.263644	9.09195	0.0962172	99.844	28.6888	0.301237	0.312164	9.67917e-16	5.21786e-06	111.994	0.109816	1.04341	111.997	0.999957	0.0001668
2366-20A	SRM04	Pagosa Peak Dacite (South)	0.0017377	4.9978e-06	sanidine	12	134.813	0.226927	15.0501	0.180819	0.0897844	0.115557	-0.0491805	0.12452	-0.0004915	0.0009289	-0.0475733	8.95692	0.110367	100.083	28.266	0.345618	0.354908	8.02594e-16	-2.77835e-06	-256.777	0.111738	1.21337	-256.782	0.999989	9.1e-05
2366-21A	SRM04	Pagosa Peak Dacite (South)	0.0017377	4.9978e-06	sanidine	12	1549.12	0.276586	172.502	0.233669	2.12936	0.117157	0.165728	0.125334	0.0060228	0.0011909	0.0150566	8.96235	0.012446	99.8906	28.283	0.0389746	0.0896364	9.19946e-15	3.65665e-06	21.5595	0.111456	0.136655	21.5598	0.99998	0.0001083
2366-22A	SRM04	Pagosa Peak Dacite (South)	0.0017377	4.9978e-06	sanidine	12	564.499	0.241868	62.8821	0.208816	0.797636	0.118204	0.0026399	0.124784	0.0009144	0.001002	0.0006582	8.96466	0.0304356	99.9521	28.2903	0.0953086	0.124911	3.35347e-15	1.59898e-06	114.939	0.111496	0.334886	114.939	0.999996	4.77e-05
2366-23A	SRM04	Pagosa Peak Dacite (South)	0.0017377	4.9978e-06	sanidine	12	744.866	0.252389	83.2167	0.2281	1.01713	0.116822	0.0226837	0.124784	0.0024941	0.0010075	0.0042752	8.93401	0.0249737	99.9018	28.1943	0.078209	0.112213	4.4379e-15	3.28359e-06	42.6354	0.111822	0.276238	42.6358	0.999979	9.75e-05
2366-24A	SRM04	Pagosa Peak Dacite (South)	0.0017377	4.9978e-06	sanidine	12	1171.49	0.270185	130.858	0.223814	1.5757	0.116822	0.268097	0.12562	0.0103448	0.0013782	0.0321563	8.92204	0.0157461	99.7506	28.1568	0.0493123	0.0942857	6.97861e-15	8.34597e-06	14.3672	0.111802	0.172615	14.368	0.999928	0.0002146
2366-25A	SRM04	Pagosa Peak Dacite (South)	0.0017377	4.9978e-06	sanidine	12	1172.75	0.252389	130.845	0.223814	1.77051	0.116494	0.171985	0.130326	0.0119394	0.0011231	0.0206382	8.92844	0.0156363	99.7061	28.1768	0.048968	0.0941545	6.97792e-15	9.8371e-06	10.0358	0.111672	0.172432	10.037	0.999853	0.0002678
2366-26A	SRM04	Pagosa Peak Dacite (South)	0.0017377	4.9978e-06	sanidine	12	1011.75	0.246982	112.779	0.222809	1.6291	0.117157	0.265458	0.12562	0.0131348	0.0015404	0.0369716	8.92992	0.0182698	99.6305	28.1815	0.0572151	0.098706	6.01445e-15	1.24e-05	12.4999	0.111569	0.199102	12.5013	0.999873	0.0002396
2366-27A	SRM04	Pagosa Peak Dacite (South)	0.0017377	4.9978e-06	sanidine	12	717.706	0.241868	79.5987	0.223495	0.900893	0.116822	0.055927	0.12452	0.0301518	0.0011927	0.0110443	8.89576	0.0255921	98.7496	28.0745	0.0801509	0.113335	4.24496e-15	4.19e-05	4.06889	0.111007	0.282842	4.07809	0.997593	0.0009874
2366-28A	SRM04	Pagosa Peak Dacite (South)	0.0017377	4.9978e-06	sanidine	12	470.557	0.237065	52.3924	0.217954	0.829399	0.117499	0.117916	0.12452	0.0024653	0.0012121	0.0353908	8.96097	0.0382309	99.862	28.2787	0.11972	0.144384	2.79406e-15	4.61642e-06	57.1632	0.111441	0.419121	57.1642	0.999973	0.000106
2366-29A	SRM04	Pagosa Peak Dacite (South)	0.0017377	4.9978e-06	sanidine	12	1359.49	0.270185	151.457	0.228564	1.92166	0.115557	-0.170714	0.125056	0.0094612	0.0014581	-0.0177308	8.94852	0.0139495	99.7843	28.2397	0.043684	0.0916743	8.07712e-15	7.21909e-06	15.1118	0.111509	0.152239	15.1124	0.999949	0.0001718
2366-30A	SRM04	Pagosa Peak Dacite (South)	0.0017377	4.9978e-06	sanidine	12	1607.73	0.270185	179.855	0.219644	2.21068	0.114969	0.168759	0.125056	0.0083968	0.0011033	0.0147711	8.9176	0.0111748	99.8506	28.1429	0.0349966	0.0876157	9.59159e-15	4.99632e-06	14.1433	0.11197	0.123296	14.1436	0.999962	0.000162
2366-31A	SRM04	Pagosa Peak Dacite (South)	0.0017377	4.9978e-06	sanidine	12	880.226	0.252389	97.9348	0.218557	1.20368	0.116174	0.0434118	0.125056	0.022736	0.0014588	0.0069808	8.91073	0.0205718	99.2317	28.1214	0.0644263	0.102921	5.22282e-15	2.57e-05	6.55271	0.111362	0.22504	6.55622	0.999411	0.0005578
2367-01A	SRM05	Pagosa Peak Dacite (North)	0.0017377	4.9978e-06	sanidine	11.9429	1765.51	0.270185	196.935	0.224455	2.47394	0.115862	0.0270835	0.134443	0.0245838	0.0012496	0.0021666	8.91962	0.0104626	99.5852	28.1492	0.0327662	0.0867655	1.05025e-14	1.39e-05	5.23401	0.111647	0.115017	5.23508	0.999759	0.0003892
2367-02A	SRM05	Pagosa Peak Dacite (North)	0.0017377	4.9978e-06	sanidine	12	1722.88	0.276586	190.783	0.233857	2.65046	0.116495	0.118307	0.124784	0.0504374	0.0013821	0.0097767	8.944	0.0112965	99.1312	28.2256	0.0353762	0.0879824	1.01744e-14	2.91e-05	2.8099	0.110835	0.123647	2.8124	0.999033	0.0007422
2367-03A	SRM05	Pagosa Peak Dacite (North)	0.0017377	4.9978e-06	sanidine	12	1507.06	0.270185	167.669	0.224139	2.10103	0.116822	0.200144	0.125056	0.0303742	0.0012873	0.0188267	8.9269	0.0122869	99.4067	28.172	0.0384789	0.0891383	8.94171e-15	1.99e-05	4.39468	0.111356	0.134901	4.39653	0.999529	0.0005424
2367-04A	SRM05	Pagosa Peak Dacite (North)	0.0017377	4.9978e-06	sanidine	12	1084.6	0.252389	119.566	0.22373	1.44756	0.116174	0.213442	0.124262	0.0407072	0.0017992	0.0281653	8.96251	0.0175188	98.8916	28.2835	0.0548602	0.0975989	6.37642e-15	3.71e-05	4.5198	0.110339	0.188594	4.52346	0.999131	0.0006356
2367-05A	SRM05	Pagosa Peak Dacite (North)	0.0017377	4.9978e-06	sanidine	12	1668.91	0.276586	185.787	0.233804	2.37501	0.116494	0.0875081	0.125056	0.0161949	0.0012056	0.007436	8.94904	0.0115522	99.7138	28.2413	0.0361767	0.088348	9.90797e-15	9.57927e-06	7.73058	0.111424	0.126954	7.73143	0.999865	0.00028
2367-06A	SRM05	Pagosa Peak Dacite (North)	0.0017377	4.9978e-06	sanidine	12	2302.49	0.29	256.875	0.229809	3.25869	0.116822	0.126911	0.125913	0.0072669	0.0015402	0.0078028	8.9472	0.0083108	99.9094	28.2356	0.026026	0.0846838	1.36991e-14	3.02658e-06	22.45	0.111666	0.0903617	22.4501	0.999992	7.82e-05
2367-07A	SRM05	Pagosa Peak Dacite (North)	0.0017377	4.9978e-06	sanidine	12	1039.11	0.246982	113.784	0.228274	1.5934	0.115259	0.084966	0.125913	0.0594429	0.0013836	0.0117977	8.96879	0.018514	98.298	28.3032	0.057976	0.0994289	6.06805e-15	5.7e-05	2.38149	0.1096	0.20206	2.38959	0.99642	0.0011747
2367-08A	SRM05	Pagosa Peak Dacite (North)	0.0017377	4.9978e-06	sanidine	12	1433.98	0.25807	159.157	0.221479	1.99778	0.115557	0.196429	0.12452	0.0243643	0.0016252	0.0195134	8.95682	0.0129621	99.5015	28.2657	0.0405913	0.0903073	8.4878e-15	1.67e-05	6.88464	0.11109	0.140342	6.8859	0.999792	0.0003354
2367-09A	SRM05	Pagosa Peak Dacite (North)	0.0017377	4.9978e-06	sanidine	12	1079.74	0.252389	115.526	0.223702	1.40557	0.117157	0.119285	0.124012	0.149726	0.0016516	0.0163313	8.95189	0.0180148	95.866	28.2503	0.0564144	0.0984036	6.16098e-15	0.0001385	1.11977	0.10709	0.195077	1.13598	0.985153	0.0025026
2367-10A	SRM05	Pagosa Peak Dacite (North)	0.0017377	4.9978e-06	sanidine	12	787.225	0.252389	86.6787	0.223529	1.02923	0.116174	0.0938634	0.125334	0.023431	0.001379	0.0171343	8.99391	0.0238879	99.1184	28.3819	0.0748009	0.110255	4.62254e-15	2.95e-05	6.0493	0.110206	0.259914	6.05443	0.999078	0.0006541
2367-11A	SRM05	Pagosa Peak Dacite (North)	0.0017377	4.9978e-06	sanidine	12	1048.52	0.246982	116.002	0.223706	1.37755	0.116174	0.124174	0.125056	0.0261108	0.0012279	0.016974	8.96418	0.0177328	99.2636	28.2888	0.0555301	0.0979892	6.18633e-15	2.47e-05	4.86523	0.110734	0.194315	4.86876	0.999204	0.0005872
2367-12A	SRM05	Pagosa Peak Dacite (North)	0.0017377	4.9978e-06	sanidine	12	1594.85	0.264008	177.049	0.228808	2.28503	0.116494	0.218135	0.126212	0.0208227	0.0011848	0.019544	8.96554	0.0118807	99.6192	28.293	0.0372044	0.0889067	9.44195e-15	1.27e-05	5.98393	0.111113	0.130314	5.98514	0.999763	0.0003516
2367-13A	SRM05	Pagosa Peak Dacite (North)	0.0017377	4.9978e-06	sanidine	12	1560.77	0.276586	173.693	0.2242	2.35554	0.115259	0.165336	0.125056	0.0119136	0.0014582	0.0151054	8.95786	0.0119667	99.7797	28.269	0.0374741	0.0889581	9.26297e-15	7.37307e-06	12.8927	0.111388	0.130313	12.8932	0.999949	0.000187
2367-14A	SRM05	Pagosa Peak Dacite (North)	0.0017377	4.9978e-06	sanidine	12	1134.83	0.25807	126.441	0.228363	1.65211	0.116822	0.083206	0.125056	0.0043379	0.001378	0.0104504	8.95722	0.0166565	99.891	28.267	0.0521602	0.0960678	6.74307e-15	3.64392e-06	33.9738	0.11152	0.182066	33.974	0.999986	8.37e-05
2367-15A	SRM05	Pagosa Peak Dacite (North)	0.0017377	4.9978e-06	sanidine	12	1045.68	0.246982	115.948	0.210283	1.50263	0.118938	0.13708	0.125334	0.0077931	0.001458	0.0187819	8.99112	0.0168996	99.7863	28.3731	0.0529185	0.0967331	6.18347e-15	7.15213e-06	19.8381	0.110983	0.182925	19.8388	0.999958	0.0001538
2367-16A	SRM05	Pagosa Peak Dacite (North)	0.0017377	4.9978e-06	sanidine	12	1161.63	0.252389	121.421	0.228327	1.53932	0.116494	0.449273	0.131102	0.238688	0.0020304	0.0588042	8.97445	0.0177515	93.8893	28.3209	0.0555878	0.0980969	6.47535e-15	0.0002047	0.862835	0.104618	0.189332	0.88268	0.976738	0.0028912
2367-17A	SRM05	Pagosa Peak Dacite (North)	0.0017377	4.9978e-06	sanidine	12	780.747	0.237065	86.8998	0.228118	1.15835	0.116822	0.0861393	0.125056	0.004876	0.0010186	0.0157651	8.96026	0.023971	99.8213	28.2765	0.0750654	0.110216	4.63434e-15	5.9804e-06	22.5888	0.111404	0.264304	22.5899	0.999932	0.0001545
2367-18A	SRM05	Pagosa Peak Dacite (North)	0.0017377	4.9978e-06	sanidine	12	1745.39	0.270185	194.646	0.222275	2.60876	0.116174	0.311509	0.125056	0.015345	0.0011705	0.0254626	8.93651	0.0104843	99.7497	28.2021	0.032833	0.0869294	1.03804e-14	8.37739e-06	8.22131	0.11162	0.11526	8.22195	0.999902	0.000253
2367-19A	SRM05	Pagosa Peak Dacite (North)	0.0017377	4.9978e-06	sanidine	12	900.564	0.246982	100.339	0.228191	1.32228	0.117499	-0.0912235	0.124262	0.0064984	0.0010535	-0.0144703	8.94711	0.0207661	99.7784	28.2353	0.0650309	0.103551	5.35104e-15	7.41439e-06	16.2957	0.11152	0.229107	16.2969	0.999901	0.0002016
2367-20A	SRM05	Pagosa Peak Dacite (North)	0.0017377	4.9978e-06	sanidine	12	815.939	0.252389	90.563	0.228137	1.2439	0.115259	0.148324	0.124784	0.0094056	0.0010843	0.0260869	8.97165	0.0230844	99.6685	28.3121	0.0722877	0.108418	4.8297e-15	1.11e-05	12.3491	0.111093	0.253848	12.3513	0.999789	0.0003054
2367-21A	SRM05	Pagosa Peak Dacite (North)	0.0017377	4.9978e-06	sanidine	11.9455	1817.12	0.270185	199.392	0.224483	2.57395	0.115557	0.411141	0.124262	0.104281	0.0022579	0.0328557	8.95047	0.010743	98.3013	28.2458	0.0336425	0.0873526	1.06335e-14	5.69e-05	2.20032	0.109828	0.113582	2.20308	0.998671	0.0008851
2367-22A	SRM05	Pagosa Peak Dacite (North)	0.0017377	4.9978e-06	sanidine	12	1322.2	0.270185	148.039	0.228535	1.89068	0.116174	0.313171	0.13231	0.0060407	0.0011097	0.0337206	8.91262	0.0140893	99.8792	28.1273	0.0441245	0.0916058	7.89488e-15	4.04072e-06	21.4676	0.112065	0.155751	21.4679	0.999974	0.000125
2367-23A	SRM05	Pagosa Peak Dacite (North)	0.0017377	4.9978e-06	sanidine	12	720.222	0.246982	79.9156	0.222188	0.879749	0.117157	0.0076264	0.133572	0.006004	0.0010535	0.0015221	8.98161	0.0255082	99.7507	28.3433	0.0798763	0.113682	4.26188e-15	8.34353e-06	18.1958	0.111061	0.280184	18.1975	0.999881	0.0002308
2367-24A	SRM05	Pagosa Peak Dacite (North)	0.0017377	4.9978e-06	sanidine	12	809.71	0.252389	90.6391	0.22355	1.19513	0.116174	-0.0742108	0.132725	0.0061102	0.0010656	-0.0130637	8.90452	0.0224513	99.7692	28.1019	0.0703132	0.106663	4.83376e-15	7.7239e-06	17.6624	0.112043	0.248642	17.6637	0.999901	0.0002214
2367-25A	SRM05	Pagosa Peak Dacite (North)	0.0017377	4.9978e-06	sanidine	12	1935.29	0.270185	209.886	0.22461	2.66973	0.116174	0.205326	0.125056	0.201455	0.0019273	0.0156148	8.92659	0.0100507	96.8986	28.171	0.0314757	0.086344	1.11932e-14	0.0001039	0.968654	0.10855	0.107941	0.974364	0.993847	0.0018651
2367-26A	SRM05	Pagosa Peak Dacite (North)	0.0017377	4.9978e-06	sanidine	12	474.524	0.237065	52.1977	0.209946	0.808846	0.116822	-0.150377	0.125334	0.0131557	0.0010479	-0.046018	9.00557	0.0370454	99.1536	28.4184	0.115999	0.14154	2.78369e-15	2.83e-05	8.05617	0.110103	0.405366	8.06547	0.998737	0.0007647
2367-27A	SRM05	Pagosa Peak Dacite (North)	0.0017377	4.9978e-06	sanidine	12	2002.66	0.283196	223.167	0.224343	2.8077	0.116822	0.221459	0.125334	0.0069085	0.0011228	0.0158572	8.9571	0.0092474	99.9043	28.2666	0.0289584	0.0857131	1.19014e-14	3.20024e-06	18.0389	0.111536	0.101535	18.0391	0.999984	0.0001092
2367-28A	SRM05	Pagosa Peak Dacite (North)	0.0017377	4.9978e-06	sanidine	12	1058.38	0.252389	117.249	0.223714	1.2854	0.117157	0.0960145	0.125334	0.0191418	0.0015407	0.0130904	8.97026	0.0177211	99.4647	28.3078	0.0554929	0.0980125	6.25289e-15	1.79e-05	8.2528	0.110883	0.192321	8.25479	0.999729	0.0003585
2367-29A	SRM05	Pagosa Peak Dacite (North)	0.0017377	4.9978e-06	sanidine	12	1023.27	0.246982	113.597	0.22069	1.58947	0.115259	-0.0005866	0.125056	0.018559	0.0011368	-8.27e-05	8.95095	0.0178091	99.4594	28.2473	0.0557703	0.098029	6.05814e-15	1.81e-05	6.31576	0.111116	0.195801	6.31845	0.99952	0.0004714
2367-30A	SRM05	Pagosa Peak Dacite (North)	0.0017377	4.9978e-06	sanidine	12	921.271	0.241868	102.904	0.221884	1.2379	0.116822	0.149008	0.124262	0.0083859	0.001078	0.0232064	8.92123	0.0196628	99.7384	28.1543	0.0615785	0.101236	5.48784e-15	8.75488e-06	13.7905	0.111799	0.217256	13.7919	0.999876	0.0002302
2367-31A	SRM05	Pagosa Peak Dacite (North)	0.0017377	4.9978e-06	sanidine	12	892.361	0.252389	95.684	0.22227	1.1135	0.116494	0.13356	0.125334	0.116573	0.001558	0.0223783	8.95509	0.0215582	96.1082	28.2603	0.0675103	0.10518	5.10282e-15	0.0001303	1.36077	0.107322	0.234053	1.37994	0.985519	0.002513
2368-01A	SRM06	Pagosa Peak Dacite (North)	0.0017377	4.9978e-06	sanidine	12	1045.16	0.252389	116.744	0.222836	1.62143	0.116174	0.0853571	0.136251	0.0035059	0.0010357	0.0117306	8.93606	0.0174305	99.9062	28.2007	0.0545861	0.0972508	6.22593e-15	3.13584e-06	32.9022	0.111801	0.192432	32.9024	0.999983	9.22e-05
2368-02A	SRM06	Pagosa Peak Dacite (North)	0.0017377	4.9978e-06	sanidine	12	938.508	0.241868	104.567	0.223631	1.18627	0.118568	0.0356877	0.125913	0.0089429	0.0010906	0.0054777	8.94159	0.0195449	99.7171	28.218	0.0612071	0.101155	5.57656e-15	9.46824e-06	12.6657	0.11152	0.215448	12.6672	0.999855	0.0002435
2368-03A	SRM06	Pagosa Peak Dacite (North)	0.0017377	4.9978e-06	sanidine	12	1305.55	0.252389	144.827	0.228507	1.82431	0.116494	0.163186	0.124784	0.0141406	0.0011298	0.0180914	8.97795	0.0144902	99.6848	28.3319	0.0453747	0.0927194	7.72359e-15	1.06e-05	8.44311	0.111033	0.158988	8.44435	0.999823	0.0002786
2368-04A	SRM06	Pagosa Peak Dacite (North)	0.0017377	4.9978e-06	sanidine	12	1081.44	0.252389	119.808	0.228315	1.46517	0.117157	0.0118307	0.125056	0.0159735	0.0011845	0.0015867	8.97841	0.0175203	99.5594	28.3333	0.0548632	0.0977172	6.38935e-15	1.47e-05	7.62558	0.110888	0.192025	7.62768	0.999683	0.0003722
2368-05A	SRM06	Pagosa Peak Dacite (North)	0.0017377	4.9978e-06	sanidine	12	1639.89	0.270185	182.166	0.223851	2.51052	0.116822	0.374183	0.124784	0.0190812	0.0011708	0.0330172	8.96423	0.011309	99.6684	28.2889	0.035414	0.0881618	9.7149e-15	1.11e-05	6.60833	0.111185	0.124006	6.60929	0.999824	0.0003314
2368-06A	SRM06	Pagosa Peak Dacite (North)	0.0017377	4.9978e-06	sanidine	12	2740.8	0.296985	304.886	0.230586	3.81176	0.117848	0.393053	0.12562	0.0228353	0.0017979	0.02073	8.95992	0.0071026	99.7606	28.2754	0.0222419	0.0837071	1.62596e-14	8.01154e-06	8.28595	0.111341	0.0764164	8.28622	0.999958	0.0001855
2368-07A	SRM06	Pagosa Peak Dacite (North)	0.0017377	4.9978e-06	sanidine	12	262.398	0.232166	29.09	0.221593	0.526119	0.115862	0.215886	0.12452	0.0011448	0.0009758	0.119423	9.00584	0.0698755	99.9277	28.4192	0.218799	0.233347	1.55137e-15	2.41602e-06	159.937	0.110959	0.76704	159.937	0.999988	6.38e-05
2368-08A	SRM06	Pagosa Peak Dacite (North)	0.0017377	4.9978e-06	sanidine	12	753.201	0.246982	83.8121	0.223515	0.865588	0.115862	0.128965	0.124784	0.0075032	0.0010188	0.0247706	8.95278	0.0243656	99.7122	28.2531	0.0763023	0.111014	4.4697e-15	9.6327e-06	14.5482	0.111376	0.268743	14.5502	0.99983	0.0002752
2368-09A	SRM06	Pagosa Peak Dacite (North)	0.0017377	4.9978e-06	sanidine	12	998.42	0.246982	110.254	0.223667	1.27547	0.117848	0.147835	0.125056	0.0322746	0.0012286	0.0215932	8.96091	0.0186476	99.0438	28.2785	0.058395	0.0996172	5.87983e-15	3.2e-05	3.93948	0.110529	0.204405	3.94437	0.998657	0.0007603
2368-10A	SRM06	Pagosa Peak Dacite (North)	0.0017377	4.9978e-06	sanidine	12	1365.26	0.270185	152.293	0.228572	1.81841	0.116822	0.372716	0.124784	0.0097491	0.0014581	0.0394416	8.93906	0.0138606	99.8043	28.2101	0.0434062	0.0914684	8.12179e-15	6.54821e-06	16.6021	0.11165	0.151414	16.6026	0.999958	0.0001559
2368-11A	SRM06	Pagosa Peak Dacite (North)	0.0017377	4.9978e-06	sanidine	12	1312.8	0.264008	146.562	0.228522	1.90671	0.117499	0.324318	0.125913	0.0136015	0.0010972	0.0356754	8.92302	0.0142357	99.7072	28.1599	0.0445822	0.0919079	7.81615e-15	9.79985e-06	8.80039	0.111741	0.157243	8.80154	0.99984	0.0002924
2368-12A	SRM06	Pagosa Peak Dacite (North)	0.0017377	4.9978e-06	sanidine	12	815.564	0.252389	91.1093	0.22814	1.0603	0.116494	0.16651	0.125334	0.0023085	0.0012557	0.0294753	8.93695	0.0229559	99.9283	28.2035	0.0718895	0.107923	4.85886e-15	2.39536e-06	65.8388	0.111815	0.252354	65.839	0.999993	5.77e-05
2368-13A	SRM06	Pagosa Peak Dacite (North)	0.0017377	4.9978e-06	sanidine	12	1173.54	0.246982	130.734	0.222939	1.73983	0.115259	0.0831083	0.123533	0.0057597	0.0010535	0.0102588	8.95567	0.0156054	99.8587	28.2621	0.048869	0.0943096	6.97206e-15	4.72656e-06	19.6253	0.111503	0.171852	19.6258	0.999962	0.0001314
2368-14A	SRM06	Pagosa Peak Dacite (North)	0.0017377	4.9978e-06	sanidine	12	1115.86	0.25807	124.231	0.228347	1.57079	0.115862	0.114494	0.12452	0.0065669	0.001078	0.0148784	8.95879	0.0168287	99.8311	28.2719	0.0526993	0.0963732	6.62525e-15	5.64973e-06	17.652	0.111434	0.18529	17.6527	0.999945	0.0001636
2368-15A	SRM06	Pagosa Peak Dacite (North)	0.0017377	4.9978e-06	sanidine	12	862.79	0.252389	95.9078	0.228166	1.21106	0.116494	0.164945	0.124784	0.0154145	0.0010974	0.027775	8.94106	0.0217371	99.4792	28.2163	0.0680723	0.105447	5.11477e-15	1.74e-05	7.52272	0.111261	0.239737	7.5261	0.999493	0.0004747
2368-16A	SRM06	Pagosa Peak Dacite (North)	0.0017377	4.9978e-06	sanidine	12	1849.21	0.276586	205.868	0.234027	2.60375	0.115259	0.19506	0.125334	0.006275	0.0011361	0.0153112	8.96589	0.010441	99.9057	28.2941	0.0326958	0.0871192	1.09789e-14	3.15082e-06	20.0755	0.111429	0.114679	20.0756	0.999984	9.72e-05
2368-17A	SRM06	Pagosa Peak Dacite (North)	0.0017377	4.9978e-06	sanidine	12	1378.03	0.264008	153.04	0.224	1.84112	0.116494	0.214321	0.12452	0.0312649	0.0017984	0.0226388	8.93617	0.0136802	99.3324	28.201	0.0428413	0.091179	8.16161e-15	2.24e-05	5.90779	0.111158	0.147643	5.90945	0.999688	0.000421
2368-18A	SRM06	Pagosa Peak Dacite (North)	0.0017377	4.9978e-06	sanidine	12	1233.49	0.25807	137.568	0.228448	1.70728	0.118204	0.219797	0.124784	0.0045385	0.0010968	0.025838	8.94948	0.0151973	99.9018	28.2427	0.0475913	0.0936065	7.3365e-15	3.28191e-06	27.9471	0.111629	0.167406	27.9474	0.999982	9.36e-05
2368-19A	SRM06	Pagosa Peak Dacite (North)	0.0017377	4.9978e-06	sanidine	12	1164.96	0.25807	129.956	0.228389	1.72006	0.116822	0.293225	0.131901	0.0041393	0.001378	0.0365678	8.94812	0.0161951	99.9111	28.2385	0.0507163	0.0952232	6.93058e-15	2.97232e-06	40.6927	0.111656	0.177167	40.6928	0.999991	6.81e-05
2368-20A	SRM06	Pagosa Peak Dacite (North)	0.0017377	4.9978e-06	sanidine	12	1338.01	0.252389	149.286	0.222233	1.99591	0.116174	-0.0286479	0.12562	0.0092894	0.0010906	-0.0031112	8.93583	0.0136157	99.7919	28.2	0.0426394	0.0910817	7.96143e-15	6.96355e-06	12.0852	0.111676	0.150081	12.0859	0.999923	0.0001963
2368-21A	SRM06	Pagosa Peak Dacite (North)	0.0017377	4.9978e-06	sanidine	12	2840.58	0.296985	316.016	0.23565	3.89043	0.116175	0.307403	0.124784	0.029289	0.0013795	0.0157767	8.9535	0.0069016	99.6991	28.2553	0.0216128	0.0834872	1.68532e-14	1.01e-05	4.91962	0.111352	0.0753118	4.92009	0.999883	0.0002952
2368-22A	SRM06	Pagosa Peak Dacite (North)	0.0017377	4.9978e-06	sanidine	12	942.61	0.252389	104.72	0.223632	1.24734	0.117157	0.0188705	0.124262	0.0086152	0.0010906	0.0029248	8.9685	0.0195847	99.728	28.3023	0.061329	0.101419	5.58473e-15	9.10448e-06	13.1126	0.111198	0.215262	13.114	0.999865	0.0002541
2368-23A	SRM06	Pagosa Peak Dacite (North)	0.0017377	4.9978e-06	sanidine	12	1227.49	0.25807	136.872	0.233356	1.6762	0.117848	0.271911	0.12452	0.0103945	0.0015403	0.0322564	8.93869	0.0157482	99.7616	28.2089	0.0493174	0.0944142	7.29938e-15	7.97795e-06	15.9849	0.111606	0.171816	15.9856	0.999942	0.000161
2368-24A	SRM06	Pagosa Peak Dacite (North)	0.0017377	4.9978e-06	sanidine	12	623.541	0.241868	69.396	0.221712	0.829498	0.116494	0.104716	0.125334	0.0066811	0.0010417	0.0245102	8.94931	0.0291923	99.6908	28.2422	0.0914178	0.121878	3.7009e-15	1.04e-05	16.7121	0.111395	0.321893	16.7147	0.999815	0.0002798
2368-25A	SRM06	Pagosa Peak Dacite (North)	0.0017377	4.9978e-06	sanidine	12	808.611	0.252389	89.4874	0.223544	1.19011	0.115259	0.0686376	0.130711	0.012698	0.0014582	0.0124678	8.98599	0.0231779	99.5373	28.3571	0.0725786	0.108707	4.77237e-15	1.55e-05	11.8726	0.110769	0.251792	11.8749	0.999775	0.0003261
2368-26A	SRM06	Pagosa Peak Dacite (North)	0.0017377	4.9978e-06	sanidine	12	983.663	0.246982	109.466	0.223662	1.21096	0.118568	0.192713	0.133146	0.007387	0.0010969	0.0286276	8.9588	0.0187192	99.7877	28.2719	0.0586195	0.0997339	5.83782e-15	7.10404e-06	16.264	0.111385	0.205897	16.265	0.99992	0.0001884
2368-27A	SRM06	Pagosa Peak Dacite (North)	0.0017377	4.9978e-06	sanidine	12	1037.99	0.246982	114.697	0.22828	1.59793	0.116174	-0.0070398	0.130711	0.0161045	0.0010974	-0.0009984	8.99967	0.0182985	99.5373	28.3999	0.057298	0.0992586	6.11679e-15	1.55e-05	7.06218	0.110601	0.200482	7.06466	0.999597	0.0004001
2368-28A	SRM06	Pagosa Peak Dacite (North)	0.0017377	4.9978e-06	sanidine	12	1205.44	0.25807	134.025	0.222104	1.54777	0.116174	0.121827	0.125334	0.0097888	0.0014581	0.0147977	8.96463	0.0153586	99.7635	28.2902	0.0480952	0.0939792	7.14758e-15	7.91359e-06	15.5669	0.111286	0.167126	15.5676	0.999942	0.0001763
2368-29A	SRM06	Pagosa Peak Dacite (North)	0.0017377	4.9978e-06	sanidine	12	478.988	0.237065	53.222	0.219562	0.759873	0.116174	0.0833038	0.124262	0.0045236	0.0010186	0.0254903	8.96741	0.0377483	99.7308	28.2989	0.118208	0.143164	2.83834e-15	9.00955e-06	24.4686	0.111215	0.415575	24.4714	0.999856	0.000241
2368-30A	SRM06	Pagosa Peak Dacite (North)	0.0017377	4.9978e-06	sanidine	12	737.556	0.246982	82.167	0.223507	1.019	0.115862	0.126031	0.125334	0.0046239	0.0010358	0.0249886	8.95233	0.0248612	99.8241	28.2517	0.0778541	0.112083	4.38198e-15	5.8858e-06	24.72	0.111506	0.274119	24.7211	0.999938	0.0001656
2368-31A	SRM06	Pagosa Peak Dacite (North)	0.0017377	4.9978e-06	sanidine	12	926.752	0.241868	103.568	0.233129	1.34637	0.115557	0.0164261	0.131102	0.0081833	0.0010596	0.0025859	8.91657	0.0204701	99.7379	28.1396	0.0641073	0.102762	5.5233e-15	8.77337e-06	13.5237	0.111857	0.226645	13.5252	0.99986	0.0002223
2369-01A	FCs-C9	Fish Canyon Tuff	0.0017377	4.9978e-06	sanidine	12	1535.57	0.270185	171.815	0.228755	2.1682	0.117499	0.183132	0.125913	0.0098444	0.0011296	0.0173848	8.91275	0.0121597	99.8166	28.1277	0.0380814	0.088854	9.16293e-15	6.1368e-06	12.3557	0.111993	0.134322	12.3562	0.999941	0.0001866
2369-02A	FCs-C9	Fish Canyon Tuff	0.0017377	4.9978e-06	sanidine	12	470.139	0.237065	52.2941	0.217173	0.643045	0.116174	0.179416	0.125056	0.0017832	0.0009861	0.0559806	8.97428	0.0380175	99.912	28.3204	0.119049	0.143894	2.78886e-15	2.94162e-06	74.129	0.111331	0.418424	74.1295	0.999984	8.2e-05
2369-03A	FCs-C9	Fish Canyon Tuff	0.0017377	4.9978e-06	sanidine	12	1145.92	0.25807	127.634	0.222054	1.68486	0.116174	0.0210215	0.125056	0.0081208	0.0013781	0.0026894	8.9511	0.0160617	99.7901	28.2478	0.0502981	0.0950235	6.80674e-15	7.02331e-06	17.4762	0.111484	0.17546	17.4768	0.99995	0.0001655
2369-04A	FCs-C9	Fish Canyon Tuff	0.0017377	4.9978e-06	sanidine	12	773.855	0.241868	86.5293	0.228116	1.04073	0.116822	0.0361765	0.124784	0.0061082	0.0010595	0.0068293	8.91422	0.0239827	99.7671	28.1323	0.0751082	0.109946	4.61463e-15	7.79505e-06	18.1686	0.111919	0.265522	18.1701	0.999893	0.0002026
2369-05A	FCs-C9	Fish Canyon Tuff	0.0017377	4.9978e-06	sanidine	12	623.033	0.241868	69.9223	0.217239	0.703327	0.117156	0.0084086	0.12452	0.0021734	0.0009966	0.0019651	8.89278	0.0282101	99.895	28.0652	0.0883504	0.119257	3.72897e-15	3.51146e-06	47.315	0.112333	0.313158	47.3155	0.999978	0.0001018
2369-06A	FCs-C9	Fish Canyon Tuff	0.0017377	4.9978e-06	sanidine	12	124.48	0.225807	13.9884	0.207865	0.108764	0.116174	-0.123782	0.126832	0.0002224	0.0009562	-0.144708	8.87913	0.134668	99.8769	28.0224	0.421773	0.429289	7.46006e-16	4.1151e-06	194.78	0.112485	1.4972	194.783	0.99997	0.0001129
2369-07A	FCs-C9	Fish Canyon Tuff	0.0017377	4.9978e-06	sanidine	12	1085.13	0.252389	121.209	0.222435	1.29858	0.115862	0.200829	0.125056	0.0052196	0.0012931	0.0271054	8.93257	0.0168599	99.8674	28.1898	0.0527995	0.0962335	6.46408e-15	4.43407e-06	27.506	0.111801	0.185017	27.5064	0.999977	0.0001064
2369-08A	FCs-C9	Fish Canyon Tuff	0.0017377	4.9978e-06	sanidine	12	1141.02	0.25807	127.285	0.223787	1.40567	0.117848	-0.0148617	0.12562	0.007945	0.0010906	-0.0019108	8.93723	0.0160796	99.7902	28.2044	0.0503553	0.0949495	6.78815e-15	7.02188e-06	14.0613	0.111657	0.177295	14.0621	0.99992	0.0002053
2369-09A	FCs-C9	Fish Canyon Tuff	0.0017377	4.9978e-06	sanidine	12	753.673	0.241868	83.7432	0.223515	1.06522	0.116494	0.0572958	0.12452	0.0103617	0.0011164	0.0112212	8.9551	0.0244393	99.5947	28.2603	0.0765326	0.111187	4.46605e-15	1.36e-05	11.2573	0.111216	0.268875	11.26	0.999715	0.0003404
2369-10A	FCs-C9	Fish Canyon Tuff	0.0017377	4.9978e-06	sanidine	12	44.3877	0.224722	5.2007	0.20841	0.246833	0.116174	0.0499627	0.124784	0.0009154	0.0009469	0.157621	8.48367	0.347527	99.486	26.7834	1.08917	1.09185	2.77355e-16	1.72e-05	129.317	0.117268	4.04018	129.372	0.999512	0.0004909
2369-11A	FCs-C9	Fish Canyon Tuff	0.0017377	4.9978e-06	sanidine	12	1950.58	0.296985	217.575	0.229271	2.78125	0.116174	0.165141	0.134886	0.0092447	0.0011911	0.0124576	8.94466	0.0096949	99.8644	28.2276	0.0303606	0.0860937	1.16034e-14	4.53687e-06	13.8915	0.111647	0.106489	13.8917	0.999971	0.0001568
2369-12A	FCs-C9	Fish Canyon Tuff	0.0017377	4.9978e-06	sanidine	12	328.091	0.237065	36.5449	0.207633	0.542738	0.116494	0.0985566	0.125334	-0.000417	0.0011838	0.0442967	8.97495	0.0523798	100.06	28.3225	0.164024	0.182859	1.94895e-15	-2.00886e-06	-184.674	0.111488	0.572845	-184.676	0.999995	4.94e-05
2369-13A	FCs-C9	Fish Canyon Tuff	0.0017377	4.9978e-06	sanidine	12	372.187	0.237065	41.3066	0.210216	0.395917	0.117848	-0.115863	0.134443	0.0022429	0.0009809	-0.0460894	8.9836	0.0466938	99.7971	28.3496	0.146216	0.167109	2.2029e-15	6.78924e-06	40.6338	0.111088	0.512969	40.6361	0.99992	0.0001947
2369-14A	FCs-C9	Fish Canyon Tuff	0.0017377	4.9978e-06	sanidine	12	205.565	0.237065	21.8912	0.222445	0.0750334	0.117499	0.0647267	0.12562	0.0435855	0.0011875	0.0486018	8.78922	0.0915298	93.6832	27.7408	0.286711	0.297444	1.16747e-15	0.0002116	2.8099	0.106589	1.02285	2.98451	0.939507	0.0046298
2369-15A	FCs-C9	Fish Canyon Tuff	0.0017377	4.9978e-06	sanidine	12	1107.94	0.220227	123.909	0.188863	1.74367	0.106414	0.170519	0.104807	0.0079004	0.0012416	0.0236665	8.91527	0.0140582	99.799	28.1356	0.0440268	0.0915794	6.60822e-15	6.72456e-06	16.9948	0.111942	0.153739	16.9953	0.999959	0.0001513
2369-16A	FCs-C9	Fish Canyon Tuff	0.0017377	4.9978e-06	sanidine	12	965.988	0.220227	108.315	0.194147	1.36466	0.105442	0.284328	0.103803	0.004601	0.00086	0.0451607	8.89926	0.016286	99.8785	28.0855	0.0510052	0.0950114	5.77656e-15	4.06304e-06	22.788	0.112232	0.180722	22.7884	0.999969	0.0001263
2369-17A	FCs-C9	Fish Canyon Tuff	0.0017377	4.9978e-06	sanidine	12	813.413	0.214009	90.541	0.188612	1.02883	0.106414	0.241601	0.103175	0.0017852	0.001155	0.0459245	8.97153	0.0192529	99.9545	28.3118	0.0602894	0.100815	4.82866e-15	1.51828e-06	95.5998	0.111413	0.210011	95.5997	0.999998	3.45e-05
2369-18A	FCs-C9	Fish Canyon Tuff	0.0017377	4.9978e-06	sanidine	12	1172.97	0.226716	131.113	0.188927	1.76697	0.107103	0.189291	0.103175	0.0028923	0.0010792	0.0248657	8.9324	0.0132479	99.9384	28.1893	0.041488	0.0905214	6.99241e-15	2.05535e-06	45.9	0.111883	0.145413	45.9001	0.999995	5.6e-05
2369-19A	FCs-C9	Fish Canyon Tuff	0.0017377	4.9978e-06	sanidine	12	866.01	0.220227	96.9277	0.188654	1.25462	0.107102	0.244534	0.104129	0.0038017	0.0008672	0.0434679	8.91642	0.0177389	99.8891	28.1392	0.0555538	0.097654	5.16928e-15	3.70845e-06	28.0754	0.112028	0.196325	28.0758	0.999976	0.0001174
2369-20A	FCs-C9	Fish Canyon Tuff	0.0017377	4.9978e-06	sanidine	12	1036.38	0.220227	115.602	0.194203	1.4454	0.107102	0.243361	0.103175	0.0040242	0.0011551	0.0362849	8.94789	0.0154735	99.9006	28.2377	0.0484566	0.0940373	6.16517e-15	3.3239e-06	34.2766	0.111647	0.169364	34.2768	0.999988	7.78e-05
2369-21A	FCs-C9	Fish Canyon Tuff	0.0017377	4.9978e-06	sanidine	12	475.987	0.214009	53.2255	0.16918	0.638817	0.107822	0.12828	0.104129	0.0042952	0.0008316	0.041572	8.91213	0.029041	99.7491	28.1258	0.0909499	0.121309	2.83858e-15	8.39626e-06	21.7057	0.111925	0.321081	21.7075	0.999891	0.0002902
2369-22A	FCs-C9	Fish Canyon Tuff	0.0017377	4.9978e-06	sanidine	12	1125.21	0.233452	126.116	0.188882	1.61632	0.106754	0.180589	0.103485	0.0045534	0.0011296	0.0247085	8.90395	0.0137571	99.8907	28.1001	0.0430847	0.0910418	6.72591e-15	3.65435e-06	28.1148	0.112187	0.151227	28.115	0.999985	0.0001013
2369-23A	FCs-C9	Fish Canyon Tuff	0.0017377	4.9978e-06	sanidine	12	1251.13	0.226716	140.034	0.194415	1.88242	0.106414	0.257244	0.104129	0.0035337	0.0011127	0.0317102	8.91998	0.0127429	99.9308	28.1503	0.0399074	0.0897092	7.4682e-15	2.30974e-06	39.4448	0.11203	0.140038	39.4449	0.999994	5.95e-05
2369-24A	FCs-C9	Fish Canyon Tuff	0.0017377	4.9978e-06	sanidine	12	749.517	0.220227	83.5925	0.173555	1.04349	0.107822	0.327935	0.114722	0.002094	0.0007841	0.0677595	8.95339	0.019026	99.9474	28.255	0.0595809	0.100263	4.45809e-15	1.75593e-06	63.0608	0.111631	0.209731	63.0607	0.999995	6.53e-05
2369-25A	FCs-C9	Fish Canyon Tuff	0.0017377	4.9978e-06	sanidine	12	818.907	0.214009	91.27	0.188616	1.13769	0.108194	0.0906369	0.103803	0.0072173	0.0008247	0.0171589	8.94106	0.0188544	99.7446	28.2164	0.0590446	0.0998574	4.86755e-15	8.54772e-06	12.2978	0.111558	0.208341	12.2992	0.999857	0.0002667
2369-26A	FCs-C9	Fish Canyon Tuff	0.0017377	4.9978e-06	sanidine	12	301.786	0.208087	33.3982	0.188363	0.335143	0.105134	0.0399897	0.103803	0.0007357	0.0009579	0.0206967	9.02166	0.0520416	99.9347	28.4687	0.162952	0.182083	1.78117e-15	2.17935e-06	150.404	0.110772	0.568294	150.404	0.999993	5.57e-05
2369-27A	FCs-C9	Fish Canyon Tuff	0.0017377	4.9978e-06	sanidine	12	600.34	0.208087	66.8291	0.185409	0.828416	0.107458	-0.0539715	0.103803	0.002371	0.0007973	-0.0139709	8.96353	0.0253552	99.8757	28.2867	0.0793997	0.113233	3.56409e-15	4.15794e-06	33.4372	0.111424	0.279642	33.4379	0.999965	0.0001286
2369-28A	FCs-C9	Fish Canyon Tuff	0.0017377	4.9978e-06	sanidine	12	950.319	0.226716	106.163	0.187168	1.36014	0.107458	0.143728	0.105157	0.0032169	0.001155	0.0234293	8.93511	0.0162582	99.9098	28.1977	0.050915	0.0952316	5.66179e-15	3.01353e-06	41.2713	0.111817	0.177943	41.2714	0.999991	7.75e-05
2369-29A	FCs-C9	Fish Canyon Tuff	0.0017377	4.9978e-06	sanidine	12	956.699	0.226716	106.686	0.188723	1.25305	0.106414	0.0300167	0.104807	0.0113139	0.0008532	0.0048708	8.92745	0.0161453	99.6485	28.1737	0.050562	0.0949859	5.68973e-15	1.18e-05	7.89686	0.11162	0.178507	7.89852	0.999745	0.0003986
2369-30A	FCs-C9	Fish Canyon Tuff	0.0017377	4.9978e-06	sanidine	12	1300.27	0.220227	144.826	0.18906	2.05629	0.107459	0.213539	0.103803	0.0022419	0.001155	0.025545	8.96631	0.0120717	99.9614	28.2954	0.0378024	0.0891648	7.72374e-15	1.28676e-06	70.6042	0.111486	0.131662	70.6042	0.999998	3.09e-05
2370-01A	SRM07	Pagosa Peak Dacite (North)	0.0017377	4.9978e-06	sanidine	12	713.699	0.208087	79.3519	0.193961	0.996381	0.106754	0.0932768	0.104129	0.0040083	0.0008109	0.0203728	8.97145	0.0223315	99.8416	28.3115	0.06993	0.106859	4.23194e-15	5.29954e-06	22.4192	0.111288	0.24621	22.4201	0.99994	0.0001541
2370-02A	SRM07	Pagosa Peak Dacite (North)	0.0017377	4.9978e-06	sanidine	12	1093.15	0.214009	121.719	0.194252	1.7061	0.108194	0.173452	0.106256	0.0027682	0.001155	0.0247068	8.96686	0.0147248	99.9367	28.2972	0.0461104	0.0929963	6.49145e-15	2.11236e-06	51.2128	0.111451	0.160816	51.2129	0.999995	4.66e-05
2370-03A	SRM07	Pagosa Peak Dacite (North)	0.0017377	4.9978e-06	sanidine	12	1508.7	0.226716	164.831	0.200416	2.13093	0.107103	0.157123	0.105157	0.110743	0.0015262	0.0165394	8.94468	0.0113349	97.8157	28.2277	0.0354963	0.0880363	8.79068e-15	7.32e-05	1.40169	0.109356	0.122536	1.40676	0.996201	0.0013155
2370-04A	SRM07	Pagosa Peak Dacite (North)	0.0017377	4.9978e-06	sanidine	12	543.741	0.197231	60.6614	0.172676	0.734108	0.106754	0.0045954	0.103803	0.0010386	0.0007776	0.0013149	8.94999	0.0260132	99.9433	28.2443	0.0814621	0.114604	3.23516e-15	1.89308e-06	79.2778	0.111669	0.287008	79.2778	0.999993	5.79e-05
2370-05A	SRM07	Pagosa Peak Dacite (North)	0.0017377	4.9978e-06	sanidine	12	1039.46	0.220227	116.205	0.188798	1.41098	0.107102	0.161523	0.104129	0.0036677	0.00086	0.0241354	8.92817	0.0148268	99.9054	28.176	0.046433	0.0928592	6.1974e-15	3.16257e-06	27.2318	0.111899	0.163875	27.232	0.999982	0.0001006
2370-06A	SRM07	Pagosa Peak Dacite (North)	0.0017377	4.9978e-06	sanidine	12	426.197	0.208087	47.3246	0.174539	0.634588	0.106754	0.0895614	0.103485	0.0003932	0.0010055	0.032932	8.99636	0.0341204	99.988	28.3895	0.106842	0.134088	2.52389e-15	3.93766e-07	617.081	0.111143	0.3721	617.08	1	1.04e-05
2370-07A	SRM07	Pagosa Peak Dacite (North)	0.0017377	4.9978e-06	sanidine	12	583.2	0.202485	64.6591	0.170218	0.854476	0.107458	-0.0201415	0.114217	0.0054966	0.0010462	-0.0054226	8.98553	0.024396	99.7167	28.3556	0.0763931	0.111287	3.44837e-15	9.48402e-06	19.5503	0.110975	0.26558	19.5517	0.999908	0.0002323
2370-08A	SRM07	Pagosa Peak Dacite (North)	0.0017377	4.9978e-06	sanidine	12	209.995	0.193298	23.0874	0.169413	0.278106	0.107102	0.0614023	0.104807	0.0010336	0.0007283	0.0463146	9.07574	0.0678886	99.8735	28.6381	0.212552	0.227722	1.23129e-15	4.2319e-06	86.6778	0.110044	0.739684	86.6795	0.999964	0.0001322
2370-09A	SRM07	Pagosa Peak Dacite (North)	0.0017377	4.9978e-06	sanidine	12	1575.53	0.240416	175.834	0.1948	2.40166	0.106414	0.182936	0.105882	0.0055244	0.0009119	0.0181312	8.94337	0.0101525	99.9044	28.2236	0.0317937	0.0865989	9.37748e-15	3.19471e-06	18.8044	0.111708	0.111853	18.8046	0.999982	0.0001108
2370-10A	SRM07	Pagosa Peak Dacite (North)	0.0017377	4.9978e-06	sanidine	12	1612.11	0.240416	179.379	0.185901	2.13476	0.106082	0.108921	0.105157	0.0093698	0.0014194	0.010586	8.96354	0.0097101	99.8308	28.2868	0.0304071	0.0862668	9.56654e-15	5.66025e-06	15.8008	0.111374	0.104722	15.801	0.999978	0.0001345
2370-11A	SRM07	Pagosa Peak Dacite (North)	0.0017377	4.9978e-06	sanidine	12	637.732	0.214009	70.7439	0.174251	0.932656	0.107102	0.132387	0.104807	0.0029796	0.0008315	0.032637	8.99505	0.0226776	99.8758	28.3854	0.0710109	0.107727	3.77288e-15	4.15482e-06	32.7838	0.111034	0.248634	32.7843	0.999971	0.0001382
2370-12A	SRM07	Pagosa Peak Dacite (North)	0.0017377	4.9978e-06	sanidine	12	548.379	0.197231	61.0769	0.172309	0.988514	0.105758	0.0918102	0.102873	0.0054172	0.0007908	0.0262357	8.94495	0.0257793	99.7197	28.2285	0.0807304	0.114053	3.25732e-15	9.38262e-06	16.1003	0.111481	0.284454	16.1023	0.999844	0.0002826
2370-13A	SRM07	Pagosa Peak Dacite (North)	0.0017377	4.9978e-06	sanidine	12	1575.43	0.233452	175.499	0.186847	2.33312	0.107459	0.0918102	0.111318	0.0051342	0.0009118	0.0091339	8.96012	0.0097895	99.9074	28.276	0.0306561	0.0863265	9.35962e-15	3.09365e-06	19.4949	0.111502	0.107512	19.495	0.999985	0.0001048
2370-14A	SRM07	Pagosa Peak Dacite (North)	0.0017377	4.9978e-06	sanidine	12	735.142	0.208087	81.893	0.18752	1.06532	0.108194	0.278657	0.111785	0.0033103	0.0010626	0.059433	8.95896	0.0210715	99.8929	28.2724	0.0659857	0.104235	4.36748e-15	3.58011e-06	41.644	0.111501	0.230771	41.6443	0.999985	8.34e-05
2370-15A	SRM07	Pagosa Peak Dacite (North)	0.0017377	4.9978e-06	sanidine	12	207.543	0.190515	23.0159	0.172555	0.457871	0.107102	-0.0684421	0.103803	0.0009234	0.0007283	-0.0519784	8.99506	0.0687037	99.8491	28.3855	0.215134	0.22988	1.22747e-15	5.04614e-06	73.5054	0.111004	0.755438	73.5078	0.999947	0.0001518
2370-16A	SRM07	Pagosa Peak Dacite (North)	0.0017377	4.9978e-06	sanidine	12	962.254	0.226716	107.048	0.188726	1.23594	0.108573	0.160546	0.104129	0.0031862	0.0011211	0.0262247	8.97273	0.0162961	99.9123	28.3155	0.0510302	0.0955752	5.70901e-15	2.93011e-06	40.7444	0.111351	0.177901	40.7445	0.999991	7.66e-05
2370-17A	SRM07	Pagosa Peak Dacite (North)	0.0017377	4.9978e-06	sanidine	12	2001.42	0.247588	223.576	0.195448	2.85589	0.107823	0.368707	0.103803	0.0054499	0.0009738	0.0288476	8.9374	0.0080308	99.932	28.2049	0.0251494	0.0843356	1.19236e-14	2.26957e-06	22.1316	0.111813	0.0883066	22.1317	0.999992	7.83e-05
2370-18A	SRM07	Pagosa Peak Dacite (North)	0.0017377	4.9978e-06	sanidine	12	578.914	0.208087	64.4696	0.18847	0.77246	0.107102	0.0397942	0.112739	0.0011627	0.0010136	0.0108054	8.9662	0.0268707	99.9446	28.2951	0.084145	0.116626	3.43826e-15	1.85019e-06	97.9596	0.111468	0.294594	97.9596	0.999996	4.48e-05
2370-19A	SRM07	Pagosa Peak Dacite (North)	0.0017377	4.9978e-06	sanidine	12	584.428	0.208087	65.1781	0.174222	0.989005	0.107458	0.173843	0.104129	0.0010584	0.0009895	0.0467082	8.95553	0.0246164	99.9692	28.2617	0.077087	0.111572	3.47605e-15	1.0262e-06	170.21	0.111628	0.269715	170.21	0.999999	2.76e-05
2370-20A	SRM07	Pagosa Peak Dacite (North)	0.0017377	4.9978e-06	sanidine	12	483.597	0.208087	53.8216	0.172277	0.697034	0.106414	-0.0518204	0.112258	0.0017832	0.0007523	-0.0168678	8.96607	0.0293153	99.8826	28.2947	0.0918003	0.122263	2.87039e-15	3.92596e-06	42.0997	0.111401	0.323023	42.1002	0.999971	0.0001362
2370-21A	SRM07	Pagosa Peak Dacite (North)	0.0017377	4.9978e-06	sanidine	12	1024.74	0.220227	114.025	0.188259	1.45937	0.106754	0.0513316	0.113225	0.0076561	0.0008821	0.0078926	8.95885	0.0151302	99.7807	28.2721	0.0473805	0.0935712	6.08112e-15	7.33824e-06	12.2774	0.111377	0.166527	12.2782	0.999908	0.000226
2370-22A	SRM07	Pagosa Peak Dacite (North)	0.0017377	4.9978e-06	sanidine	12	999.763	0.220227	112.056	0.188765	1.33024	0.106082	0.284621	0.111785	0.0040381	0.0012414	0.0445483	8.90473	0.0155209	99.8993	28.1026	0.0486087	0.0937882	5.9761e-15	3.36674e-06	37.7441	0.112187	0.169923	37.7442	0.99999	7.57e-05
2370-23A	SRM07	Pagosa Peak Dacite (North)	0.0017377	4.9978e-06	sanidine	12	215.034	0.193776	23.8211	0.170077	0.218216	0.106414	-0.144217	0.112739	0.0010276	0.0007648	-0.106223	9.00072	0.0655996	99.8069	28.4032	0.205412	0.220827	1.27041e-15	6.46206e-06	58.4034	0.110888	0.719742	58.4063	0.999924	0.0001933
2370-24A	SRM07	Pagosa Peak Dacite (North)	0.0017377	4.9978e-06	sanidine	12	571.589	0.214009	63.8302	0.187945	0.776197	0.107822	0.114592	0.103803	0.0101651	0.000897	0.0315219	8.9002	0.0267942	99.483	28.0884	0.0839149	0.116055	3.40416e-15	1.73e-05	9.41458	0.111776	0.296872	9.41865	0.999503	0.0005018
2370-25A	SRM07	Pagosa Peak Dacite (North)	0.0017377	4.9978e-06	sanidine	12	470.812	0.197231	52.3396	0.174165	0.759086	0.106414	0.160252	0.105157	0.0008986	0.0009815	0.0537801	8.98418	0.0307011	99.9689	28.3514	0.096137	0.125655	2.79136e-15	1.03555e-06	207.959	0.111272	0.335451	207.959	0.999999	2.52e-05
2370-26A	SRM07	Pagosa Peak Dacite (North)	0.0017377	4.9978e-06	sanidine	12	1714.3	0.233452	191.113	0.189604	2.50118	0.106082	0.223414	0.103175	0.0097223	0.0009196	0.0205414	8.94733	0.0091071	99.8404	28.236	0.0285197	0.0854842	1.01924e-14	5.33791e-06	10.4128	0.111587	0.100159	10.4131	0.999954	0.0001779
2370-27A	SRM07	Pagosa Peak Dacite (North)	0.0017377	4.9978e-06	sanidine	12	422.21	0.197231	46.9872	0.172993	0.407914	0.109756	0.202784	0.115234	0.0028972	0.000804	0.0759983	8.96183	0.0337193	99.8267	28.2814	0.105592	0.132908	2.5059e-15	5.79711e-06	34.7664	0.111391	0.3712	34.7676	0.999943	0.0001692
2370-28A	SRM07	Pagosa Peak Dacite (North)	0.0017377	4.9978e-06	sanidine	12	1157.51	0.226716	129.138	0.194316	1.61848	0.106414	-0.005182	0.114217	0.0097978	0.0008603	-0.0007069	8.93216	0.0137337	99.7469	28.1885	0.0430094	0.0912268	6.88714e-15	8.46898e-06	9.2172	0.111672	0.151767	9.21813	0.999865	0.0002744
2370-29A	SRM07	Pagosa Peak Dacite (North)	0.0017377	4.9978e-06	sanidine	12	430.418	0.202485	48.2004	0.182403	0.636358	0.106754	0.163283	0.105516	-6.45e-05	0.0010136	0.0596985	8.92435	0.0346624	100.032	28.164	0.108552	0.135074	2.57061e-15	-1.0876e-06	-223.304	0.112089	0.381415	-223.305	0.999999	2.6e-05
2370-30A	SRM07	Pagosa Peak Dacite (North)	0.0017377	4.9978e-06	sanidine	12	942.755	0.214009	104.943	0.194122	1.40135	0.107102	0.0579802	0.103803	0.0080294	0.0012416	0.0097437	8.95265	0.0170875	99.7507	28.2527	0.0535103	0.0967737	5.59677e-15	8.3421e-06	16.1096	0.11142	0.1864	16.1104	0.999933	0.0001717
2370-31A	SRM07	Pagosa Peak Dacite (North)	0.0017377	4.9978e-06	sanidine	12	599.405	0.208087	66.7319	0.170228	0.80806	0.106754	0.0131018	0.103803	0.0028595	0.0007776	0.0034638	8.9611	0.0233766	99.8588	28.2791	0.0732039	0.108962	3.55893e-15	4.72144e-06	28.8801	0.111436	0.25749	28.8807	0.99996	0.0001622
2370-32A	SRM07	Pagosa Peak Dacite (North)	0.0017377	4.9978e-06	sanidine	12	1468.81	0.233452	163.929	0.194663	2.06003	0.106414	0.104716	0.104464	0.0070564	0.0013297	0.011274	8.93914	0.0110111	99.8617	28.2103	0.0344825	0.0875872	8.74263e-15	4.62446e-06	19.9311	0.111713	0.119828	19.9313	0.999982	0.0001058
2372-01A	SRM08	Fish Canyon Tuff	0.0017377	4.9978e-06	sanidine	12	1277.03	0.220227	141.842	0.194433	1.80247	0.106082	0.206109	0.104807	0.0268237	0.0010478	0.0256645	8.93938	0.0125782	99.3845	28.2111	0.0393902	0.0896348	7.56467e-15	2.06e-05	4.09738	0.111176	0.138183	4.09945	0.999432	0.0005256
2372-02A	SRM08	Fish Canyon Tuff	0.0017377	4.9978e-06	sanidine	12	852.216	0.214009	95.0327	0.194055	1.36427	0.107102	0.147737	0.104129	0.0044948	0.0008457	0.0274678	8.94631	0.0186314	99.8564	28.2328	0.058346	0.0994835	5.06826e-15	4.80334e-06	21.5635	0.111617	0.205774	21.5641	0.999954	0.0001422
2372-03A	SRM08	Fish Canyon Tuff	0.0017377	4.9978e-06	sanidine	12	840.686	0.214009	93.3474	0.18863	1.12993	0.107458	-0.0386209	0.103485	0.0144236	0.0012419	-0.0073129	8.95099	0.0186938	99.4841	28.2475	0.0585408	0.0996315	4.97838e-15	1.73e-05	8.72605	0.111143	0.203705	8.72812	0.999728	0.0003648
2372-04A	SRM08	Fish Canyon Tuff	0.0017377	4.9978e-06	sanidine	12	1387.19	0.233452	154.786	0.194564	1.92864	0.106414	0.317082	0.102873	0.0085825	0.0009045	0.0362354	8.93851	0.0115006	99.8317	28.2084	0.0360156	0.088197	8.25502e-15	5.62999e-06	12.016	0.111687	0.126844	12.0165	0.999944	0.0001859
2372-05A	SRM08	Fish Canyon Tuff	0.0017377	4.9978e-06	sanidine	12	1406.5	0.226716	156.575	0.194583	2.16318	0.106754	0.0335366	0.105516	0.0163458	0.0009902	0.0037901	8.94349	0.0113975	99.6557	28.2239	0.0356925	0.0881058	8.35043e-15	1.15e-05	6.31027	0.111428	0.125337	6.31129	0.999803	0.0003287
2372-06A	SRM08	Fish Canyon Tuff	0.0017377	4.9978e-06	sanidine	12	1109.03	0.247588	123.835	0.188862	1.7655	0.106082	0.107943	0.104807	0.0066692	0.0012415	0.0154302	8.93196	0.0141215	99.8288	28.1879	0.0442239	0.091804	6.60433e-15	5.7281e-06	19.9533	0.111766	0.154165	19.9537	0.99997	0.0001621
2372-07A	SRM08	Fish Canyon Tuff	0.0017377	4.9978e-06	sanidine	12	559.124	0.208087	62.3334	0.185891	0.770199	0.106082	0.166803	0.103175	0.0048552	0.0010299	0.0474051	8.94021	0.0273628	99.7621	28.2137	0.0856899	0.117587	3.32435e-15	7.96026e-06	23.8195	0.111588	0.300592	23.8209	0.99992	0.0001936
2372-08A	SRM08	Fish Canyon Tuff	0.0017377	4.9978e-06	sanidine	12	1036.76	0.220227	115.529	0.188792	1.48729	0.107102	0.0864326	0.105516	0.0133751	0.0009352	0.0132583	8.93157	0.0149497	99.6211	28.1866	0.0468174	0.0930781	6.16138e-15	1.27e-05	7.3747	0.111538	0.16482	7.37623	0.99975	0.0003714
2372-09A	SRM08	Fish Canyon Tuff	0.0017377	4.9978e-06	sanidine	12	1048.92	0.214009	103.59	0.1887	1.37489	0.107458	0.273671	0.104129	0.407148	0.0026721	0.0468358	8.94582	0.0181711	88.4283	28.2313	0.0569045	0.0986415	5.52463e-15	0.0003876	0.660667	0.0988487	0.183332	0.684921	0.96353	0.0034385
2372-10A	SRM08	Fish Canyon Tuff	0.0017377	4.9978e-06	sanidine	12	389.654	0.202485	43.7311	0.170469	0.759775	0.107822	0.131995	0.103485	0.0022558	0.0007712	0.0535497	8.88903	0.0354155	99.8553	28.0534	0.110918	0.136798	2.33226e-15	4.83945e-06	43.0285	0.112335	0.393337	43.0295	0.999958	0.0001596
2372-11A	SRM08	Fish Canyon Tuff	0.0017377	4.9978e-06	sanidine	12	536.851	0.208087	59.206	0.172669	0.837857	0.106754	-0.0141773	0.103803	0.0043607	0.0010709	-0.0042499	9.03685	0.0271788	99.7568	28.5163	0.0850997	0.117749	3.15756e-15	8.14021e-06	25.1835	0.110389	0.294257	25.1847	0.999932	0.0002028
2372-12A	SRM08	Fish Canyon Tuff	0.0017377	4.9978e-06	sanidine	12	500.225	0.208087	55.5023	0.170858	0.702934	0.107458	0.0209237	0.110404	0.0062422	0.0008387	0.0066933	8.97086	0.0282881	99.6305	28.3097	0.088583	0.119895	2.96004e-15	1.24e-05	14.2366	0.11106	0.310693	14.2393	0.999762	0.0003914
2372-13A	SRM08	Fish Canyon Tuff	0.0017377	4.9978e-06	sanidine	12	567.837	0.214009	63.2687	0.182464	0.849264	0.108194	0.0738197	0.103485	0.0053417	0.0008109	0.0207311	8.94224	0.0263346	99.7292	28.2201	0.0824696	0.115274	3.37424e-15	9.06326e-06	16.5043	0.111526	0.290901	16.5063	0.999845	0.000296
2372-14A	SRM08	Fish Canyon Tuff	0.0017377	4.9978e-06	sanidine	12	1690.43	0.247588	188.136	0.189564	2.4289	0.106414	0.191638	0.112258	0.0110508	0.000974	0.0181055	8.95991	0.0092875	99.8133	28.2754	0.0290839	0.0857791	1.00337e-14	6.24594e-06	9.58362	0.1114	0.101837	9.58398	0.999944	0.0002199
2372-15A	SRM08	Fish Canyon Tuff	0.0017377	4.9978e-06	sanidine	12	586.361	0.197231	65.4353	0.188474	0.717488	0.106754	0.047225	0.104129	0.0035813	0.0008108	0.0128329	8.93653	0.0262219	99.8223	28.2022	0.0821176	0.114987	3.48978e-15	5.94484e-06	24.3796	0.111701	0.290041	24.3808	0.999929	0.0001601
2372-16A	SRM08	Fish Canyon Tuff	0.0017377	4.9978e-06	sanidine	12	793.531	0.214009	88.5828	0.188599	1.09993	0.107102	0.112147	0.104807	0.0032686	0.0008967	0.0225601	8.93951	0.0194588	99.8872	28.2115	0.0609375	0.100977	4.72429e-15	3.77086e-06	31.1725	0.111737	0.214648	31.1729	0.999976	0.0001088
2372-17A	SRM08	Fish Canyon Tuff	0.0017377	4.9978e-06	sanidine	12	936.678	0.220227	104.797	0.194121	1.48867	0.106754	-0.142946	0.104464	0.0043756	0.0008386	-0.0243159	8.91611	0.0168527	99.8507	28.1382	0.0527786	0.0961	5.589e-15	4.99337e-06	18.7461	0.111989	0.186753	18.7467	0.99995	0.000158
2372-18A	SRM08	Fish Canyon Tuff	0.0017377	4.9978e-06	sanidine	12	520.923	0.202485	57.7737	0.188441	0.827039	0.108573	0.0187727	0.103803	0.0052295	0.0008316	0.0057946	8.9814	0.0298619	99.7042	28.3427	0.0935096	0.123641	3.08118e-15	9.90055e-06	16.8626	0.111012	0.328537	16.8651	0.99981	0.0002729
2372-19A	SRM08	Fish Canyon Tuff	0.0017377	4.9978e-06	sanidine	12	302.133	0.197231	33.8733	0.1701	0.379101	0.107822	0.147933	0.104129	-0.0005461	0.0009975	0.0779393	8.91914	0.0460927	100.089	28.1477	0.14435	0.1652	1.80653e-15	-2.9749e-06	-114.563	0.112218	0.506495	-114.565	0.99999	7.35e-05
2372-20A	SRM08	Fish Canyon Tuff	0.0017377	4.9978e-06	sanidine	12	240.593	0.197231	26.7744	0.171116	0.320982	0.107102	0.121436	0.104807	0.0019024	0.0007712	0.0809729	8.95973	0.0584708	99.8002	28.2748	0.183102	0.200096	1.42793e-15	6.68405e-06	50.5476	0.111388	0.644472	50.5504	0.999919	0.0002064
2372-21A	SRM08	Fish Canyon Tuff	0.0017377	4.9978e-06	sanidine	12	1762.2	0.226716	197.34	0.188145	2.6008	0.107823	0.274648	0.103485	0.0143471	0.0009664	0.0248562	8.90066	0.0087206	99.7687	28.0898	0.0273115	0.0846968	1.05245e-14	7.7388e-06	7.32729	0.112091	0.0962225	7.32776	0.999914	0.0002349
2372-22A	SRM08	Fish Canyon Tuff	0.0017377	4.9978e-06	sanidine	11.9429	540.992	0.208087	60.2016	0.186388	0.711293	0.108194	0.130431	0.113225	0.0015141	0.000804	0.038718	8.97192	0.028327	99.9335	28.313	0.0887046	0.119991	3.21067e-15	2.22117e-06	70.7904	0.111385	0.312045	70.7905	0.99999	6.7e-05
2372-23A	SRM08	Fish Canyon Tuff	0.0017377	4.9978e-06	sanidine	12	508.767	0.208087	56.3693	0.169845	0.979663	0.106754	0.0103641	0.102873	0.0126712	0.000875	0.0032869	8.9504	0.027662	99.2614	28.2456	0.0866255	0.118332	3.00629e-15	2.47e-05	7.23875	0.110902	0.304125	7.2444	0.999119	0.0007603
2372-24A	SRM08	Fish Canyon Tuff	0.0017377	4.9978e-06	sanidine	12	287.087	0.193298	32.5404	0.184294	0.457773	0.106414	0.353846	0.104807	0.0020007	0.0007585	0.194471	8.80437	0.05078	99.8829	27.7883	0.159061	0.17774	1.73544e-15	3.91349e-06	71.2977	0.113447	0.570488	71.2989	0.999968	0.0001115
2372-25A	SRM08	Fish Canyon Tuff	0.0017377	4.9978e-06	sanidine	12	246.677	0.197231	27.6513	0.188351	0.518448	0.106754	0.0817394	0.105157	0.0078557	0.0007909	0.0529057	8.83045	0.061263	99.0779	27.8699	0.191888	0.207724	1.4747e-15	3.09e-05	10.925	0.1122	0.685975	10.9447	0.998035	0.0008535
2372-26A	SRM08	Fish Canyon Tuff	0.0017377	4.9978e-06	sanidine	12	556.135	0.208087	62.4304	0.19388	0.762332	0.107822	0.0596424	0.103485	0.0001479	0.0009346	0.0171044	8.89958	0.0282385	99.9997	28.0865	0.0884384	0.119363	3.32954e-15	3.91426e-09	44501.5	0.112364	0.312856	44501.5	1	1.00612e-07
2372-27A	SRM08	Fish Canyon Tuff	0.0017377	4.9978e-06	sanidine	12	515.319	0.208087	57.5837	0.18844	0.744925	0.106082	0.114298	0.104464	0.00251	0.0008176	0.035551	8.92908	0.0297945	99.8711	28.1788	0.093307	0.123184	3.07105e-15	4.31111e-06	38.5811	0.111849	0.32979	38.5819	0.999964	0.0001282
2372-28A	SRM08	Fish Canyon Tuff	0.0017377	4.9978e-06	sanidine	12	1421.93	0.226716	158.924	0.18869	2.13398	0.106754	0.386404	0.104129	0.013112	0.0009429	0.04358	8.91602	0.0108598	99.7452	28.138	0.0340102	0.0872135	8.47575e-15	8.52747e-06	8.05901	0.111872	0.119818	8.05969	0.999889	0.0002634
2372-29A	SRM08	Fish Canyon Tuff	0.0017377	4.9978e-06	sanidine	12	431.321	0.197231	48.0647	0.170484	0.568012	0.106082	0.128671	0.104129	0.0004756	0.0009657	0.0480014	8.9643	0.0326749	99.9884	28.2891	0.102321	0.130338	2.56339e-15	3.82534e-07	605.656	0.111541	0.357702	605.656	1	9.65692e-06
2372-30A	SRM08	Fish Canyon Tuff	0.0017377	4.9978e-06	sanidine	12	728.276	0.214009	81.4692	0.184989	1.15136	0.107822	0.120947	0.105516	0.0008876	0.0010708	0.0266294	8.92877	0.0208559	99.977	28.1779	0.0653141	0.103603	4.34491e-15	7.6368e-07	198.152	0.111972	0.229002	198.152	0.999999	1.9e-05
2372-31A	SRM08	Fish Canyon Tuff	0.0017377	4.9978e-06	sanidine	12	600.056	0.202485	66.8962	0.188481	0.775017	0.106082	0.122902	0.105157	0.0009184	0.0007342	0.0329796	8.95868	0.0256764	99.9686	28.2715	0.0804061	0.11391	3.56771e-15	1.04472e-06	124.204	0.111589	0.283818	124.204	0.999997	3.23e-05
2371-01A	SRM09	Fish Canyon Tuff	0.0017377	4.9978e-06	sanidine	12	458.409	0.202485	50.9978	0.171901	0.775804	0.107458	0.368903	0.104807	0.0069363	0.0008247	0.1299	8.94555	0.0308523	99.6091	28.2304	0.0966167	0.125803	2.71982e-15	1.31e-05	14.4087	0.111351	0.340035	14.412	0.999722	0.0003984
2371-02A	SRM09	Fish Canyon Tuff	0.0017377	4.9978e-06	sanidine	12	3730.85	0.294109	415.453	0.211096	5.18448	0.107103	0.387382	0.105516	0.0494227	0.0018849	0.0167505	8.93686	0.0048351	99.612	28.2032	0.0151419	0.0819055	2.2157e-14	1.3e-05	3.92736	0.111462	0.0514281	3.92764	0.999914	0.0003078
2371-03A	SRM09	Fish Canyon Tuff	0.0017377	4.9978e-06	sanidine	12	1969.11	0.247588	219.773	0.195391	2.72185	0.106754	0.312194	0.103175	0.0087245	0.0012416	0.0255377	8.94041	0.0082362	99.8792	28.2143	0.0257928	0.0845551	1.1721e-14	4.03807e-06	15.9423	0.111717	0.089807	15.9424	0.999984	0.0001105
2371-04A	SRM09	Fish Canyon Tuff	0.0017377	4.9978e-06	sanidine	12	553.398	0.202485	61.7549	0.188458	0.837267	0.106082	-0.0250303	0.103175	0.001111	0.0007776	-0.0072894	8.94701	0.0278005	99.9376	28.235	0.0870596	0.11863	3.29352e-15	2.08501e-06	70.9193	0.111699	0.307409	70.9194	0.999991	6.14e-05
2371-05A	SRM09	Fish Canyon Tuff	0.0017377	4.9978e-06	sanidine	12	248.528	0.196224	27.5329	0.170768	0.432007	0.107102	0.131018	0.103803	0.0007298	0.0007523	0.0856119	9.01403	0.0570449	99.9534	28.4449	0.17862	0.196202	1.46839e-15	1.55474e-06	205.707	0.110886	0.625367	205.707	0.999995	4.85e-05
2371-06A	SRM09	Fish Canyon Tuff	0.0017377	4.9978e-06	sanidine	12	652.775	0.208087	72.5052	0.172736	1.0369	0.107458	0.0603268	0.104464	0.0021784	0.0008245	0.0149782	8.98635	0.0219095	99.9085	28.3582	0.0686067	0.106099	3.86685e-15	3.05799e-06	43.2873	0.111178	0.240407	43.2875	0.999985	9.77e-05
2371-07A	SRM09	Fish Canyon Tuff	0.0017377	4.9978e-06	sanidine	12	1064.43	0.226716	118.431	0.187779	1.63411	0.106414	0.391098	0.105157	0.0035327	0.0011465	0.0594706	8.97299	0.0146767	99.9289	28.3163	0.0459592	0.0929686	6.31618e-15	2.37613e-06	46.488	0.111366	0.160011	46.4881	0.999994	6.1e-05
2371-08A	SRM09	Fish Canyon Tuff	0.0017377	4.9978e-06	sanidine	12	519.028	0.208087	58.1066	0.188442	0.833235	0.107458	0.118209	0.104464	0.0006513	0.0007906	0.0366498	8.92218	0.0294859	99.9807	28.1572	0.0923416	0.122414	3.09895e-15	6.40915e-07	250.063	0.112059	0.326836	250.063	0.999999	1.97e-05
2371-09A	SRM09	Fish Canyon Tuff	0.0017377	4.9978e-06	sanidine	12	1808	0.234934	202.091	0.251293	2.7604	0.116495	0.147639	0.115494	0.0107702	0.0015682	0.0137313	8.92253	0.0114224	99.8293	28.1583	0.0357718	0.0879681	1.07781e-14	5.71122e-06	15.4612	0.111884	0.125046	15.4616	0.999967	8.74e-05
2371-10A	SRM09	Fish Canyon Tuff	0.0017377	4.9978e-06	sanidine	12	1240.98	0.219986	138.341	0.246153	1.67119	0.116822	-0.0896591	0.115494	0.0183603	0.0011213	-0.012186	8.92159	0.0161666	99.5524	28.1554	0.0506293	0.0949777	7.37811e-15	1.5e-05	6.23932	0.111586	0.178844	6.24157	0.99959	0.0002818
2371-11A	SRM09	Fish Canyon Tuff	0.0017377	4.9978e-06	sanidine	12	1011.5	0.205898	112.363	0.241323	1.37115	0.117157	0.134538	0.115796	0.0168662	0.0010124	0.0225216	8.94952	0.0195279	99.5121	28.2428	0.0611529	0.101178	5.99265e-15	1.63e-05	6.38885	0.111193	0.215773	6.39208	0.99943	0.0003007
2371-12A	SRM09	Fish Canyon Tuff	0.0017377	4.9978e-06	sanidine	12	2358.3	0.234934	263.351	0.247502	3.26499	0.116495	0.212268	0.114635	0.0089677	0.0015681	0.0151723	8.93675	0.0086623	99.8933	28.2029	0.0271273	0.0849409	1.40453e-14	3.56724e-06	18.9727	0.111778	0.094525	18.9728	0.999988	5.54e-05
2371-13A	SRM09	Fish Canyon Tuff	0.0017377	4.9978e-06	sanidine	12	582.499	0.199233	64.745	0.237961	0.866965	0.117499	0.20122	0.115796	0.0072416	0.0009516	0.0585234	8.95735	0.0334026	99.656	28.2674	0.104601	0.132098	3.45304e-15	1.15e-05	14.872	0.111256	0.369196	14.8758	0.999692	0.0002132
2371-14A	SRM09	Fish Canyon Tuff	0.0017377	4.9978e-06	sanidine	12	1074.13	0.212823	119.461	0.246022	1.55898	0.116174	0.126422	0.117077	0.0103785	0.0009914	0.0199353	8.95769	0.0187309	99.721	28.2684	0.0586562	0.0997474	6.37123e-15	9.34001e-06	10.3328	0.111324	0.206931	10.3345	0.9998	0.0001837
2371-15A	SRM09	Fish Canyon Tuff	0.0017377	4.9978e-06	sanidine	12	1162.93	0.205898	129.528	0.241843	1.73098	0.116174	0.119089	0.115494	0.0104687	0.0009914	0.0173324	8.94619	0.0169654	99.7397	28.2324	0.0531287	0.0965153	6.90811e-15	8.71056e-06	10.2225	0.111489	0.187583	10.2239	0.999832	0.0001636
2371-16A	SRM09	Fish Canyon Tuff	0.0017377	4.9978e-06	sanidine	12	996.876	0.212823	110.499	0.241718	1.49693	0.115557	-0.0089952	0.116105	0.0237522	0.0015689	-0.0015352	8.94866	0.0201541	99.2886	28.2402	0.0631139	0.102369	5.89325e-15	2.38e-05	6.72835	0.110953	0.219828	6.73164	0.999467	0.0003083
2371-17A	SRM09	Fish Canyon Tuff	0.0017377	4.9978e-06	sanidine	12	856.94	0.199233	95.3526	0.245882	1.30212	0.116822	0.0418475	0.115494	0.0328665	0.0015697	0.0082796	8.87593	0.0235377	98.8594	28.0124	0.0737193	0.108752	5.08544e-15	3.82e-05	4.88251	0.111379	0.258958	4.88899	0.998597	0.0004277
2371-18A	SRM09	Fish Canyon Tuff	0.0017377	4.9978e-06	sanidine	11.9455	1036.04	0.199233	114.741	0.241744	1.55652	0.117157	0.516542	0.115796	0.0291205	0.001184	0.0849935	8.94875	0.019216	99.1998	28.2404	0.0601764	0.100585	6.11947e-15	2.68e-05	4.40057	0.110853	0.211607	4.40528	0.998846	0.0003973
2371-19A	SRM09	Fish Canyon Tuff	0.0017377	4.9978e-06	sanidine	12	829.875	0.199233	92.1903	0.238081	1.09561	0.115862	-0.0225859	0.116105	0.0065367	0.0009777	-0.0046272	8.9716	0.0235212	99.7622	28.312	0.0736556	0.109335	4.91678e-15	7.95694e-06	15.4933	0.111198	0.259408	15.495	0.99986	0.0001435
2371-20A	SRM09	Fish Canyon Tuff	0.0017377	4.9978e-06	sanidine	12	562.349	0.186799	62.4224	0.229957	0.702148	0.117848	0.0716686	0.115494	0.0071976	0.0009645	0.0216927	8.96648	0.0335357	99.6267	28.296	0.105016	0.132476	3.32917e-15	1.25e-05	14.3716	0.11111	0.369951	14.3756	0.999669	0.0002076
2371-21A	SRM09	Fish Canyon Tuff	0.0017377	4.9978e-06	sanidine	12	820.812	0.192857	91.934	0.241615	1.08872	0.116494	0.051136	0.1152	0.007335	0.0012298	0.0105171	8.89618	0.0238481	99.7375	28.0758	0.0746889	0.109543	4.90312e-15	8.78687e-06	17.55	0.112113	0.263909	17.5516	0.999887	0.0001193
2371-22A	SRM09	Fish Canyon Tuff	0.0017377	4.9978e-06	sanidine	12	695.983	0.192857	77.4782	0.239548	1.04162	0.117848	0.169541	0.121595	0.0104178	0.0013952	0.0413908	8.93598	0.0283004	99.5725	28.2005	0.0886266	0.119719	4.13214e-15	1.43e-05	14.3636	0.111429	0.31048	14.3665	0.999767	0.0001723
2371-23A	SRM09	Fish Canyon Tuff	0.0017377	4.9978e-06	sanidine	12	1209.47	0.205898	134.963	0.241883	1.69371	0.116494	0.173843	0.115494	0.0085747	0.0010118	0.0243733	8.93489	0.0162721	99.7994	28.197	0.0509584	0.0952532	7.19798e-15	6.71105e-06	13.0024	0.111696	0.180061	13.0033	0.999904	0.0001239
2371-24A	SRM09	Fish Canyon Tuff	0.0017377	4.9978e-06	sanidine	12	754.489	0.192857	84.0486	0.239971	1.00297	0.116174	0.162794	0.114914	0.0064258	0.0011588	0.0366779	8.94683	0.0260144	99.7619	28.2344	0.0814664	0.114587	4.48257e-15	7.96793e-06	19.908	0.111505	0.28671	19.9096	0.999896	0.0001145
2371-25A	SRM09	Fish Canyon Tuff	0.0017377	4.9978e-06	sanidine	12	823.043	0.199233	91.6546	0.245864	1.11114	0.115862	0.262427	0.116105	0.0077951	0.0009778	0.0542389	8.94807	0.0243483	99.7415	28.2383	0.0762484	0.110946	4.88822e-15	8.65069e-06	14.3735	0.111467	0.269393	14.3755	0.999825	0.0001514
2371-26A	SRM09	Fish Canyon Tuff	0.0017377	4.9978e-06	sanidine	12	1067.71	0.199233	119.085	0.240167	1.31864	0.116494	0.0707887	0.115796	0.0027213	0.0012296	0.0112648	8.95072	0.0184216	99.9279	28.2466	0.0576885	0.0991311	6.35119e-15	2.40718e-06	49.2623	0.111642	0.202574	49.2625	0.999992	3.49e-05
2371-27A	SRM09	Fish Canyon Tuff	0.0017377	4.9978e-06	sanidine	12	400.913	0.186799	44.8859	0.239438	0.518645	0.116822	0.799697	0.115494	0.0040347	0.0011742	0.337877	8.91114	0.0484219	99.853	28.1227	0.151646	0.171579	2.3939e-15	4.91858e-06	61.4764	0.112054	0.535632	61.4779	0.999962	6.6e-05
2371-28A	SRM09	Fish Canyon Tuff	0.0017377	4.9978e-06	sanidine	12	556.148	0.192857	62.1337	0.241489	0.857525	0.117848	0.140795	0.1152	7.85e-05	0.0011127	0.04299	8.9437	0.0353547	100.016	28.2246	0.110717	0.13692	3.31378e-15	-5.5571e-07	-372.943	0.111829	0.390279	-372.944	1	8.26632e-06
2371-29A	SRM09	Fish Canyon Tuff	0.0017377	4.9978e-06	sanidine	12	797.028	0.205898	88.8662	0.228685	1.11036	0.115259	-0.0566114	0.123758	0.0054699	0.0009515	-0.0120903	8.9412	0.023388	99.7896	28.2168	0.0732421	0.108857	4.73951e-15	7.04104e-06	17.9012	0.111606	0.258674	17.9025	0.999896	0.0001442
Incremental Heating Analyses
2361-35A	FCs-C1	Fish Canyon Tuff	0.0017377	4.9978e-06	sanidine	0.8	72.8817	0.272927	7.59618	0.211419	-0.0679529	0.0842713	-0.036861	0.115494	0.0063126	0.0010614	-6.68928	9.02323	0.958821	94.5229	28.4737	3.00224	3.00334	4.05746e-16	0.0001834	163.022	0.104755	2.91485	162.242	0.99984	0.0002953
2361-35B	FCs-C1	Fish Canyon Tuff	0.0017377	4.9978e-06	sanidine	1	847.598	0.310644	93.957	0.228157	0.920856	0.0872483	-0.26008	0.127039	0.0157386	0.0011535	-3.81726	8.77985	0.0849723	97.7125	27.7114	0.266174	0.277679	5.01867e-15	7.66e-05	36.9325	0.111292	0.255518	36.8617	0.999976	0.0001424
2361-35C	FCs-C1	Fish Canyon Tuff	0.0017377	4.9978e-06	sanidine	1.2	1255.73	0.310644	139.803	0.233382	1.61209	0.0862226	0.0476161	0.117761	0.019465	0.0011077	0.469871	8.93885	0.0535554	99.7489	28.2094	0.167715	0.186039	7.46749e-15	8.40434e-06	210.754	0.11159	0.174641	210.709	1	1.66e-05
2361-35D	FCs-C1	Fish Canyon Tuff	0.0017377	4.9978e-06	sanidine	1.4	3952.05	0.396989	442.253	0.238338	5.44597	0.0867324	0.193105	0.116746	0.0281995	0.0012917	0.602597	8.92142	0.0168514	100.062	28.1549	0.052774	0.0961368	2.36228e-14	-2.08974e-06	-267.224	0.112159	0.0566053	-267.238	1	6.67519e-06
2361-35E	FCs-C1	Fish Canyon Tuff	0.0017377	4.9978e-06	sanidine	1.6	3159.18	0.367696	353.199	0.246971	4.20856	0.084272	0.143728	0.127039	0.0203395	0.0012907	0.561816	8.92967	0.0228629	100.063	28.1807	0.0715993	0.107682	1.8866e-14	-2.12531e-06	-357.717	0.112057	0.073443	-357.736	1	5.15969e-06
2361-35F	FCs-C1	Fish Canyon Tuff	0.0017377	4.9978e-06	sanidine	1.8	723.339	0.295297	80.2836	0.228088	0.857131	0.0847462	-0.0310923	0.116746	0.0039624	0.0010035	-0.535014	8.94862	0.0924254	99.5904	28.2401	0.289437	0.300449	4.28831e-15	1.37e-05	222.536	0.111291	0.297232	222.458	0.999999	2.52e-05
2361-35G	FCs-C1	Fish Canyon Tuff	0.0017377	4.9978e-06	sanidine	2	799.049	0.290689	88.8496	0.238283	1.10987	0.0852299	0.0173061	0.117415	0.0028105	0.0010105	0.269183	8.9733	0.0843329	100.017	28.3173	0.264084	0.276173	4.74586e-15	-5.94056e-07	-4679.24	0.111461	0.279689	-4679.31	1	1.01191e-06
2361-35H	FCs-C1	Fish Canyon Tuff	0.0017377	4.9978e-06	sanidine	3	1679.23	0.316228	186.243	0.239029	2.31286	0.0872485	0.0934723	0.118473	0.0166387	0.0011614	0.693863	8.99785	0.0406315	100.019	28.3942	0.12723	0.150844	9.9481e-15	-6.25613e-07	-2134.79	0.111158	0.134114	-2134.82	1	1.23947e-06
2361-35I	FCs-C1	Fish Canyon Tuff	0.0017377	4.9978e-06	sanidine	5	1784.92	0.316228	198.472	0.233947	2.36439	0.0833484	0.0728419	0.116105	0.0161065	0.0010847	0.507599	8.96901	0.0373527	99.96	28.3039	0.116969	0.142151	1.06013e-14	1.332e-06	924.684	0.11145	0.123239	924.653	1	2.75616e-06
2361-35J	FCs-C1	Fish Canyon Tuff	0.0017377	4.9978e-06	sanidine	12	1182.34	0.300167	130.412	0.228395	1.33575	0.0867314	-0.052896	0.117415	0.0163289	0.0011771	-0.561186	8.981	0.057336	99.3303	28.3414	0.179542	0.196921	6.96591e-15	2.24e-05	83.8981	0.110601	0.183329	83.8504	0.999998	4.19e-05
2362-76A	SRM01	Dacite of Nutras Creek	0.0017377	4.9978e-06	sanidine	0.8	70.6515	0.275465	6.62972	0.221999	0.0577256	0.0862225	0.0575891	0.117077	0.0395517	0.0013768	12.0275	9.38568	1.13639	87.8822	29.6082	3.55603	3.55703	3.54124e-16	0.0004059	77.452	0.0936344	3.5165	76.5814	0.998971	0.0005585
2362-76B	SRM01	Dacite of Nutras Creek	0.0017377	4.9978e-06	sanidine	1	716.101	0.295297	78.8364	0.228081	1.0131	0.0862226	0.0288435	0.116746	0.0208747	0.001063	0.506779	9.00431	0.0944868	99.3584	28.4144	0.295864	0.306776	4.21101e-15	2.15e-05	143.894	0.110345	0.302808	143.815	0.999998	3.91e-05
2362-76C	SRM01	Dacite of Nutras Creek	0.0017377	4.9978e-06	sanidine	1.2	1615.12	0.328024	181.243	0.238978	2.16692	0.0867315	-0.0302123	0.118113	0.0141273	0.0012007	-0.230985	8.85557	0.0416129	99.6321	27.9486	0.130335	0.15281	9.68103e-15	1.23e-05	112.686	0.112508	0.13787	112.651	0.999999	2.66e-05
2362-76D	SRM01	Dacite of Nutras Creek	0.0017377	4.9978e-06	sanidine	1.4	2656.12	0.367696	297.09	0.245989	3.88345	0.0857225	-0.0734286	0.128029	0.0212849	0.0012095	-0.342614	8.88177	0.0274324	99.6059	28.0307	0.0859165	0.117399	1.58689e-14	1.32e-05	69.3401	0.112146	0.0870408	69.3171	0.999999	3.18e-05
2362-76E	SRM01	Dacite of Nutras Creek	0.0017377	4.9978e-06	sanidine	1.6	3159.45	0.353836	353.327	0.241521	4.38124	0.0877739	-0.151648	0.118113	0.0231038	0.0011701	-0.595187	8.8739	0.0213912	99.5101	28.006	0.0669968	0.104299	1.88728e-14	1.64e-05	43.2748	0.112138	0.0715223	43.257	0.999999	4.05e-05
2362-76F	SRM01	Dacite of Nutras Creek	0.0017377	4.9978e-06	sanidine	1.8	2156.75	0.353836	240.836	0.250938	3.05739	0.0883063	-0.0603268	0.117077	0.0184498	0.0011306	-0.347577	8.89477	0.0312546	99.5869	28.0714	0.0978852	0.126494	1.28642e-14	1.38e-05	74.5747	0.111961	0.108627	74.5489	0.999999	3.32e-05
2362-76G	SRM01	Dacite of Nutras Creek	0.0017377	4.9978e-06	sanidine	2	2098.87	0.340588	233.267	0.239577	2.95846	0.0857223	0.0017599	0.117761	0.0390303	0.0012934	0.010473	8.92589	0.0323543	99.4502	28.1689	0.101324	0.129345	1.24599e-14	1.84e-05	57.9496	0.111418	0.107435	57.9228	0.999998	4.23e-05
2362-76H	SRM01	Dacite of Nutras Creek	0.0017377	4.9978e-06	sanidine	3	3135.24	0.360694	347.751	0.241413	4.36561	0.0847469	0.0423363	0.118473	0.0559504	0.00138	0.169059	8.95278	0.0218665	99.5441	28.2531	0.0684761	0.105787	1.8575e-14	1.53e-05	47.1003	0.111188	0.0727003	47.0822	0.999999	3.87e-05
2362-76I	SRM01	Dacite of Nutras Creek	0.0017377	4.9978e-06	sanidine	5	2044.21	0.340588	227.04	0.239497	2.75018	0.0862228	0.0265946	0.117761	0.0331496	0.0012112	0.162723	8.94487	0.033271	99.589	28.2283	0.104191	0.131706	1.21273e-14	1.38e-05	79.6523	0.111336	0.110358	79.6247	0.999999	3.16e-05
2362-76J	SRM01	Dacite of Nutras Creek	0.0017377	4.9978e-06	sanidine	12	209.767	0.267524	19.9679	0.208989	0.258437	0.085722	0.119871	0.116746	0.10073	0.0015631	8.34268	9.34622	0.375321	88.9024	29.4847	1.17454	1.17755	1.06658e-15	0.0003717	28.524	0.0951213	1.10337	28.2304	0.999253	0.0005171
2363-73A	SRM02	Dacite of Nutras Creek	0.0017377	4.9978e-06	sanidine	0.8	80.8308	0.26	6.89672	0.210783	0.0731649	0.0829003	0.184011	0.117415	0.0631336	0.0013313	37.1018	10.6265	1.12773	89.5945	33.4868	3.52145	3.52274	3.68386e-16	0.0003485	79.3954	0.0843126	3.25163	78.5334	0.999162	0.000401
2363-73B	SRM02	Dacite of Nutras Creek	0.0017377	4.9978e-06	sanidine	1	571.367	0.277849	63.088	0.228016	0.915939	0.0862226	-0.161328	0.128532	0.0126556	0.001131	-3.55731	8.81778	0.129039	97.7399	27.8302	0.404186	0.411918	3.36982e-15	7.57e-05	56.5904	0.110844	0.380183	56.4827	0.999977	0.00011
2363-73C	SRM02	Dacite of Nutras Creek	0.0017377	4.9978e-06	sanidine	1.2	1545.87	0.306105	172.395	0.233672	2.40166	0.0838055	0.0460518	0.117077	0.0184301	0.0011316	0.371745	8.92947	0.0435437	99.8168	28.1801	0.136365	0.158316	9.20843e-15	6.12968e-06	235.418	0.111783	0.14177	235.382	1	1.18e-05
2363-73D	SRM02	Dacite of Nutras Creek	0.0017377	4.9978e-06	sanidine	1.4	2919.95	0.339411	326.807	0.252225	4.23885	0.0862232	-0.146075	0.117415	0.022669	0.0012219	-0.622262	8.86444	0.0231633	99.4853	27.9764	0.0725482	0.107886	1.74563e-14	1.72e-05	44.4849	0.11223	0.0803808	44.4657	0.999998	3.78e-05
2363-73E	SRM02	Dacite of Nutras Creek	0.0017377	4.9978e-06	sanidine	1.6	4122.91	0.408044	461.47	0.249331	5.92843	0.0888477	0.0194571	0.117415	0.0308083	0.0012462	0.0587204	8.89472	0.0164198	99.8049	28.0712	0.0514246	0.0952034	2.46493e-14	6.52961e-06	83.1878	0.112207	0.0566056	83.1742	1	2.08e-05
2363-73F	SRM02	Dacite of Nutras Creek	0.0017377	4.9978e-06	sanidine	1.8	3615.01	0.368782	403.824	0.247999	5.09539	0.0857229	0.0279635	0.117077	0.0160524	0.0012444	0.0964991	8.92202	0.0187178	99.9121	28.1567	0.0586188	0.0994696	2.15701e-14	2.93866e-06	210.334	0.111984	0.0641783	210.318	1	7.7145e-06
2363-73G	SRM02	Dacite of Nutras Creek	0.0017377	4.9978e-06	sanidine	2	2094.07	0.325576	232.972	0.239573	2.95207	0.0857223	-0.0699087	0.116746	0.0212662	0.001324	-0.418328	8.92043	0.0322571	99.5075	28.1517	0.10102	0.129077	1.24441e-14	1.65e-05	64.5656	0.11155	0.107419	64.5388	0.999999	3.49e-05
2363-73H	SRM02	Dacite of Nutras Creek	0.0017377	4.9978e-06	sanidine	3	3583.55	0.384188	398.36	0.253587	5.00462	0.0867323	-0.129942	0.117415	0.0322052	0.0013254	-0.454915	8.92914	0.0190778	99.5257	28.179	0.0597455	0.100188	2.12783e-14	1.59e-05	39.417	0.111462	0.0664628	39.4013	0.999999	4.39e-05
2363-73I	SRM02	Dacite of Nutras Creek	0.0017377	4.9978e-06	sanidine	5	639.196	0.277849	70.8037	0.232968	0.837267	0.0842713	0.14715	0.117077	0.0068044	0.0011089	2.89952	9.10463	0.10663	100.992	28.7285	0.333831	0.34375	3.78196e-15	-3.32e-05	-105.252	0.110924	0.343988	-105.342	0.999995	5.22e-05
2363-73J	SRM02	Dacite of Nutras Creek	0.0017377	4.9978e-06	sanidine	12	535.317	0.268328	59.6006	0.232926	0.751809	0.085722	0.181078	0.117077	0.0171424	0.0011242	4.24035	9.06109	0.126688	100.972	28.5922	0.396656	0.404961	3.18355e-15	-3.26e-05	-128.383	0.111434	0.40861	-128.489	0.999995	4.79e-05
2364-36A	SRM03	Pagosa Peak Dacite (South)	0.0017377	4.9978e-06	sanidine	0.8	143.372	0.248646	4.79991	0.208977	-0.0221265	0.0852298	0.0087019	0.117077	0.331209	0.0026715	2.53513	9.35137	1.57669	31.3515	29.5008	4.93413	4.93485	2.56386e-16	0.0022993	6.84053	0.0335261	4.55517	7.04547	0.832149	0.0009656
2364-36B	SRM03	Pagosa Peak Dacite (South)	0.0017377	4.9978e-06	sanidine	1	545.989	0.272947	59.6314	0.228003	0.931771	0.0852299	-0.166021	0.128532	0.0303558	0.0012461	-3.89468	8.81039	0.137223	96.6103	27.8071	0.429827	0.437094	3.1852e-15	0.0001135	39.7151	0.109655	0.40215	39.6011	0.999949	0.0001566
2364-36C	SRM03	Pagosa Peak Dacite (South)	0.0017377	4.9978e-06	sanidine	1.2	1779.26	0.306105	197.55	0.23915	2.57366	0.0857222	-0.112538	0.116422	0.0511124	0.0014099	-0.797209	8.87195	0.0380361	98.7823	27.9999	0.119129	0.143452	1.05521e-14	4.08e-05	30.7661	0.111342	0.126307	30.7346	0.999992	7.62e-05
2364-36D	SRM03	Pagosa Peak Dacite (South)	0.0017377	4.9978e-06	sanidine	1.4	3358.21	0.361248	374.23	0.241938	4.77657	0.0867322	-0.0215104	0.117077	0.0459872	0.0014924	-0.0804678	8.9111	0.0202435	99.5554	28.1225	0.0633981	0.102283	1.99894e-14	1.49e-05	44.9376	0.111721	0.0676789	44.9209	0.999999	3.81e-05
2364-36E	SRM03	Pagosa Peak Dacite (South)	0.0017377	4.9978e-06	sanidine	1.6	4899.12	0.392046	547.734	0.257259	6.69105	0.0857236	0.0510382	0.117415	0.0382355	0.0014077	0.130498	8.90689	0.0139526	99.8263	28.1094	0.0436966	0.0913559	2.92571e-14	5.81277e-06	79.1132	0.112077	0.0490353	79.1017	1	1.65e-05
2364-36F	SRM03	Pagosa Peak Dacite (South)	0.0017377	4.9978e-06	sanidine	1.8	2808.01	0.332415	312.951	0.24078	4.04325	0.0852304	0.0004889	0.116105	0.0244485	0.0012453	0.0021891	8.92716	0.0240236	99.7423	28.1728	0.0752344	0.110116	1.67162e-14	8.62428e-06	92.014	0.111729	0.0803859	91.9941	1	1.9e-05
2364-36G	SRM03	Pagosa Peak Dacite (South)	0.0017377	4.9978e-06	sanidine	2	557.4	0.283019	61.4779	0.238168	0.688675	0.0833482	0.0302123	0.117077	0.0045655	0.0010195	0.688929	9.05209	0.123335	100.063	28.564	0.386164	0.394674	3.28383e-15	-2.12119e-06	-1900.11	0.110542	0.404163	-1900.22	1	3.35926e-06
2364-36H	SRM03	Pagosa Peak Dacite (South)	0.0017377	4.9978e-06	sanidine	3	2095.37	0.325576	232.503	0.234363	2.91509	0.0847465	-0.0737219	0.116746	0.0334546	0.0013256	-0.444673	8.92718	0.0324458	99.3222	28.1729	0.10161	0.129577	1.24191e-14	2.27e-05	47.1618	0.111258	0.105527	47.1349	0.999997	4.85e-05
2364-36I	SRM03	Pagosa Peak Dacite (South)	0.0017377	4.9978e-06	sanidine	5	2111.21	0.31241	234.076	0.234383	2.95482	0.0857223	-0.0403808	0.117077	0.0204399	0.0013239	-0.242023	8.96012	0.032341	99.602	28.2761	0.101276	0.129496	1.25031e-14	1.33e-05	79.9804	0.111161	0.104765	79.9535	0.999999	2.61e-05
2364-36J	SRM03	Pagosa Peak Dacite (South)	0.0017377	4.9978e-06	sanidine	12	1220.55	0.288444	134.958	0.233345	1.69528	0.0838054	-0.0007822	0.124666	0.0319121	0.0012463	-0.0081342	8.95051	0.059418	99.216	28.246	0.186071	0.202784	7.20878e-15	2.63e-05	74.7694	0.11085	0.181525	74.7198	0.999997	4.12e-05
2365-36A	FCs-C5	Fish Canyon Tuff	0.0017377	4.9978e-06	sanidine	0.8	60.8398	0.255282	5.65323	0.221144	-0.100405	0.0842713	-0.234463	0.124209	0.0096405	0.001102	-58.2435	7.67747	1.35239	73.1189	24.255	4.24434	4.2449	3.01967e-16	0.0009004	43.589	0.0952382	4.02088	42.599	0.995772	0.0010051
2365-36B	FCs-C5	Fish Canyon Tuff	0.0017377	4.9978e-06	sanidine	1	936.358	0.277849	103.694	0.233132	2.01046	0.0862227	-0.125934	0.117077	0.0330414	0.0016623	-1.70617	8.83859	0.0729154	98.1905	27.8954	0.228383	0.241865	5.5388e-15	6.06e-05	39.743	0.111093	0.23473	39.6827	0.999983	9.44e-05
2365-36C	FCs-C5	Fish Canyon Tuff	0.0017377	4.9978e-06	sanidine	1.2	2390.3	0.339411	266.965	0.240044	3.31258	0.0867318	-0.0312878	0.116746	0.0223345	0.001245	-0.164711	8.89899	0.028355	99.6461	28.0846	0.0888033	0.11963	1.42599e-14	1.18e-05	79.3398	0.111975	0.0940604	79.3162	0.999999	2.7e-05
2365-36D	FCs-C5	Fish Canyon Tuff	0.0017377	4.9978e-06	sanidine	1.4	3151.52	0.332415	351.968	0.241494	4.35046	0.084272	-0.0614023	0.117077	0.028349	0.0013249	-0.245273	8.89675	0.0215855	99.6196	28.0776	0.0676027	0.104844	1.88003e-14	1.27e-05	56.1838	0.111973	0.0717176	56.1658	0.999999	2.76e-05
2365-36E	FCs-C5	Fish Canyon Tuff	0.0017377	4.9978e-06	sanidine	1.6	3010.37	0.346554	336.109	0.241194	4.39973	0.0877739	-0.0360788	0.116746	0.0185462	0.0012446	-0.150975	8.91113	0.0225549	99.7489	28.1226	0.070637	0.106921	1.79532e-14	8.40301e-06	88.8967	0.111937	0.0750772	88.8779	1	1.99e-05
2365-36F	FCs-C5	Fish Canyon Tuff	0.0017377	4.9978e-06	sanidine	1.8	1858.08	0.318904	207.421	0.23405	2.62017	0.0852301	-0.0544604	0.118473	0.0078895	0.0011162	-0.369514	8.90795	0.0369522	99.7055	28.1127	0.115726	0.140821	1.10794e-14	9.85759e-06	124.626	0.111929	0.118254	124.595	1	2e-05
2365-36G	FCs-C5	Fish Canyon Tuff	0.0017377	4.9978e-06	sanidine	2	1976.11	0.325576	220.018	0.234203	2.58516	0.0857222	0.102859	0.118113	0.0083095	0.00119	0.65819	8.97678	0.0348125	100.172	28.3282	0.109013	0.135721	1.17522e-14	-5.77864e-06	-199.4	0.11159	0.111616	-199.429	1	1.22e-05
2365-36H	FCs-C5	Fish Canyon Tuff	0.0017377	4.9978e-06	sanidine	3	3171.83	0.353836	352.767	0.236348	4.48194	0.087774	-0.0870192	0.116746	0.0135764	0.0012442	-0.347425	8.94201	0.0214939	99.7153	28.2193	0.0673106	0.104963	1.8843e-14	9.5297e-06	74.4988	0.111513	0.0702504	74.481	1	2.38e-05
2365-36I	FCs-C5	Fish Canyon Tuff	0.0017377	4.9978e-06	sanidine	5	1423.46	0.3	157.706	0.233534	2.12424	0.0838054	0.0004889	0.116746	0.0174661	0.0011609	0.0043676	8.97086	0.0480432	99.6381	28.3097	0.150445	0.170768	8.42382e-15	1.21e-05	130.598	0.111069	0.154889	130.558	0.999999	2.2e-05
2365-36J	FCs-C5	Fish Canyon Tuff	0.0017377	4.9978e-06	sanidine	12	852.492	0.288444	93.8746	0.228157	1.16199	0.0872484	-0.0082131	0.116746	0.0232356	0.0012452	-0.123316	8.97926	0.0806089	99.1307	28.336	0.25242	0.265058	5.0143e-15	2.91e-05	90.8107	0.1104	0.254515	90.7436	0.999996	4.96e-05
2366-36A	SRM04	Pagosa Peak Dacite (South)	0.0017377	4.9978e-06	sanidine	0.8	49.9436	0.252668	5.58728	0.223308	0.337896	0.0852298	0.113907	0.117761	0.0047514	0.0010666	28.753	9.95364	1.40022	110.398	31.3846	4.37737	4.37829	2.98444e-16	-0.0003483	-130.699	0.110912	4.23463	-131.916	0.999475	0.0004627
2366-36B	SRM04	Pagosa Peak Dacite (South)	0.0017377	4.9978e-06	sanidine	1	797.167	0.277849	88.4821	0.233048	1.24577	0.0867314	-0.169345	0.117415	0.0078019	0.0011161	-2.70032	8.84172	0.0858866	98.4881	27.9052	0.269009	0.280553	4.72626e-15	5.06e-05	56.1869	0.11139	0.275036	56.1156	0.999988	7.87e-05
2366-36C	SRM04	Pagosa Peak Dacite (South)	0.0017377	4.9978e-06	sanidine	1.2	1974.21	0.318904	219.425	0.239403	2.69166	0.0862228	-0.0022488	0.125129	0.0470496	0.0013279	-0.0144654	8.91012	0.0369195	99.2816	28.1195	0.115624	0.140748	1.17206e-14	2.41e-05	50.9278	0.111426	0.114577	50.897	0.999997	4.47e-05
2366-36D	SRM04	Pagosa Peak Dacite (South)	0.0017377	4.9978e-06	sanidine	1.4	4303.46	0.4	480.997	0.24982	5.84671	0.0872495	0.0195549	0.122874	0.0273259	0.0013247	0.0574038	8.91009	0.0166366	99.8362	28.1194	0.0521022	0.0956854	2.56924e-14	5.4798e-06	100.758	0.112048	0.0545675	100.745	1	1.57e-05
2366-36E	SRM04	Pagosa Peak Dacite (South)	0.0017377	4.9978e-06	sanidine	1.6	3971.93	0.353836	441.553	0.260474	5.50891	0.0862236	0.0186749	0.117077	0.0810472	0.0015847	0.0597406	8.9208	0.0174169	99.4181	28.1529	0.0545449	0.0971157	2.35855e-14	1.95e-05	29.2914	0.111445	0.061386	29.2771	0.999998	4.42e-05
2366-36F	SRM04	Pagosa Peak Dacite (South)	0.0017377	4.9978e-06	sanidine	1.8	1171.51	0.288444	128.783	0.228383	1.64582	0.0852299	-0.0490828	0.117415	0.0503648	0.0014098	-0.538681	8.93374	0.0591932	98.4753	28.1934	0.185372	0.202083	6.87896e-15	5.11e-05	38.0094	0.110229	0.185769	37.9603	0.999988	8.59e-05
2366-36G	SRM04	Pagosa Peak Dacite (South)	0.0017377	4.9978e-06	sanidine	2	1405.65	0.306105	155.897	0.228607	1.8125	0.0857221	-0.128769	0.117077	0.0138676	0.0012287	-1.16789	8.91577	0.0487511	99.1751	28.1371	0.152676	0.172509	8.32722e-15	2.76e-05	58.3791	0.111236	0.153731	58.3385	0.999996	5.29e-05
2366-36H	SRM04	Pagosa Peak Dacite (South)	0.0017377	4.9978e-06	sanidine	3	2623.16	0.332415	290.345	0.240404	3.59325	0.0857225	-0.0496694	0.117761	0.0451117	0.0013275	-0.241974	8.95504	0.0264661	99.3772	28.2601	0.0828797	0.115647	1.55088e-14	2.09e-05	41.7079	0.110974	0.0866288	41.686	0.999998	4.45e-05
2366-36I	SRM04	Pagosa Peak Dacite (South)	0.0017377	4.9978e-06	sanidine	5	1195.69	0.288444	130.444	0.23331	1.6586	0.0867315	-0.217646	0.115796	0.069636	0.001582	-2.36095	8.88023	0.0577825	97.2101	28.0258	0.180971	0.197862	6.96767e-15	9.34e-05	20.1039	0.109468	0.186699	20.0565	0.999957	0.0001551
2366-36J	SRM04	Pagosa Peak Dacite (South)	0.0017377	4.9978e-06	sanidine	12	471.837	0.272947	49.2183	0.211494	0.634194	0.0872483	0.0542648	0.116746	0.133185	0.0018614	1.56069	8.82553	0.15352	92.236	27.8545	0.480862	0.48739	2.62899e-15	0.00026	18.4799	0.10451	0.452753	18.3559	0.9997	0.0004002
2367-36A	SRM05	Pagosa Peak Dacite (North)	0.0017377	4.9978e-06	sanidine	0.8	32.0638	0.257752	3.17034	0.223307	-0.0982416	0.0852298	-0.0041065	0.118113	0.0034558	0.001026	-1.83706	9.67346	2.44674	95.9539	30.5085	7.65266	7.65315	1.69344e-16	0.0001355	527.684	0.0991929	7.37096	525.701	0.999903	0.0001662
2367-36B	SRM05	Pagosa Peak Dacite (North)	0.0017377	4.9978e-06	sanidine	1	577.953	0.277849	64.0147	0.232942	1.1076	0.0838053	0.0452696	0.116746	0.0078383	0.0010197	1.00334	9.01465	0.119179	100.06	28.4468	0.373174	0.381903	3.41935e-15	-2.00743e-06	-1954.2	0.110997	0.380516	-1954.3	1	3.11009e-06
2367-36C	SRM05	Pagosa Peak Dacite (North)	0.0017377	4.9978e-06	sanidine	1.2	2374	0.332415	264.729	0.245497	3.40089	0.0877737	0.104423	0.124209	0.0276899	0.0013248	0.559861	8.93882	0.0306301	99.9077	28.2094	0.095922	0.125232	1.41405e-14	3.08407e-06	329.753	0.111768	0.0972594	329.727	1	6.11737e-06
2367-36D	SRM05	Pagosa Peak Dacite (North)	0.0017377	4.9978e-06	sanidine	1.4	2927.56	0.368782	325.364	0.246463	4.06193	0.0877738	-0.0537759	0.116422	0.0733348	0.0015828	-0.234676	8.89776	0.0234978	99.1458	28.0807	0.0735915	0.108808	1.73793e-14	2.86e-05	27.0587	0.111428	0.0792449	27.0393	0.999996	7.41e-05
2367-36E	SRM05	Pagosa Peak Dacite (North)	0.0017377	4.9978e-06	sanidine	1.6	3915.33	0.376431	432.638	0.254332	5.48501	0.0852309	-0.019946	0.116105	0.164202	0.0019613	-0.0654856	8.91132	0.0177098	98.7188	28.1232	0.055463	0.0975652	2.31094e-14	4.29e-05	13.4745	0.110779	0.0613545	13.46	0.99999	0.0001119
2367-36F	SRM05	Pagosa Peak Dacite (North)	0.0017377	4.9978e-06	sanidine	1.8	2512.38	0.346554	277.76	0.240206	3.40984	0.0867318	0.0577847	0.117415	0.0929011	0.0016739	0.295683	8.93587	0.0277311	99.029	28.2001	0.0868439	0.118405	1.48366e-14	3.25e-05	28.0098	0.110822	0.0905969	27.9869	0.999995	7.5e-05
2367-36G	SRM05	Pagosa Peak Dacite (North)	0.0017377	4.9978e-06	sanidine	2	1372.34	0.294109	151.103	0.233476	2.06819	0.0857221	0.193007	0.129554	0.0625532	0.0014123	1.81613	9.01659	0.0557919	99.4581	28.4529	0.174696	0.192645	8.07119e-15	1.81e-05	101.323	0.110306	0.163029	101.276	0.999999	2.78e-05
2367-36H	SRM05	Pagosa Peak Dacite (North)	0.0017377	4.9978e-06	sanidine	3	1709.45	0.31241	187.702	0.228925	2.43804	0.0872485	-0.0725486	0.118473	0.0865364	0.0015861	-0.54976	8.92294	0.0412147	98.2432	28.1596	0.129073	0.15205	1.00261e-14	5.88e-05	22.9649	0.110102	0.128063	22.9308	0.999985	0.0001136
2367-36I	SRM05	Pagosa Peak Dacite (North)	0.0017377	4.9978e-06	sanidine	5	3114.99	0.368782	339.686	0.24672	4.25694	0.086732	0.0042043	0.116105	0.218011	0.0020736	0.0176115	8.95686	0.0225534	97.9181	28.2658	0.0706267	0.107219	1.81443e-14	6.97e-05	10.4453	0.109322	0.0759445	10.4269	0.999974	0.0001768
2367-36J	SRM05	Pagosa Peak Dacite (North)	0.0017377	4.9978e-06	sanidine	11.9	1639.5	0.306105	180.968	0.233758	2.37068	0.0847464	-0.0808594	0.118473	0.0699901	0.0014972	-0.636024	8.89374	0.0428101	98.4402	28.0682	0.134076	0.156186	9.66643e-15	5.22e-05	26.9826	0.110685	0.135337	26.9471	0.999987	9.55e-05
2368-32A	SRM06	Pagosa Peak Dacite (North)	0.0017377	4.9978e-06	sanidine	0.8	26.7382	0.254275	2.05569	0.221998	0.149673	0.0867314	-0.105205	0.116105	0.0246915	0.0011544	-72.8945	6.26487	3.44477	49.6384	19.8163	10.8373	10.8375	1.09805e-16	0.0016868	50.2092	0.0792329	10.9701	48.3478	0.976936	0.0016428
2368-32B	SRM06	Pagosa Peak Dacite (North)	0.0017377	4.9978e-06	sanidine	1	320.602	0.264008	34.2688	0.223342	0.520022	0.0842713	-0.253333	0.116746	0.0347472	0.0012468	-10.5335	8.56693	0.22037	92.173	27.0444	0.690555	0.694858	1.83047e-15	0.0002622	27.1046	0.107592	0.680339	26.9265	0.999685	0.000368
2368-32C	SRM06	Pagosa Peak Dacite (North)	0.0017377	4.9978e-06	sanidine	1.2	812.144	0.283019	89.827	0.233055	1.42632	0.0862226	-0.267022	0.126073	0.0222302	0.0013241	-4.23726	8.75868	0.0911087	97.2772	27.6451	0.285407	0.296115	4.79812e-15	9.12e-05	33.2274	0.111064	0.272467	33.1516	0.999966	0.0001342
2368-32D	SRM06	Pagosa Peak Dacite (North)	0.0017377	4.9978e-06	sanidine	1.4	3247.89	0.353836	363.166	0.258861	4.69121	0.0893952	-0.0399897	0.117761	0.031556	0.0013253	-0.157019	8.88812	0.0214288	99.6395	28.0506	0.0671129	0.10447	1.93986e-14	1.21e-05	58.6824	0.112104	0.0742766	58.6647	0.999999	2.72e-05
2368-32E	SRM06	Pagosa Peak Dacite (North)	0.0017377	4.9978e-06	sanidine	1.6	4402.93	0.384188	492.255	0.255767	6.12629	0.0872497	0.0470295	0.116746	0.0252601	0.0013245	0.136287	8.9127	0.0156915	99.8911	28.1276	0.0491421	0.0941261	2.62939e-14	3.63898e-06	142.373	0.112077	0.0542814	142.36	1	9.8584e-06
2368-32F	SRM06	Pagosa Peak Dacite (North)	0.0017377	4.9978e-06	sanidine	1.8	2616.64	0.346554	291.841	0.235242	3.77488	0.0867319	0.0073331	0.116746	0.0203415	0.0012216	0.0358661	8.92441	0.0262835	99.7856	28.1642	0.0823121	0.115051	1.55887e-14	7.17625e-06	121.526	0.111812	0.0846046	121.504	1	1.71e-05
2368-32G	SRM06	Pagosa Peak Dacite (North)	0.0017377	4.9978e-06	sanidine	2	2894.61	0.368782	323.52	0.246431	3.94786	0.0852304	-0.0823261	0.116422	0.017532	0.0012445	-0.363366	8.89255	0.0237333	99.6531	28.0645	0.0743296	0.109275	1.72809e-14	1.16e-05	67.7218	0.112063	0.0797222	67.7021	0.999999	3.01e-05
2368-32H	SRM06	Pagosa Peak Dacite (North)	0.0017377	4.9978e-06	sanidine	3	3785.06	0.368782	421.709	0.248394	5.03422	0.0883069	-0.0853571	0.118113	0.0168886	0.0013236	-0.289135	8.92822	0.0184858	99.7344	28.1761	0.0578918	0.0990876	2.25256e-14	8.88997e-06	68.6775	0.111707	0.0616579	68.6622	1	2.24e-05
2368-32I	SRM06	Pagosa Peak Dacite (North)	0.0017377	4.9978e-06	sanidine	5	4841.34	0.408044	539.269	0.257022	6.92363	0.0888481	0.251476	0.117415	0.0223581	0.0013241	0.66639	8.97224	0.0144502	100.166	28.314	0.0452501	0.0926143	2.88051e-14	-5.57623e-06	-85.1295	0.11164	0.0498795	-85.1414	1	1.67e-05
2368-32J	SRM06	Pagosa Peak Dacite (North)	0.0017377	4.9978e-06	sanidine	12	3202.65	0.346554	356.752	0.247039	4.43867	0.083806	-0.128378	0.117415	0.0301886	0.0014066	-0.514429	8.90681	0.0217268	99.4848	28.1091	0.0680441	0.105197	1.9056e-14	1.72e-05	41.6271	0.111695	0.0723847	41.6091	0.999999	3.89e-05
2369-31A	FCs-C9	Fish Canyon Tuff	0.0017377	4.9978e-06	sanidine	0.8	47.7001	0.257389	5.06968	0.232825	-0.0584139	0.0847462	0.101685	0.116746	0.0092401	0.0010133	28.6911	10.1176	1.56058	106.612	31.8972	4.87733	4.87818	2.70798e-16	-0.0002215	-216.339	0.105373	4.84818	-217.669	0.999749	0.0002778
2369-31B	FCs-C9	Fish Canyon Tuff	0.0017377	4.9978e-06	sanidine	1	660.747	0.272947	72.6075	0.23821	1.17821	0.0877733	0.102761	0.117077	0.0265429	0.0012456	2.02528	9.05882	0.106523	99.7175	28.5851	0.333522	0.343353	3.87835e-15	9.45532e-06	367.231	0.110078	0.342696	367.143	1	1.36e-05
2369-31C	FCs-C9	Fish Canyon Tuff	0.0017377	4.9978e-06	sanidine	1.2	1190.33	0.294109	132.539	0.238553	1.86	0.0867315	-0.013884	0.116746	0.021519	0.001245	-0.149959	8.90377	0.0580398	99.3958	28.0996	0.18177	0.198677	7.07959e-15	2.02e-05	95.0369	0.111633	0.188061	94.9886	0.999998	3.42e-05
2369-31D	FCs-C9	Fish Canyon Tuff	0.0017377	4.9978e-06	sanidine	1.4	3331.87	0.368782	372.11	0.24734	4.89045	0.0872492	0.105108	0.117077	0.0332873	0.0014905	0.40451	8.92285	0.020831	99.8879	28.1593	0.0652366	0.103513	1.98764e-14	3.74738e-06	184.01	0.111946	0.0696006	183.993	1	9.57178e-06
2369-31E	FCs-C9	Fish Canyon Tuff	0.0017377	4.9978e-06	sanidine	1.6	4328.52	0.392046	484.537	0.249911	5.97405	0.0852311	-0.253725	0.115796	0.0277293	0.0014063	-0.750182	8.8607	0.0158379	99.4659	27.9647	0.0496051	0.0939765	2.58817e-14	1.79e-05	29.3609	0.112255	0.0539913	29.3478	0.999998	5.18e-05
2369-31F	FCs-C9	Fish Canyon Tuff	0.0017377	4.9978e-06	sanidine	1.8	5013.38	0.4	560.75	0.252017	7.05235	0.0862243	0.0265946	0.117077	0.0170755	0.0013236	0.0679867	8.91199	0.0138582	99.9299	28.1253	0.0434008	0.0912545	2.99526e-14	2.34098e-06	195.869	0.11213	0.0470845	195.858	1	6.90716e-06
2369-31G	FCs-C9	Fish Canyon Tuff	0.0017377	4.9978e-06	sanidine	2	2228.18	0.31241	248.802	0.234585	3.1988	0.0847466	-0.0187727	0.114914	0.0032217	0.0012126	-0.108202	8.92461	0.0304983	99.9087	28.1649	0.0955117	0.124837	1.32898e-14	3.05124e-06	331.924	0.111947	0.0986819	331.898	1	6.00561e-06
2369-31H	FCs-C9	Fish Canyon Tuff	0.0017377	4.9978e-06	sanidine	3	3166.64	0.346554	352.971	0.246967	4.41664	0.0847469	-0.207575	0.118473	0.0041621	0.001205	-0.843655	8.90812	0.0222008	99.5773	28.1132	0.0695281	0.106172	1.8854e-14	1.42e-05	51.9283	0.111783	0.0731904	51.9099	0.999999	3.15e-05
2369-31I	FCs-C9	Fish Canyon Tuff	0.0017377	4.9978e-06	sanidine	5	2607.22	0.339411	290.171	0.240401	3.57525	0.0872488	-0.071082	0.118113	0.0039251	0.0011973	-0.35156	8.94298	0.0268987	99.7953	28.2224	0.0842362	0.116549	1.54995e-14	6.84925e-06	129.973	0.111591	0.0868265	129.951	1	1.5e-05
2369-31J	FCs-C9	Fish Canyon Tuff	0.0017377	4.9978e-06	sanidine	12	1373.3	0.3	152.59	0.233489	1.89826	0.0847463	0.0804683	0.115796	0.0037696	0.0011016	0.757104	9.00341	0.0501769	100.262	28.4116	0.157118	0.176807	8.15064e-15	-8.77324e-06	-188.903	0.11136	0.160223	-188.945	1	1.58e-05
2370-37A	SRM07	Pagosa Peak Dacite (North)	0.0017377	4.9978e-06	sanidine	0.8	26.2988	0.259237	2.19355	0.211741	-0.191468	0.0867314	-0.103934	0.125129	0.0063549	0.0010462	-68.1584	8.0889	3.59121	69.4094	25.5458	11.2627	11.2629	1.17169e-16	0.0010246	91.4249	0.0858082	9.94672	88.8446	0.994132	0.0010691
2370-37B	SRM07	Pagosa Peak Dacite (North)	0.0017377	4.9978e-06	sanidine	1	438.924	0.268328	48.2891	0.227967	0.512253	0.0847462	-0.209922	0.116746	0.0066244	0.001053	-6.25579	8.74965	0.158708	96.7358	27.6168	0.497177	0.503387	2.57938e-15	0.0001093	47.9239	0.11056	0.4934	47.7927	0.999947	0.0001582
2370-37C	SRM07	Pagosa Peak Dacite (North)	0.0017377	4.9978e-06	sanidine	1.2	1313.57	0.294109	146.207	0.228522	1.51335	0.0867315	0.0159372	0.117761	0.0085201	0.0011019	0.156922	8.95088	0.0531799	99.8732	28.2471	0.166536	0.185023	7.80971e-15	4.24045e-06	416.648	0.111579	0.164113	416.604	1	7.33638e-06
2370-37D	SRM07	Pagosa Peak Dacite (North)	0.0017377	4.9978e-06	sanidine	1.4	3655.12	0.361248	408.593	0.253803	5.05546	0.0857229	0.002151	0.117415	0.0175477	0.0013237	0.0075816	8.91068	0.0191464	99.8602	28.1212	0.0599624	0.100187	2.18251e-14	4.67553e-06	135.523	0.112068	0.0648925	135.507	1	1.11e-05
2370-37E	SRM07	Pagosa Peak Dacite (North)	0.0017377	4.9978e-06	sanidine	1.6	5431.75	0.432666	607.741	0.259041	7.66718	0.0847484	0.0202393	0.117077	0.0121825	0.0012055	0.0479788	8.91132	0.012877	99.9556	28.1232	0.040328	0.0898285	3.24627e-14	1.48027e-06	287.25	0.112167	0.044665	287.24	1	4.9486e-06
2370-37F	SRM07	Pagosa Peak Dacite (North)	0.0017377	4.9978e-06	sanidine	1.8	3734.12	0.368782	417.401	0.253993	5.45177	0.0857231	0.0903436	0.130598	0.0085417	0.0012438	0.312023	8.93147	0.0206956	100.076	28.1863	0.0648118	0.103306	2.22956e-14	-2.54379e-06	-271.342	0.112048	0.0640612	-271.359	1	5.61479e-06
2370-37G	SRM07	Pagosa Peak Dacite (North)	0.0017377	4.9978e-06	sanidine	2	2313.8	0.332415	257.78	0.23991	3.05523	0.0862229	-0.0052798	0.116105	0.007494	0.0011674	-0.0295377	8.94325	0.0299336	99.8888	28.2232	0.09374	0.123594	1.37694e-14	3.71804e-06	266.494	0.111692	0.0974443	266.469	1	7.95335e-06
2370-37H	SRM07	Pagosa Peak Dacite (North)	0.0017377	4.9978e-06	sanidine	3	5601.05	0.416173	623.889	0.259551	7.87113	0.0877754	-0.157612	0.116746	0.0107895	0.0014047	-0.364466	8.93388	0.0125368	99.7774	28.1939	0.0392609	0.0895343	3.33252e-14	7.44916e-06	55.303	0.111684	0.0435192	55.2926	1	2.3e-05
2370-37I	SRM07	Pagosa Peak Dacite (North)	0.0017377	4.9978e-06	sanidine	5	1743.58	0.3	193.648	0.233893	2.21039	0.0862227	0.246392	0.126073	0.0077262	0.00116	1.83634	9.05032	0.0430509	100.698	28.5585	0.134794	0.157517	1.03438e-14	-2.34e-05	-61.0616	0.111265	0.127354	-61.0979	0.999998	3.81e-05
2370-37J	SRM07	Pagosa Peak Dacite (North)	0.0017377	4.9978e-06	sanidine	12	642.12	0.283019	70.5475	0.232967	0.821335	0.0852298	0.0818372	0.116105	0.0051547	0.0010195	1.67485	9.13127	0.109583	100.51	28.8119	0.343059	0.352774	3.76832e-15	-1.71e-05	-209.109	0.110072	0.345745	-209.201	0.999999	2.69e-05
2371-30A	SRM09	Fish Canyon Tuff	0.0017377	4.9978e-06	sanidine	0.8	35.6606	0.259237	2.38476	0.208691	0.0555621	0.0847462	0.039012	0.115796	0.0316219	0.0011851	23.6335	12.0409	3.38743	79.9857	37.8982	10.5521	10.5527	1.27383e-16	0.0006703	95.8187	0.0664283	9.27117	93.5134	0.995351	0.0005952
2371-30B	SRM09	Fish Canyon Tuff	0.0017377	4.9978e-06	sanidine	1	366.308	0.268328	40.1183	0.210521	0.59535	0.0829003	0.0010755	0.130598	0.0127186	0.0010811	0.0387451	9.01552	0.213481	98.9859	28.4495	0.668454	0.673367	2.14294e-15	3.4e-05	207.668	0.109795	0.559999	207.487	0.999996	4.62e-05
2371-30C	SRM09	Fish Canyon Tuff	0.0017377	4.9978e-06	sanidine	1.2	1891.67	0.31241	211.285	0.239306	2.5412	0.0857222	0.0981655	0.117415	0.0296377	0.001325	0.671736	8.91844	0.0369778	99.8377	28.1455	0.115805	0.140938	1.12859e-14	5.42784e-06	226.45	0.111945	0.11861	226.419	1	1.02e-05
2371-30D	SRM09	Fish Canyon Tuff	0.0017377	4.9978e-06	sanidine	1.4	3036.07	0.353836	338.895	0.241246	4.31378	0.0852305	0.0618912	0.116105	0.024542	0.0013244	0.264141	8.92635	0.0228488	99.8799	28.1703	0.0715554	0.107631	1.81022e-14	4.01651e-06	188.621	0.111893	0.0746299	188.602	1	9.65524e-06
2371-30E	SRM09	Fish Canyon Tuff	0.0017377	4.9978e-06	sanidine	1.6	3797.32	0.376431	424.238	0.248451	5.37792	0.0867324	-0.0775351	0.117415	0.025693	0.0013245	-0.26444	8.89874	0.0184839	99.6781	28.0838	0.0578887	0.0988737	2.26609e-14	1.08e-05	56.8737	0.112014	0.0613666	56.8583	0.999999	2.82e-05
2371-30F	SRM09	Fish Canyon Tuff	0.0017377	4.9978e-06	sanidine	1.8	4776.69	0.408044	533.543	0.268873	6.7238	0.0883076	-0.152821	0.117077	0.0310149	0.0014902	-0.41469	8.89469	0.0147775	99.6176	28.0711	0.046281	0.0925261	2.84994e-14	1.28e-05	37.9858	0.111997	0.0525544	37.9736	0.999999	3.66e-05
2371-30G	SRM09	Fish Canyon Tuff	0.0017377	4.9978e-06	sanidine	2	2284.53	0.325576	254.67	0.239866	3.1042	0.0867317	-0.279537	0.116105	0.0174975	0.0012445	-1.58977	8.85733	0.0303617	99.0475	27.9541	0.0950949	0.124134	1.36033e-14	3.19e-05	31.6013	0.111825	0.0985453	31.576	0.999995	6.53e-05
2371-30H	SRM09	Fish Canyon Tuff	0.0017377	4.9978e-06	sanidine	3	1994.43	0.325576	222.14	0.244936	3.0745	0.0852302	0.116352	0.118113	0.010034	0.0011091	0.758899	8.97603	0.0355203	100.198	28.3259	0.111229	0.137504	1.18657e-14	-6.64679e-06	-176.725	0.111629	0.115389	-176.755	1	1.31e-05
2371-30I	SRM09	Fish Canyon Tuff	0.0017377	4.9978e-06	sanidine	4.95833	2806.55	0.332415	311.928	0.246232	3.87843	0.0857225	-0.0117329	0.116422	0.0225844	0.0012451	-0.0545204	8.95086	0.0249745	99.7352	28.2471	0.0782091	0.112321	1.66617e-14	8.86263e-06	92.9053	0.111425	0.0825031	92.8845	1	1.83e-05
2371-30J	SRM09	Fish Canyon Tuff	0.0017377	4.9978e-06	sanidine	12	1562.41	0.306105	173.401	0.238901	2.29299	0.0867316	-0.0566114	0.117077	0.0127855	0.0011904	-0.473394	8.945	0.0450367	99.5431	28.2287	0.141037	0.162426	9.26231e-15	1.53e-05	97.2657	0.111283	0.144164	97.2282	0.999999	2.74e-05
2372-36A	SRM08	Fish Canyon Tuff	0.0017377	4.9978e-06	sanidine	0.8	25.7458	0.256673	2.27917	0.208691	0.0310754	0.0862225	0.16475	0.116422	0.0025803	0.0010064	104.879	15.841	3.92321	134.911	49.6979	12.1426	12.1434	1.21743e-16	-0.0011694	-76.798	0.0851653	10.0441	-80.3295	0.991552	0.0012892
2372-36B	SRM08	Fish Canyon Tuff	0.0017377	4.9978e-06	sanidine	1	450.335	0.268328	49.5556	0.227971	0.527299	0.0842713	-0.080175	0.116746	0.0072333	0.0010531	-2.34829	8.91712	0.156535	98.4617	28.1414	0.490229	0.496765	2.64703e-15	5.15e-05	99.9737	0.110419	0.481816	99.8434	0.999988	7.38e-05
2372-36C	SRM08	Fish Canyon Tuff	0.0017377	4.9978e-06	sanidine	1.2	1334.7	0.3	148.921	0.233457	1.81831	0.0842714	0.0096797	0.117761	0.016439	0.0011098	0.0943791	8.91115	0.0526745	99.6749	28.1227	0.164965	0.183456	7.95468e-15	1.09e-05	161.169	0.111854	0.164447	161.125	1	1.91e-05
2372-36D	SRM08	Fish Canyon Tuff	0.0017377	4.9978e-06	sanidine	1.4	2991.49	0.346554	334.176	0.24662	4.19066	0.0857226	-0.136786	0.117077	0.0268734	0.0013247	-0.594571	8.87913	0.0234542	99.4611	28.0224	0.0734573	0.108596	1.78502e-14	1.8e-05	43.1496	0.112017	0.0772215	43.1301	0.999998	4.03e-05
2372-36E	SRM08	Fish Canyon Tuff	0.0017377	4.9978e-06	sanidine	1.6	4323.71	0.392046	482.799	0.249866	6.16542	0.0857234	-0.0987522	0.117415	0.059602	0.0016663	-0.297223	8.88314	0.0163248	99.4538	28.035	0.051128	0.0949569	2.57889e-14	1.83e-05	29.5834	0.111958	0.0542754	29.5699	0.999998	5.12e-05
2372-36F	SRM08	Fish Canyon Tuff	0.0017377	4.9978e-06	sanidine	1.8	3598.23	0.376431	402.146	0.247963	4.911	0.0852307	-0.145097	0.118113	0.0187685	0.0012447	-0.524625	8.88796	0.0196816	99.6046	28.0501	0.0616409	0.101041	2.14808e-14	1.32e-05	49.377	0.112067	0.0646612	49.3607	0.999999	3.43e-05
2372-36G	SRM08	Fish Canyon Tuff	0.0017377	4.9978e-06	sanidine	2	2201.47	0.325576	245.623	0.245233	3.09958	0.0862229	-0.0124174	0.117077	0.0065605	0.0010947	-0.0735358	8.92908	0.0319479	99.8782	28.1788	0.100051	0.128367	1.31201e-14	4.07345e-06	259.968	0.111857	0.10441	259.941	1	8.06311e-06
2372-36H	SRM08	Fish Canyon Tuff	0.0017377	4.9978e-06	sanidine	3	3909.53	0.353836	435.203	0.248703	5.52789	0.0867325	-0.241209	0.117761	0.0316838	0.0014068	-0.806505	8.9034	0.0181617	99.3923	28.0984	0.0568791	0.0983197	2.32466e-14	2.03e-05	29.5088	0.111634	0.0598004	29.4937	0.999998	4.64e-05
2372-36I	SRM08	Fish Canyon Tuff	0.0017377	4.9978e-06	sanidine	5	2333.36	0.31241	259.477	0.234738	3.14472	0.0852302	-0.145782	0.117077	0.0085338	0.0011453	-0.817852	8.92397	0.030155	99.519	28.1628	0.0944366	0.124012	1.38601e-14	1.61e-05	62.0986	0.111519	0.0948646	62.0735	0.999999	3.04e-05
2372-36J	SRM08	Fish Canyon Tuff	0.0017377	4.9978e-06	sanidine	12	441.244	0.268328	48.5226	0.227968	0.601742	0.085722	-0.0042043	0.116422	0.0012739	0.0010664	-0.126178	9.05732	0.160438	99.8573	28.5804	0.502331	0.508909	2.59186e-15	4.77254e-06	1102.06	0.11025	0.492496	1101.92	1	6.8179e-06
